# Supplementary material for: Genome-Wide DNA Methylation Analysis during Osteogenic Differentiation of Human Bone Marrow Mesenchymal Stem Cells
Source: Hindawi journal article supplement (doi:10.1155/2018/8238496), 2018-09-10
Supplement: f1 [file 8238496.f1.pdf]

# Methylation Levels at TFBS

Ost7D Ost0D

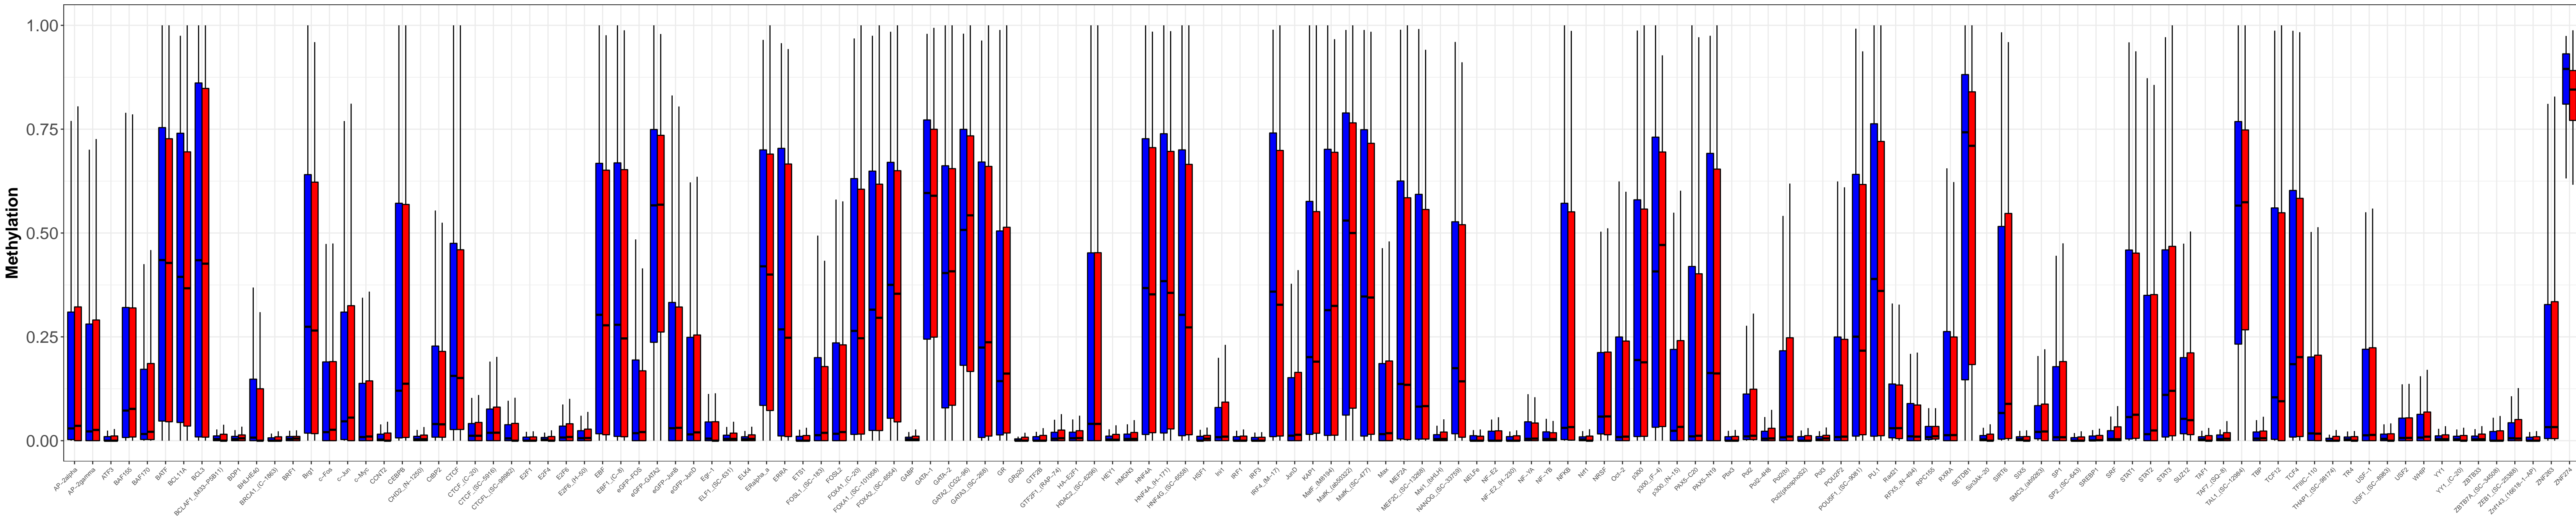

# Gene Function Classification (GO)

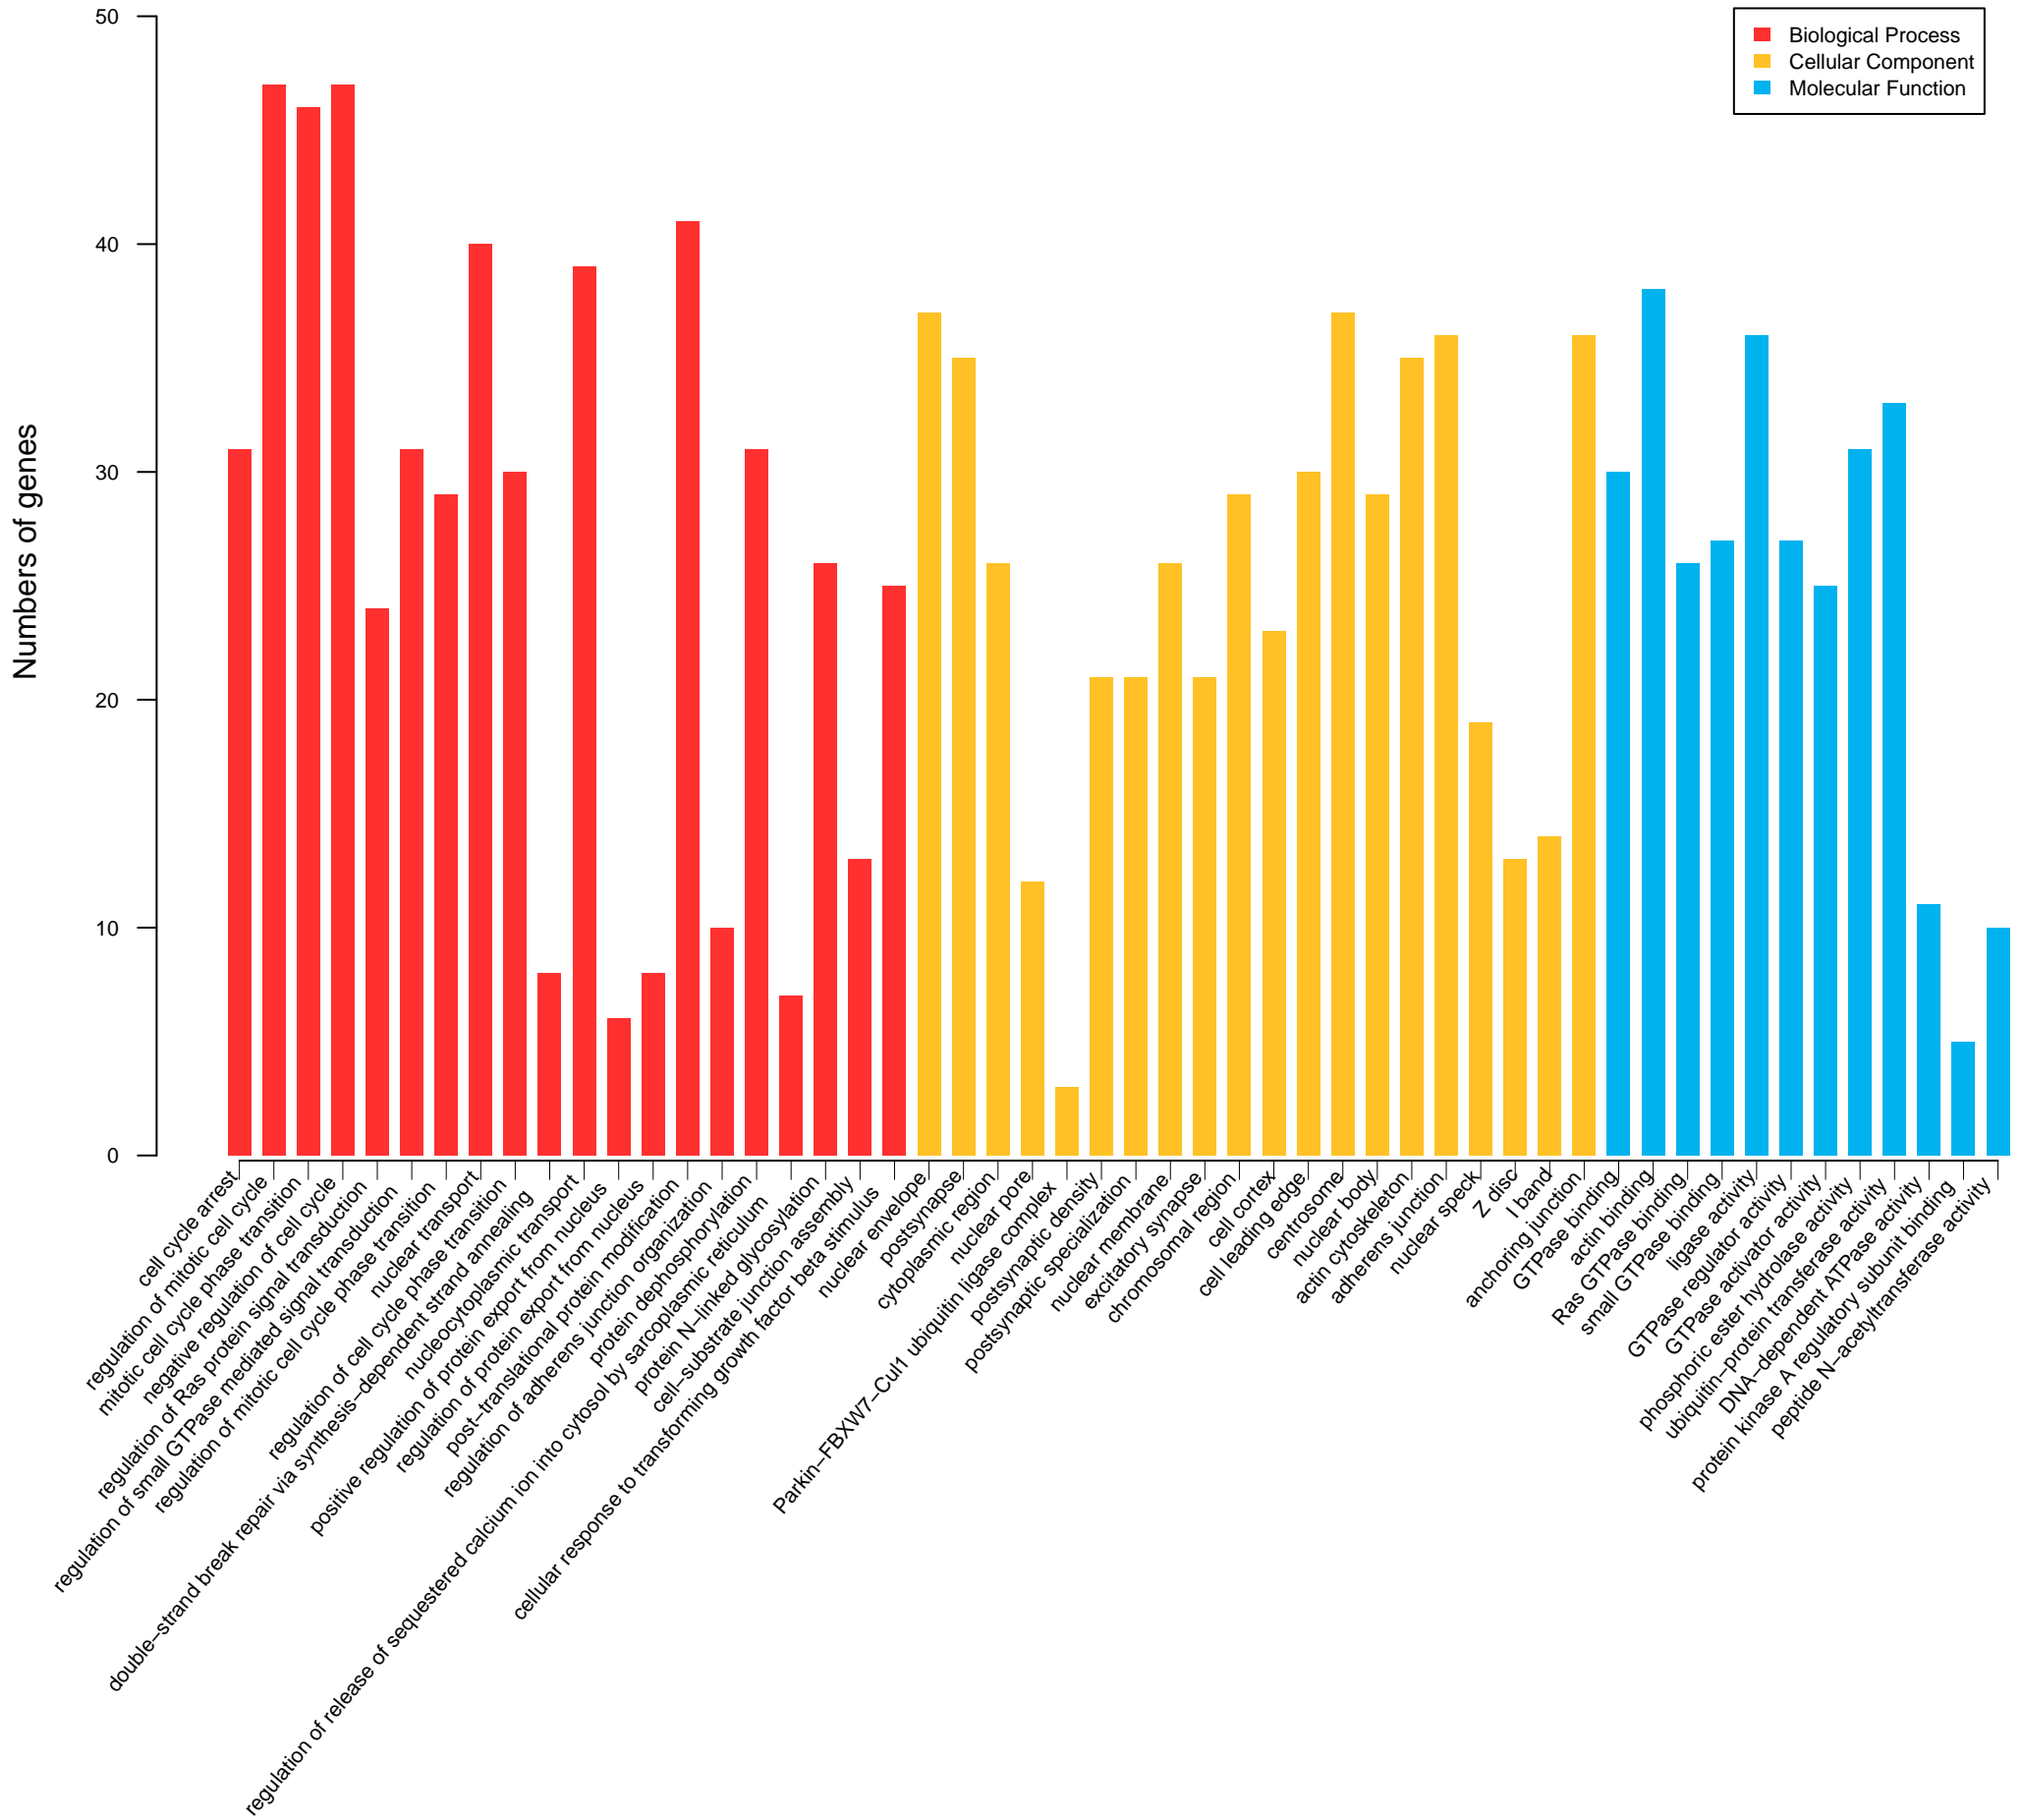

# Gene Function Classification (GO)

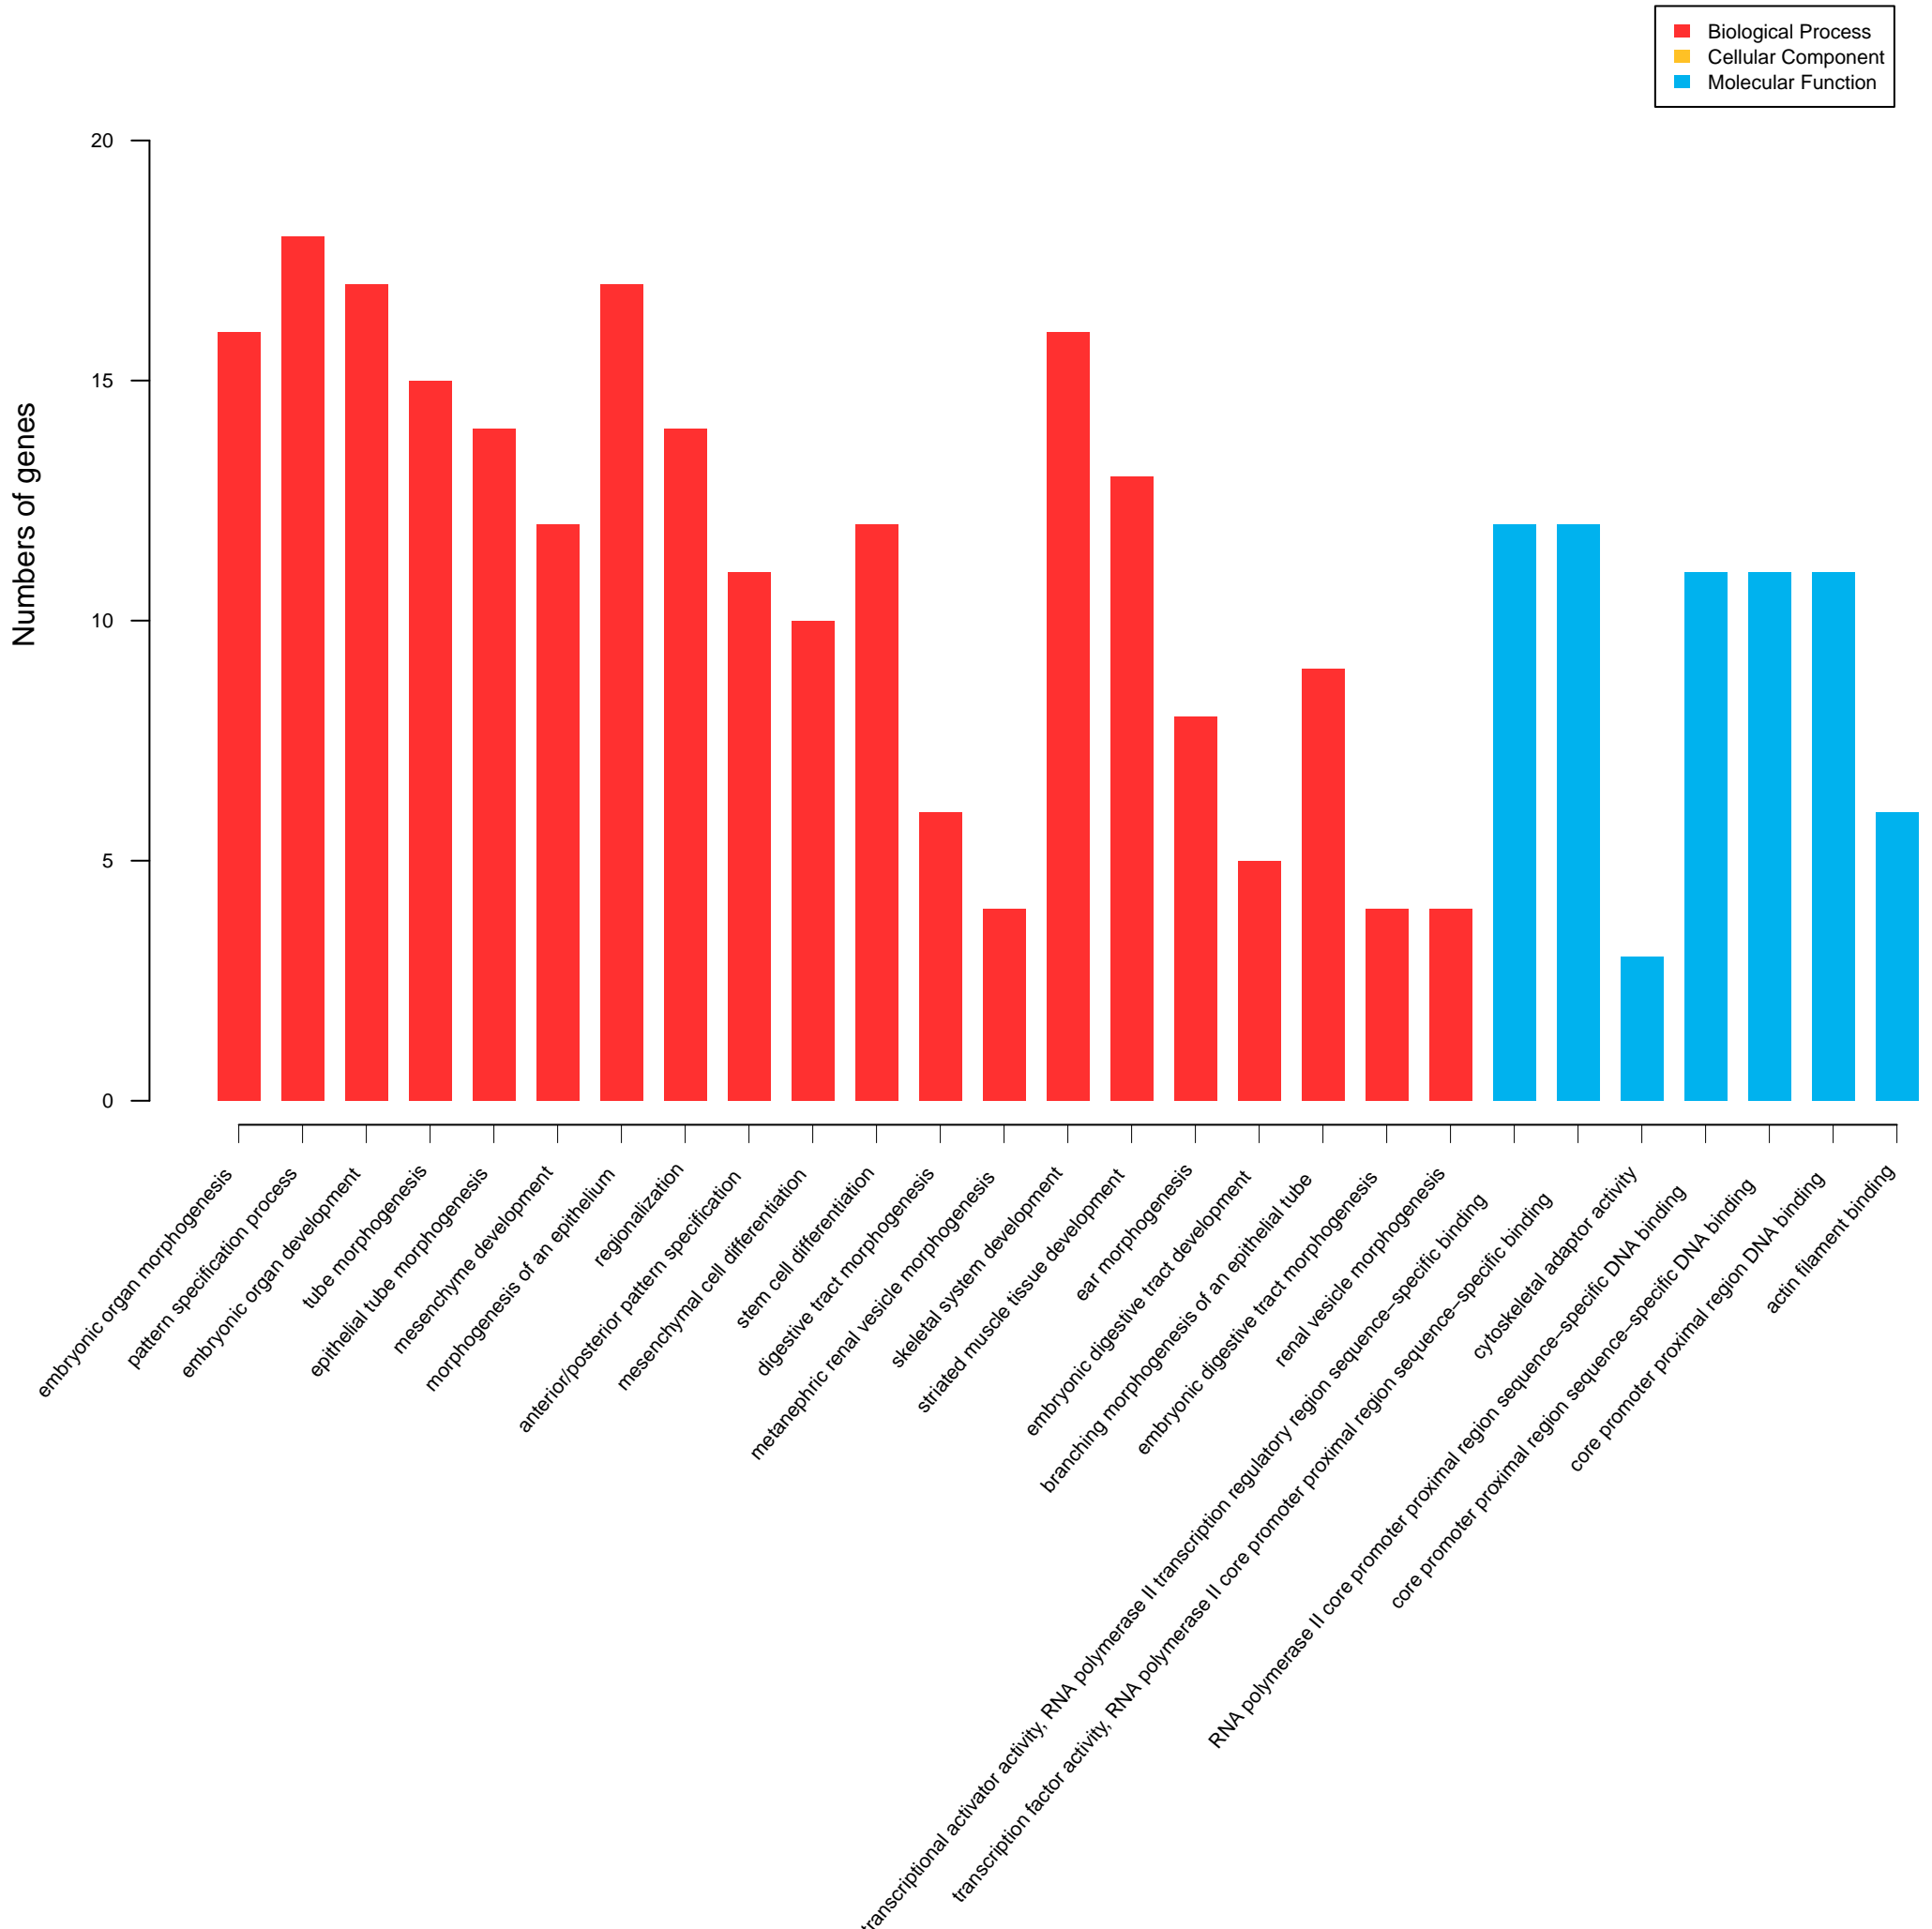

# Gene Function Classification (GO)

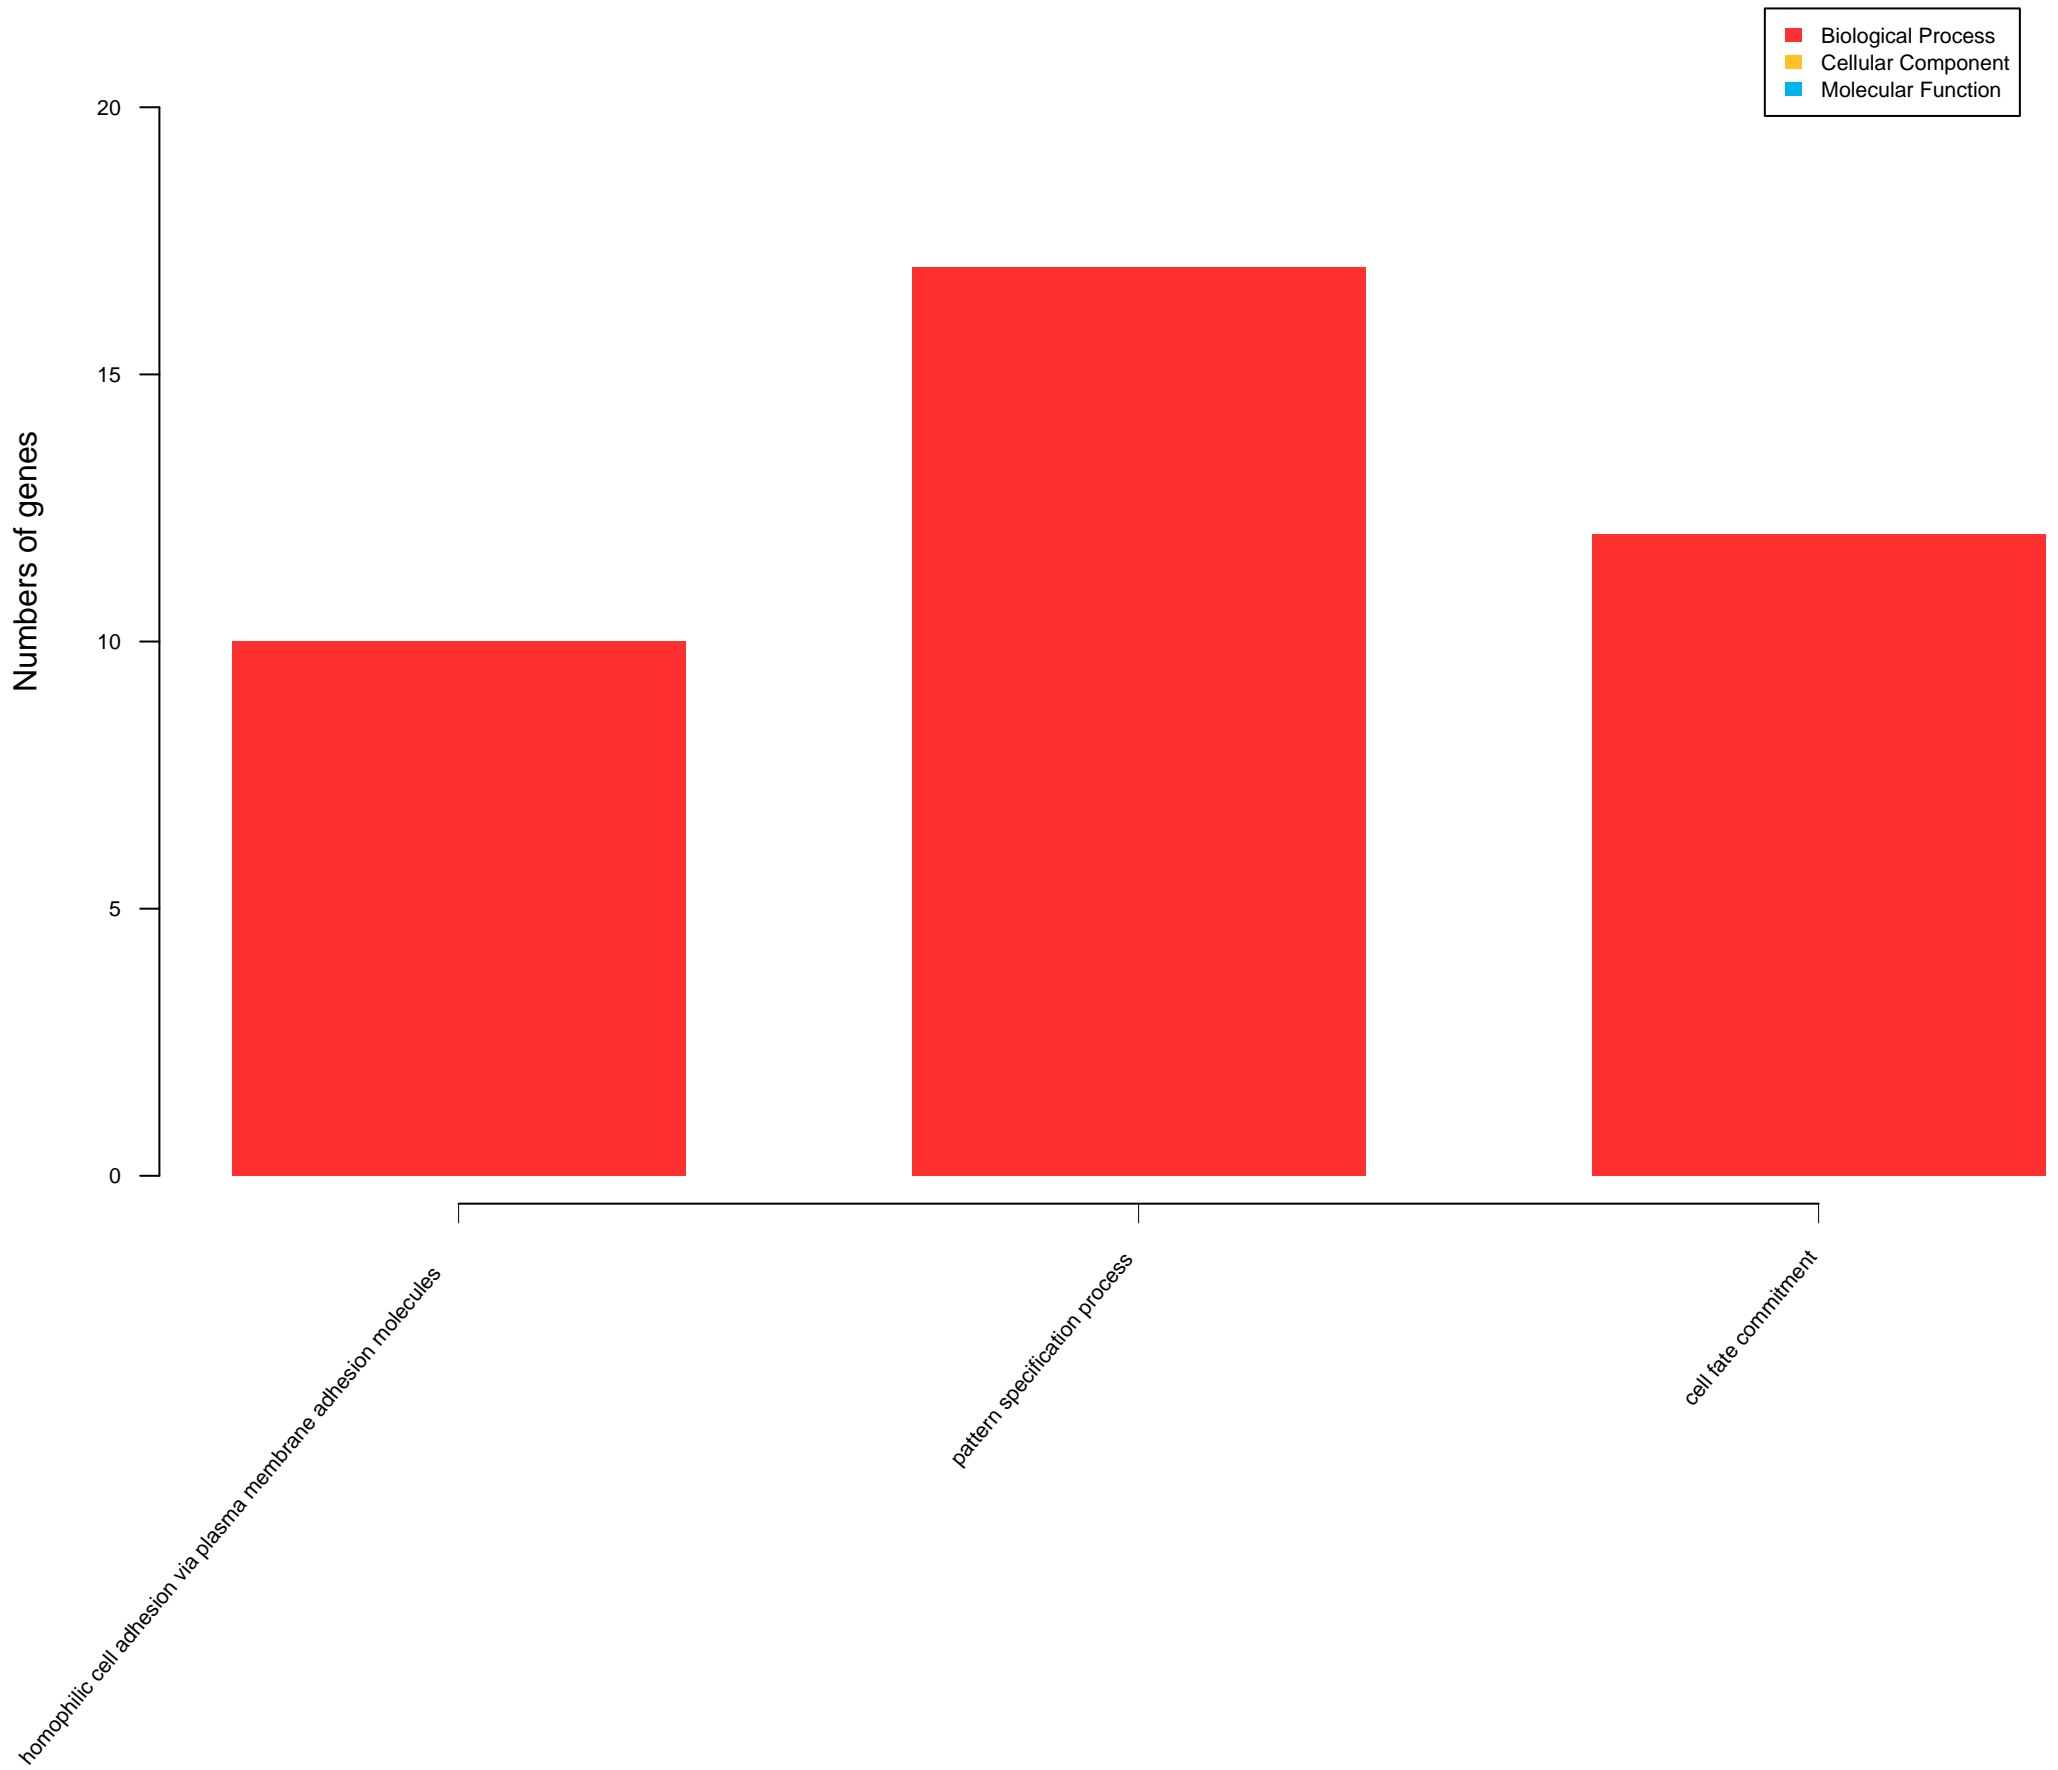

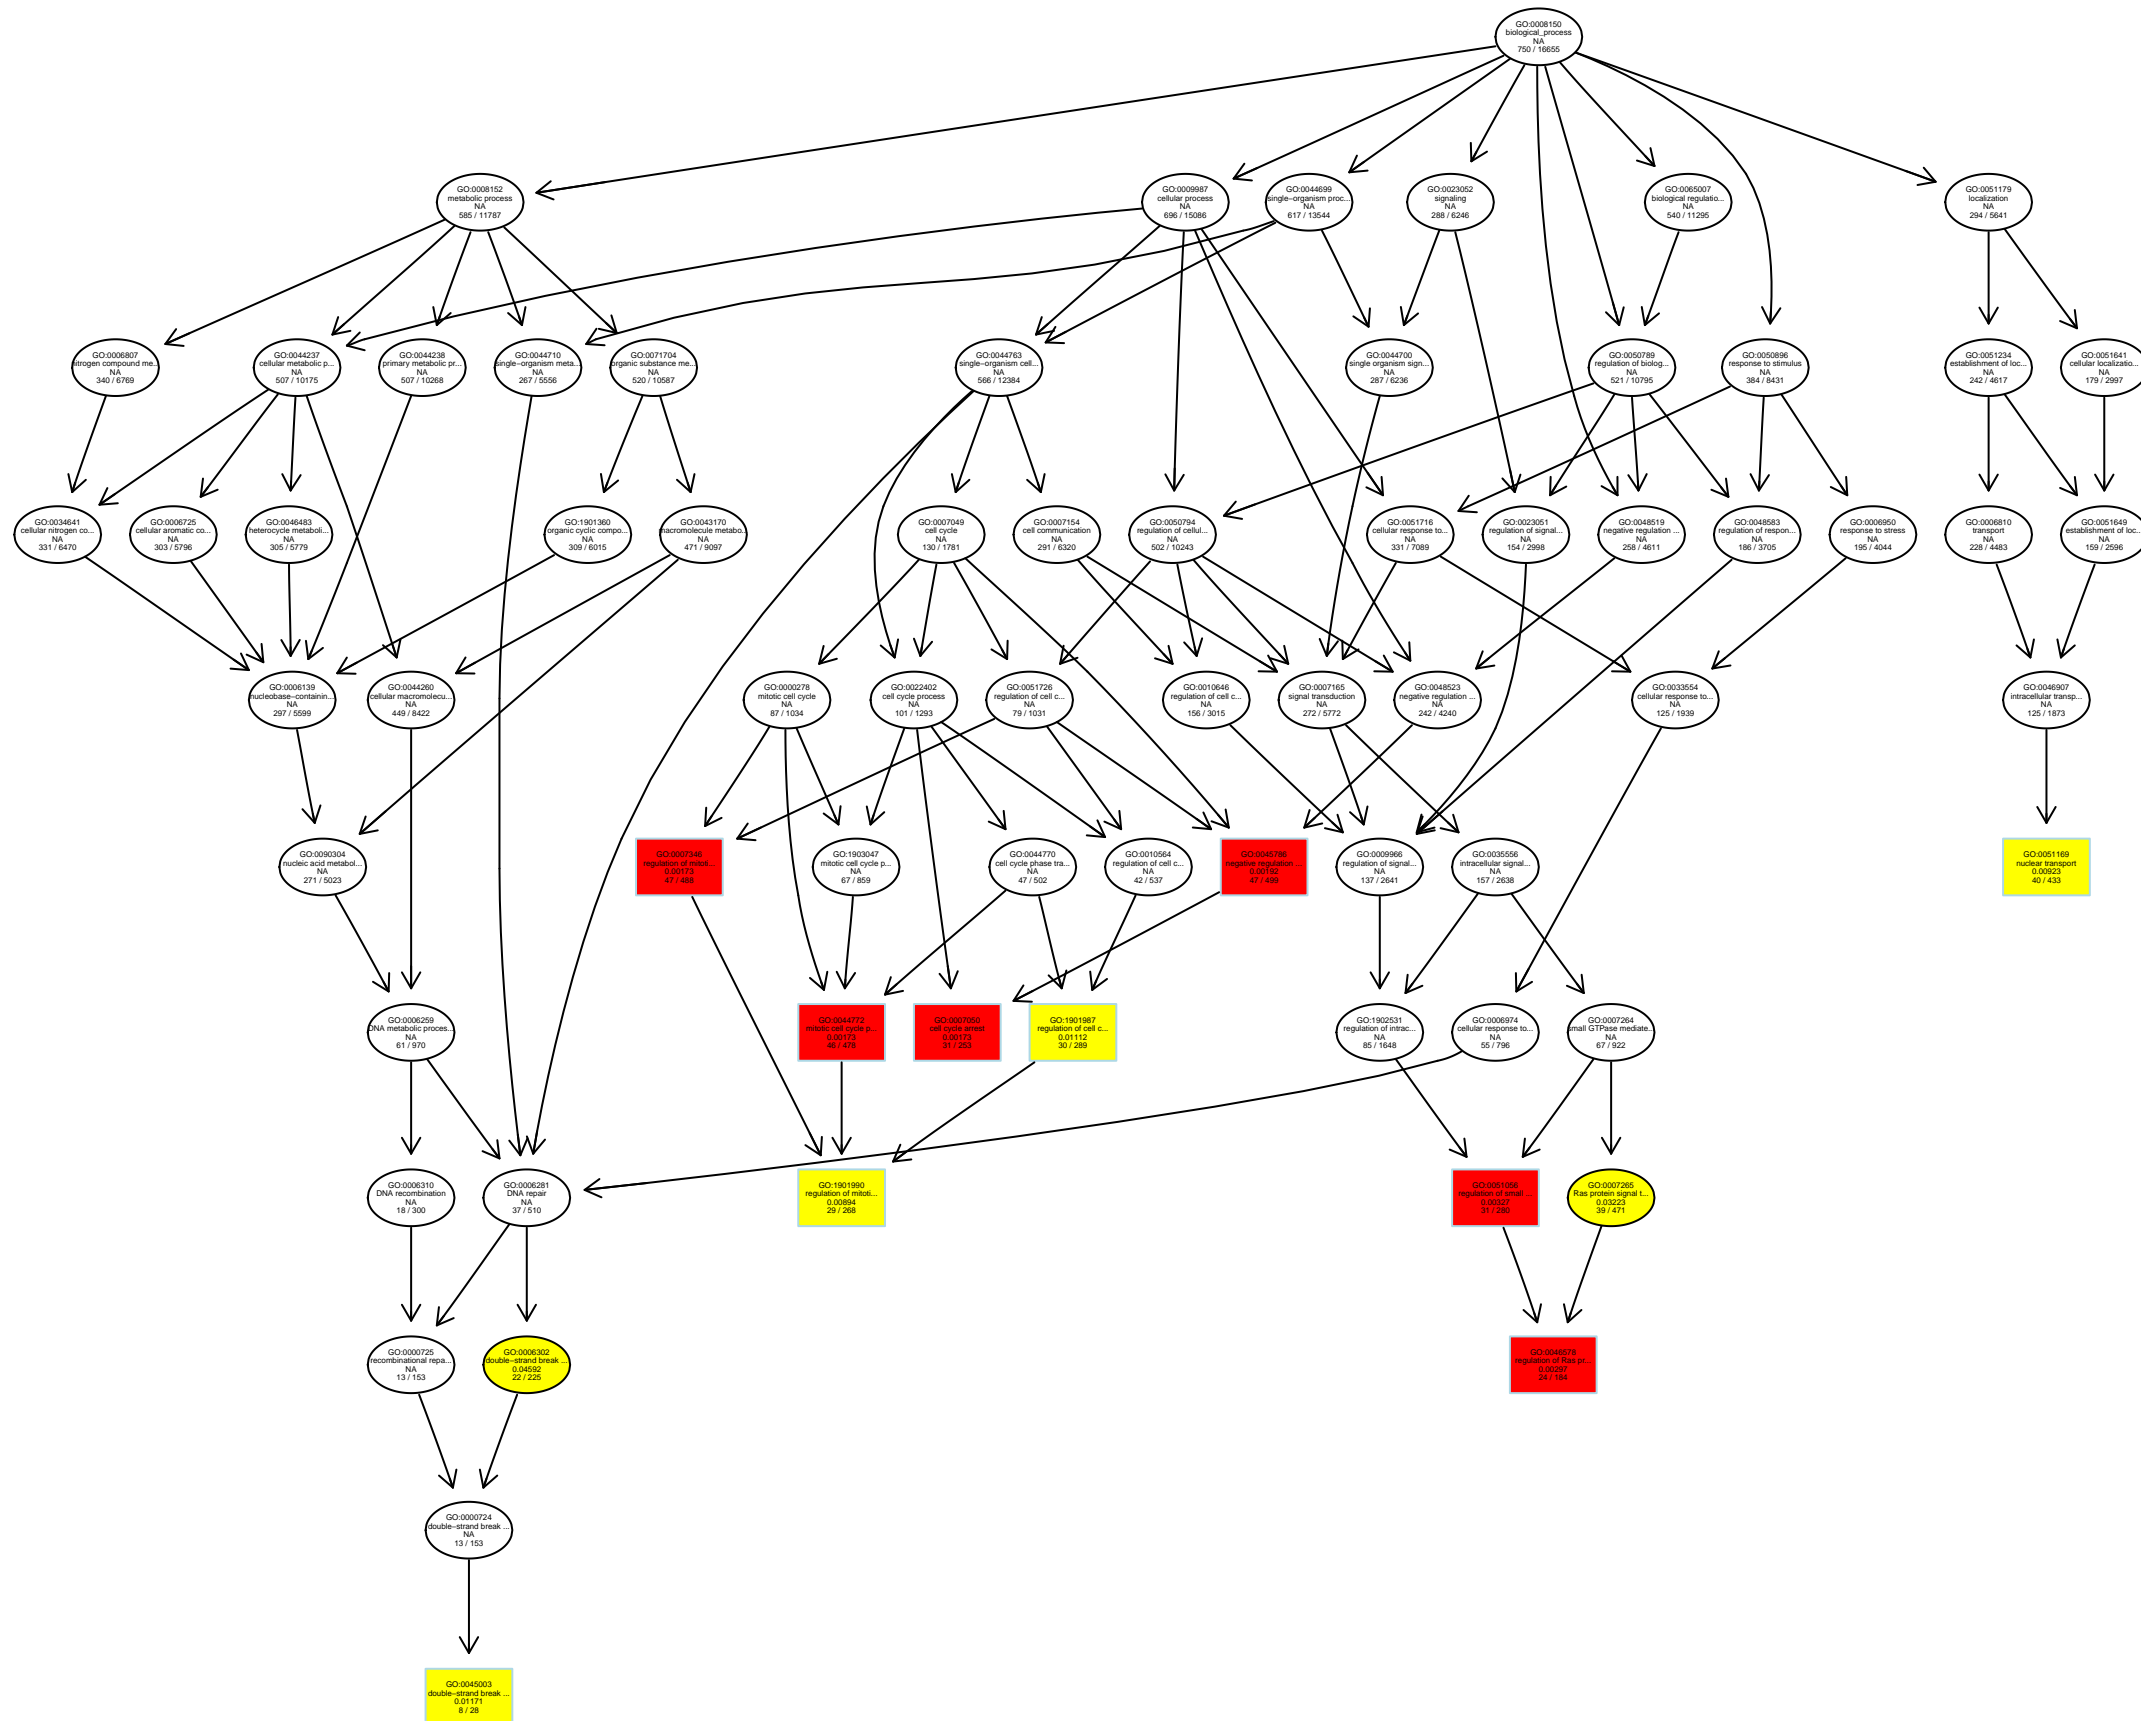

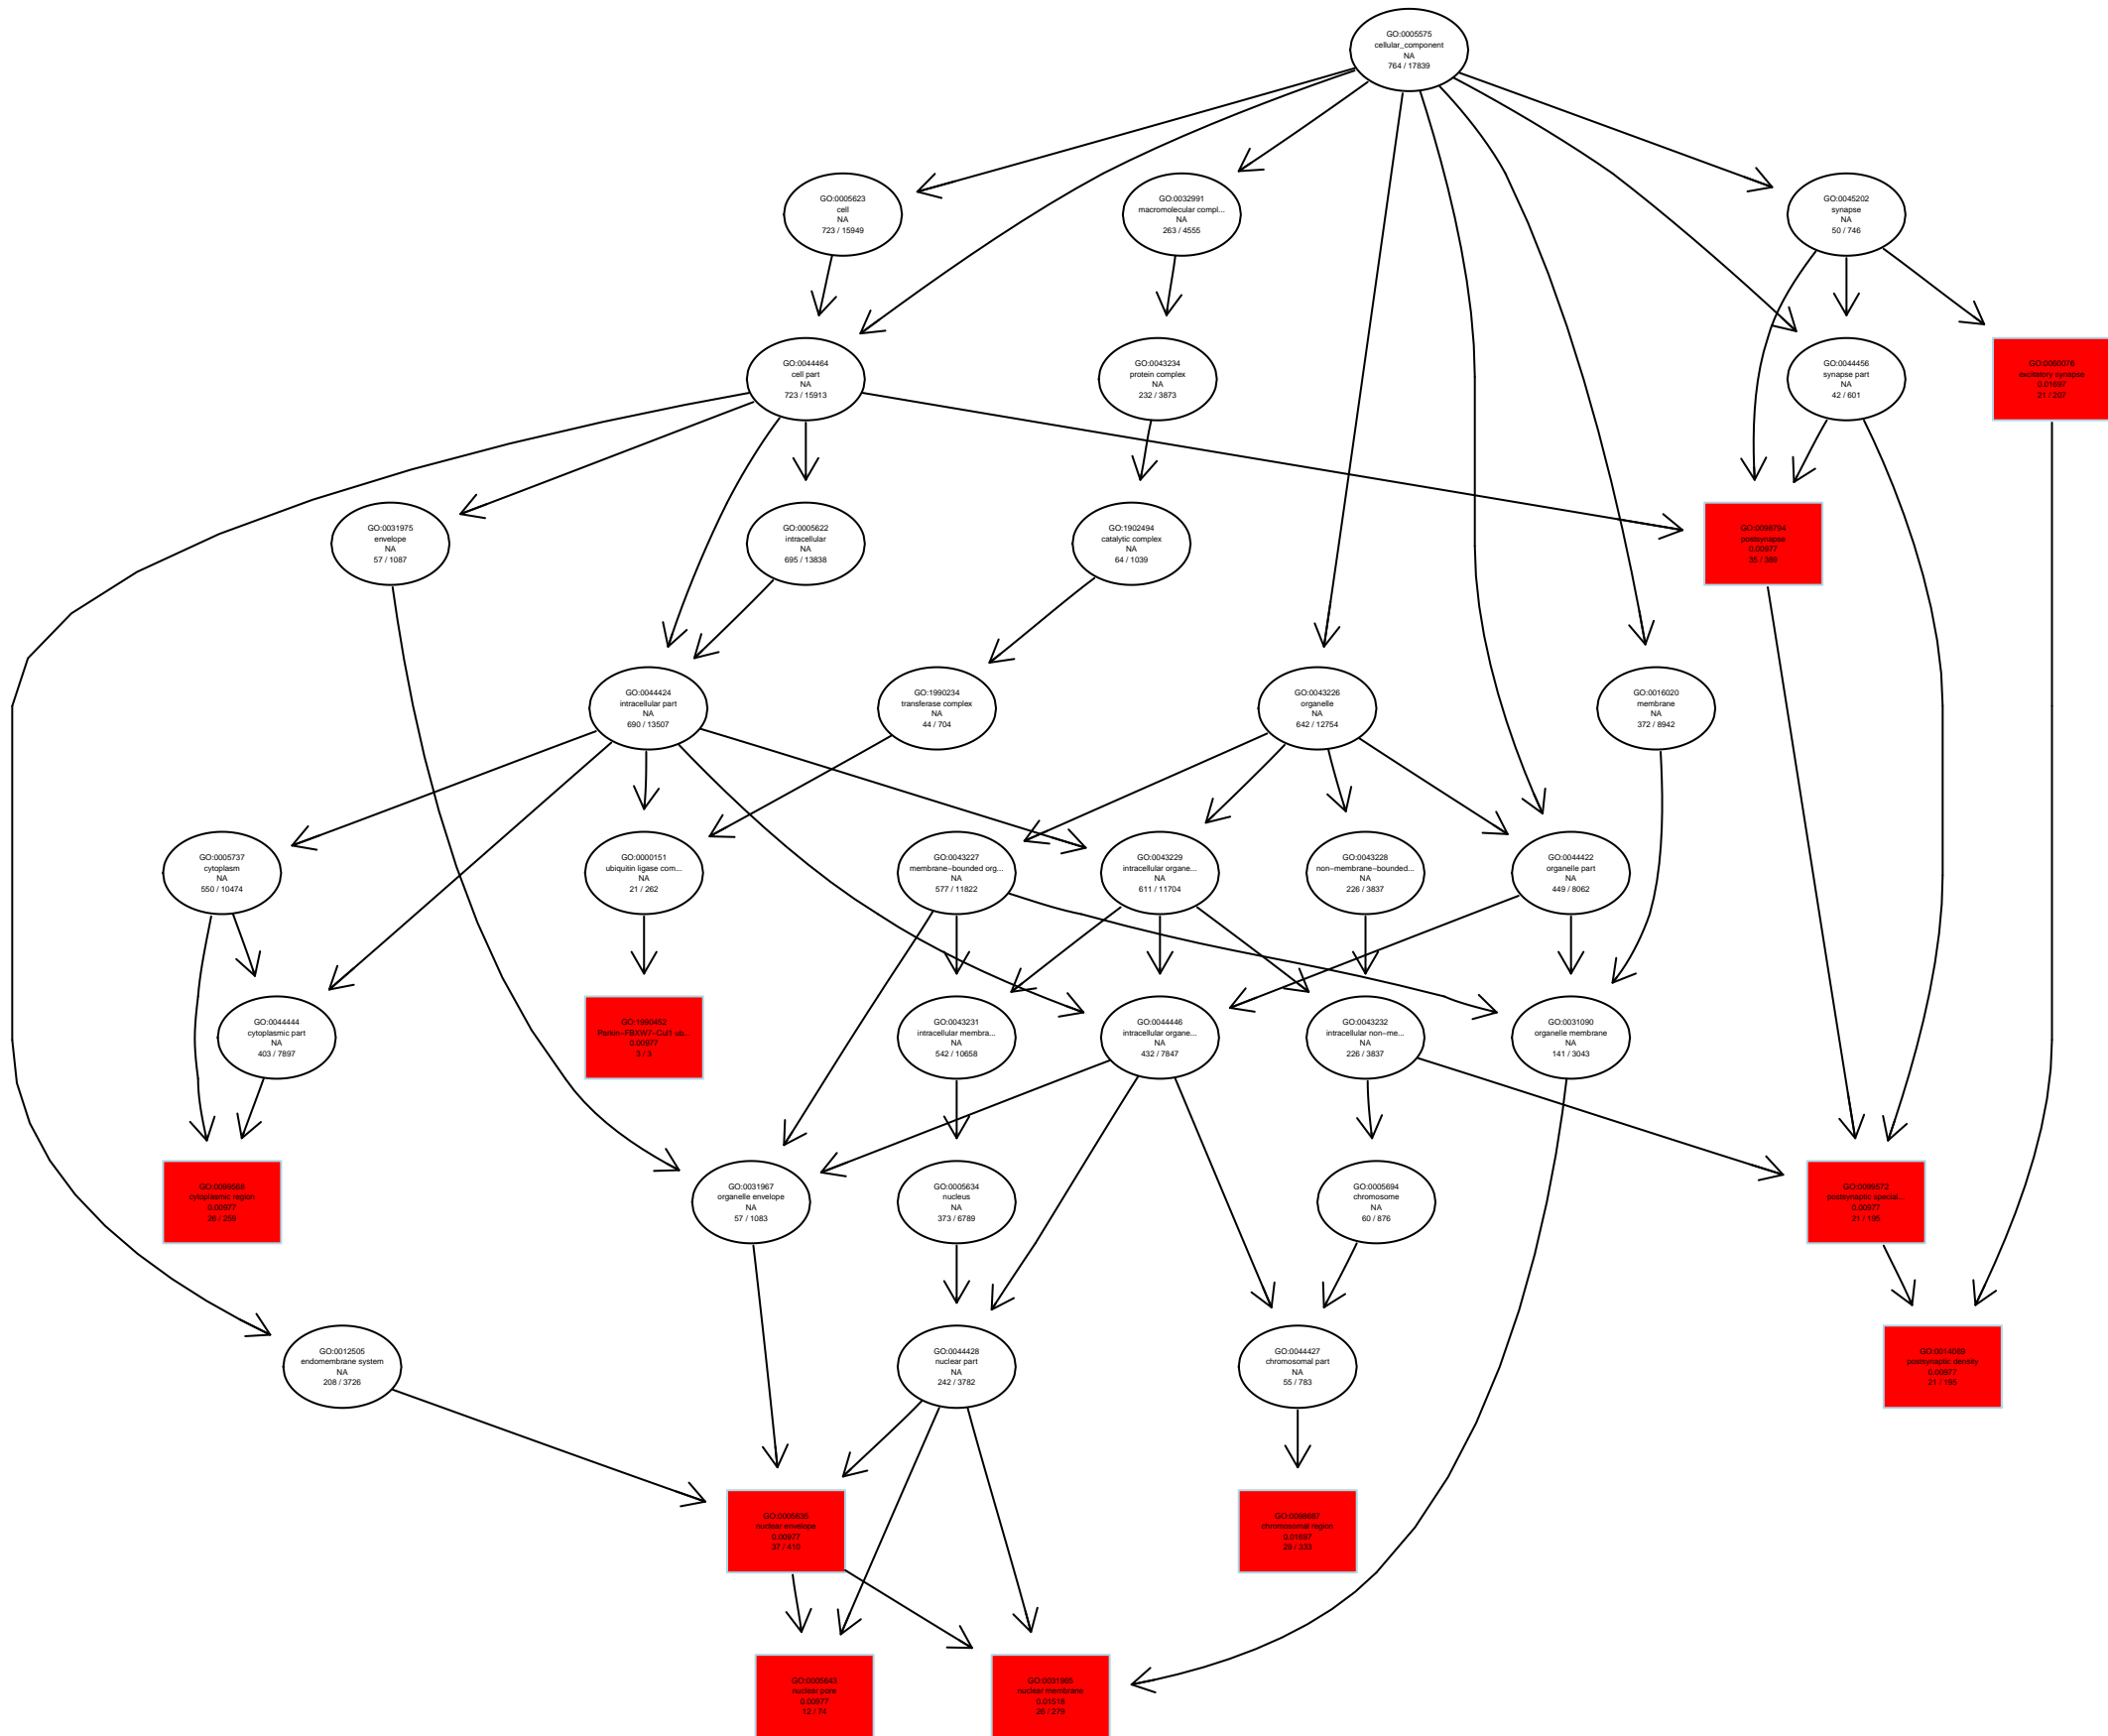

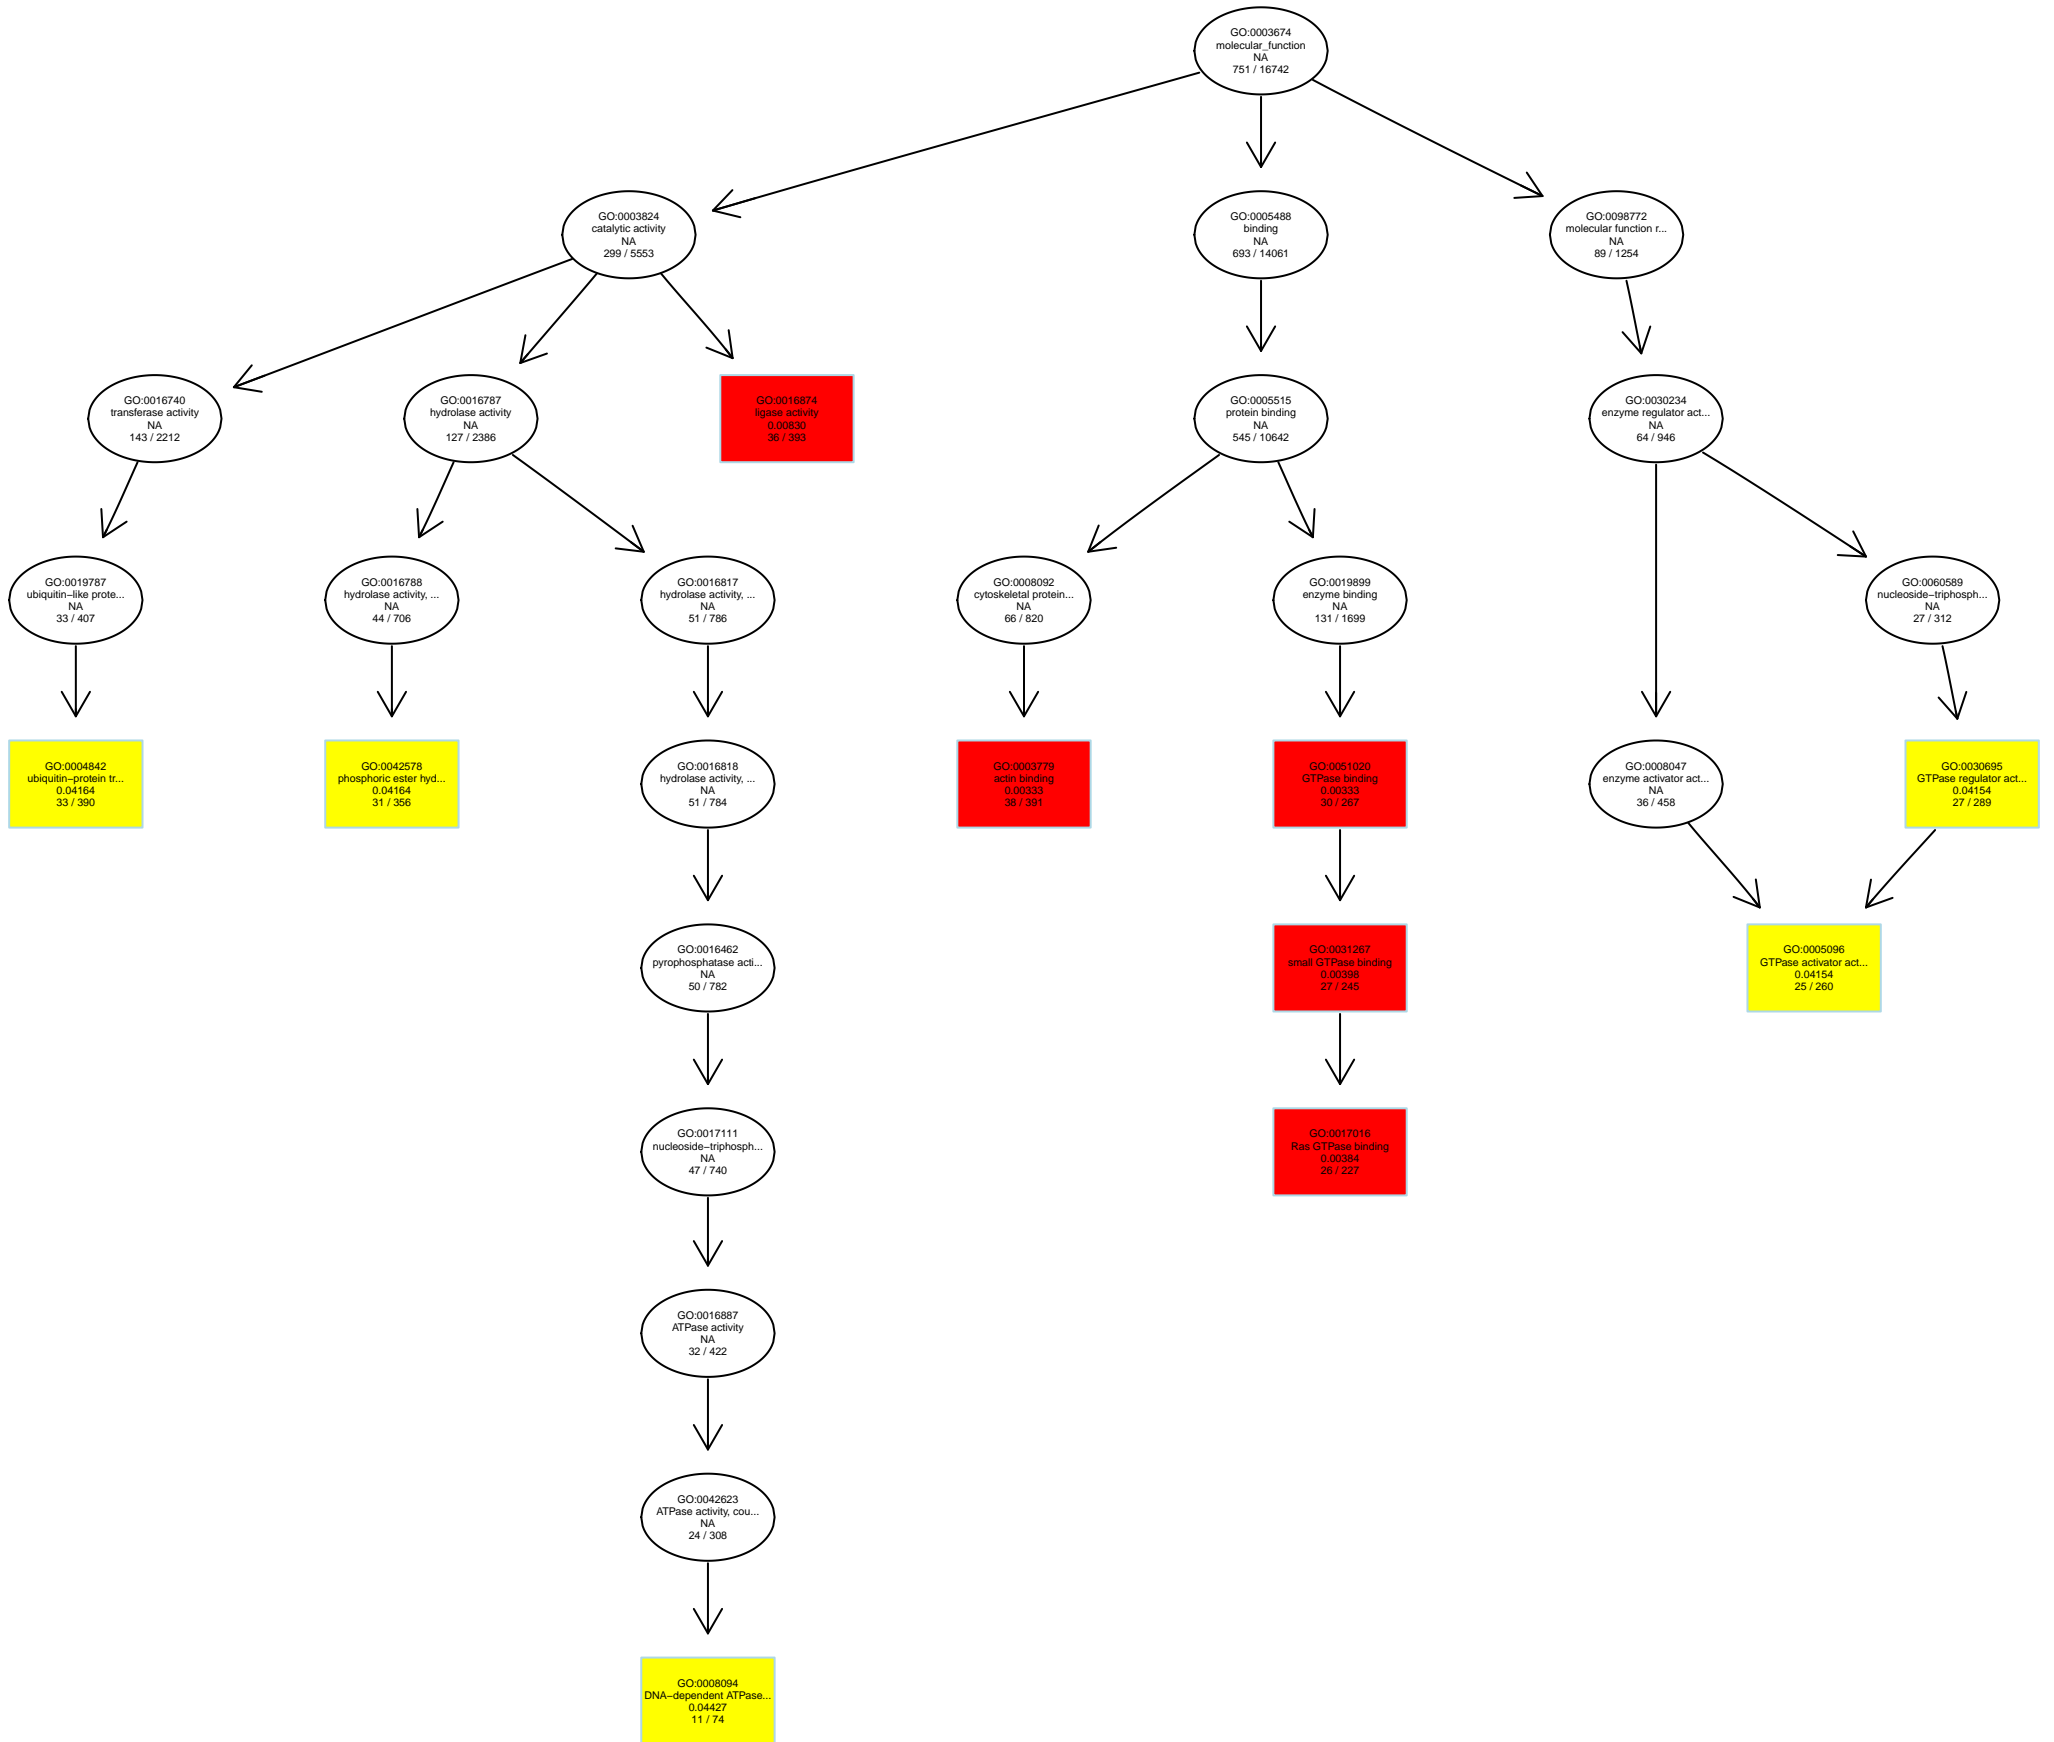

WNT SIGNALING PATHWAY

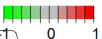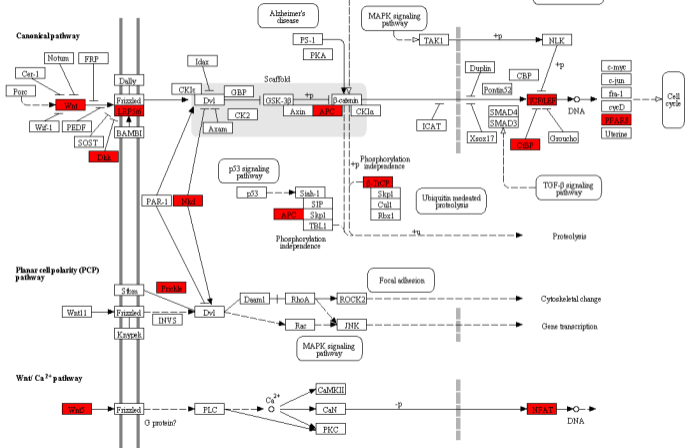



# INOSITOL PHOSPHATE METABOLISM

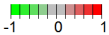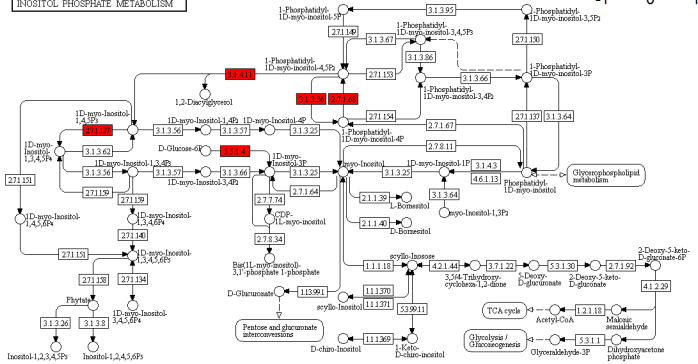

**COCAINE ADDICTION**

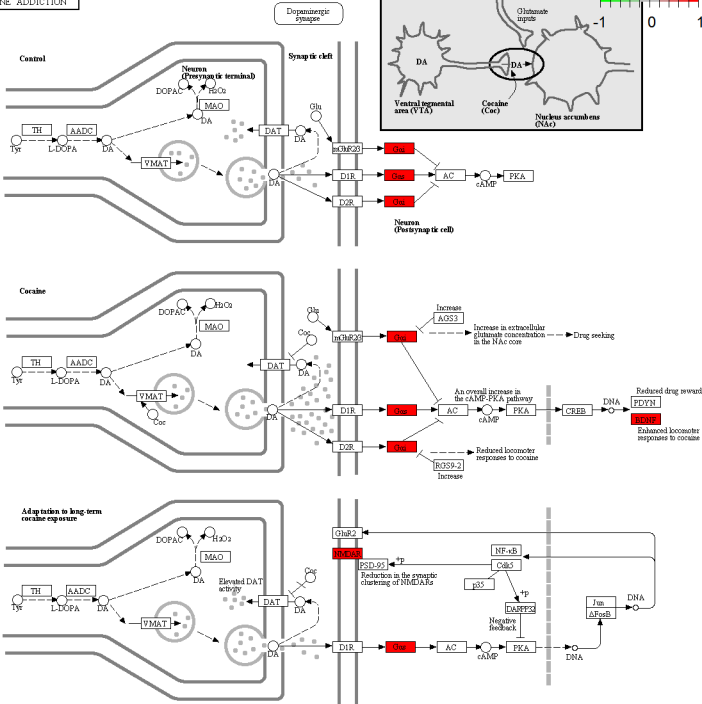

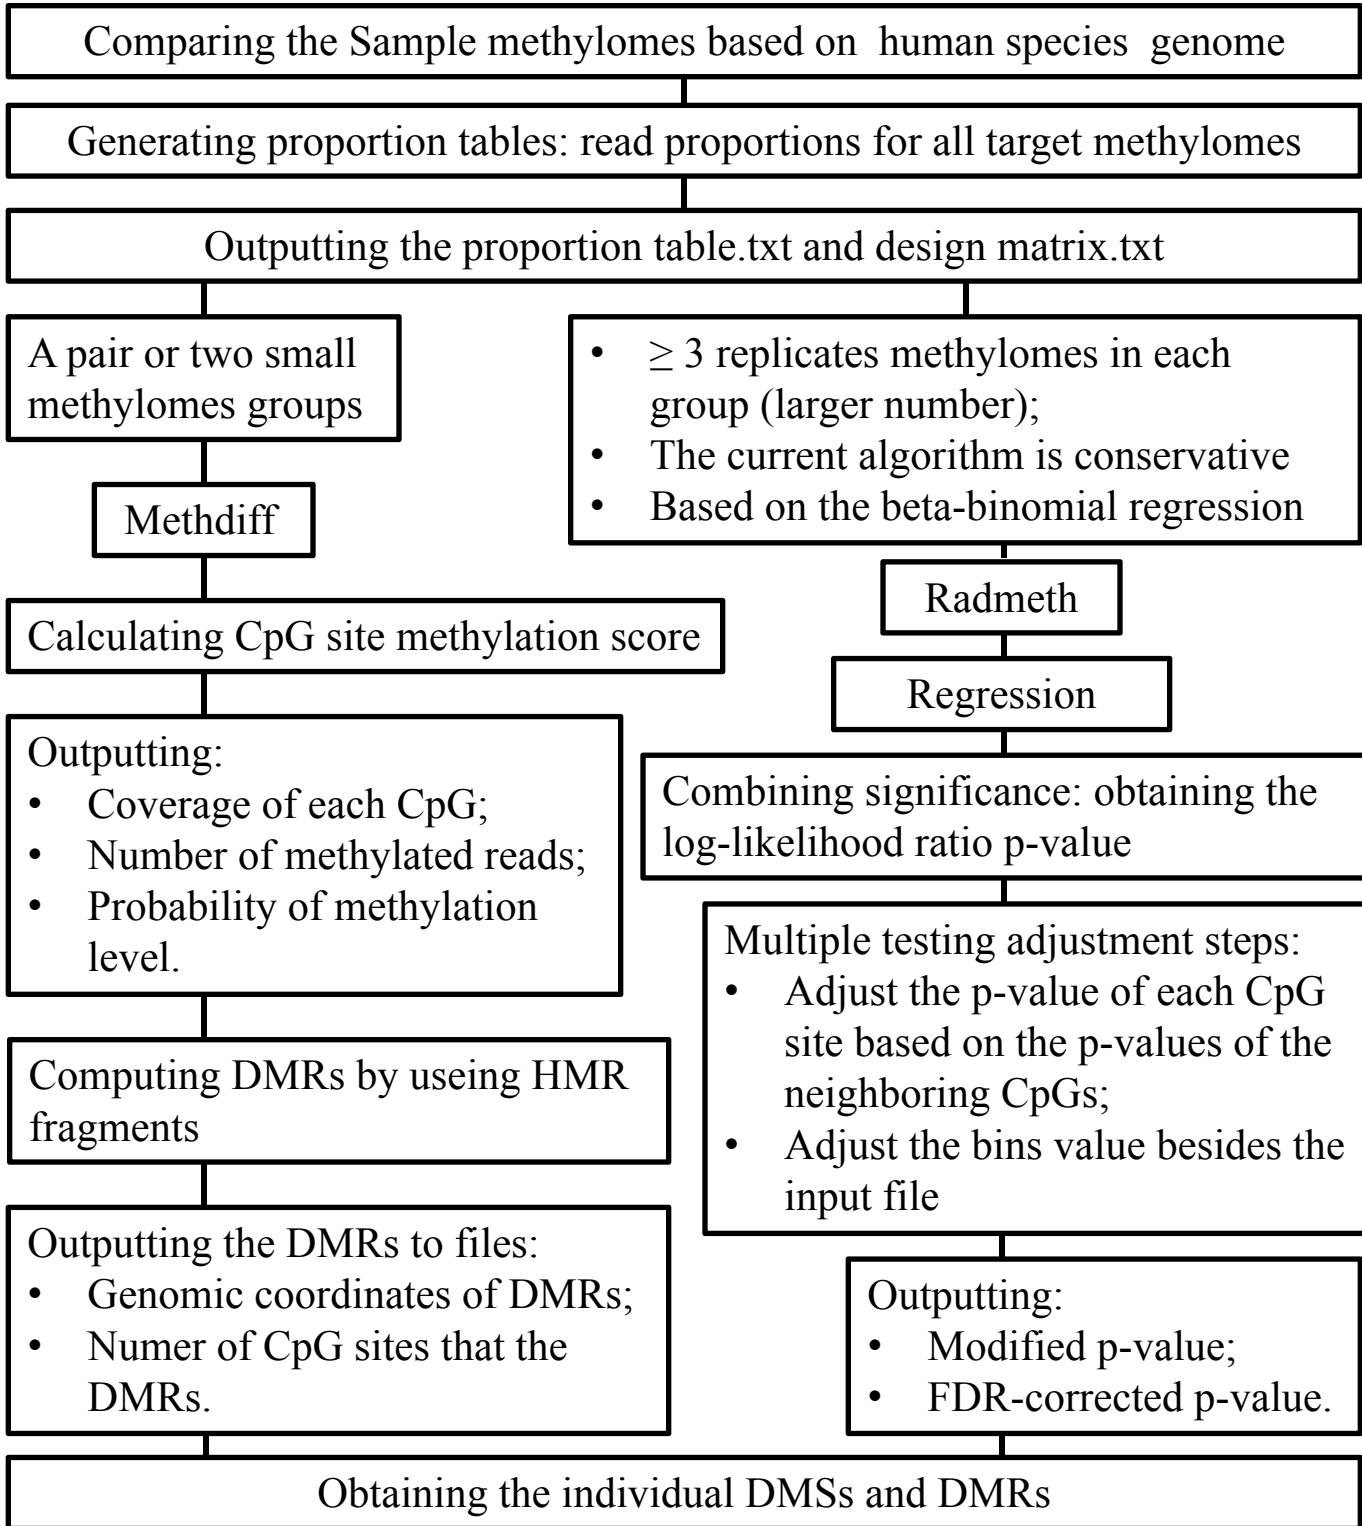

**Supplementary Table 1: The genes related DMRs between the OST-0D group and the OST-7D group by DiffMeth method analysis**

| Chr  | Start     | End       | CpG sites | Num-sites | the value of Meth-diff | Gene associated regions                                                                                                                     |
|------|-----------|-----------|-----------|-----------|------------------------|---------------------------------------------------------------------------------------------------------------------------------------------|
| chr1 | 2344140   | 2344889   | X:76      | 9         | +                      | PEX10:promoter                                                                                                                              |
| chr1 | 2424829   | 2425255   | X:22      | 8         | +                      | PLCH2:intron                                                                                                                                |
| chr1 | 3061790   | 3062910   | X:50      | 7         | +                      | PRDM16:intron                                                                                                                               |
| chr1 | 3164511   | 3164930   | X:18      | 12        | +                      | PRDM16:intron                                                                                                                               |
| chr1 | 3568495   | 3568855   | X:39      | 12        | +                      | TP73:promoter                                                                                                                               |
| chr1 | 6305277   | 6305464   | X:20      | 9         | +                      | HES3:CDS:3                                                                                                                                  |
| chr1 | 9713439   | 9713749   | X:11      | 5         | +                      | C1orf200:ncexon:2                                                                                                                           |
| chr1 | 23066258  | 23066696  | X:17      | 10        | +                      | EPHB2:intron                                                                                                                                |
| chr1 | 25257599  | 25257930  | X:25      | 8         | +                      | RUNX3:promoter                                                                                                                              |
| chr1 | 26026292  | 26027038  | X:10      | 7         | +                      | MAN1C1:intron                                                                                                                               |
| chr1 | 32135441  | 32135801  | X:11      | 5         | +                      | COL16A1:intron                                                                                                                              |
| chr1 | 39871261  | 39873833  | X:26      | 5         | +                      | MACF1:intron                                                                                                                                |
| chr1 | 47799412  | 47799486  | X:14      | 8         | +                      | CMPK1:promoter                                                                                                                              |
| chr1 | 47799412  | 47799486  | X:14      | 8         | +                      | CMPK1:promoter,CMPK1:5UTR                                                                                                                   |
| chr1 | 52455818  | 52456010  | X:13      | 5         | +                      | RAB3B:intron                                                                                                                                |
| chr1 | 89457203  | 89457641  | X:18      | 13        | +                      | RBMXL1:intron,CCBL2:intron                                                                                                                  |
| chr1 | 113051385 | 113051519 | X:21      | 7         | +                      | WNT2B:promoter                                                                                                                              |
| chr1 | 113051385 | 113051519 | X:21      | 7         | +                      | WNT2B:promoter,WNT2B:5UTR                                                                                                                   |
| chr1 | 119521629 | 119522501 | X:43      | 6         | +                      | TBX15:intron                                                                                                                                |
| chr1 | 146895262 | 146895660 | X:12      | 5         | +                      | LOC100289211:intron,FLJ39739:intron,LOC728855:intron,PPIAL4B:intron,NBPF11:intron,PPIAL4A:intron,GPR89C:intron,NBPF24:intron,PDZK1P1:intron |

|       |           |           |      |    |   |                                                  |
|-------|-----------|-----------|------|----|---|--------------------------------------------------|
| chr1  | 149604553 | 149606699 | X:70 | 5  | + | LOC728855:intron,FAM91A2:intron,HIST2H2BF:intron |
| chr1  | 156815427 | 156815904 | X:39 | 10 | + | INSRR:CDS:10,INSRR:CDS:9                         |
| chr1  | 165321402 | 165322172 | X:46 | 11 | + | LMX1A:intron                                     |
| chr1  | 165323191 | 165323732 | X:36 | 13 | + | LMX1A:intron                                     |
| chr1  | 166890456 | 166890693 | X:26 | 7  | + | ILDR2:CDS:9                                      |
| chr1  | 170640024 | 170640754 | X:29 | 5  | + | PRRX1:intron                                     |
| chr1  | 203829693 | 203830300 | X:23 | 10 | + | SNRPE:promoter                                   |
| chr1  | 214476555 | 214477131 | X:15 | 7  | + | SMYD2:intron                                     |
| chr1  | 224370938 | 224371082 | X:16 | 8  | + | DEGS1:promoter                                   |
| chr1  | 224370938 | 224371082 | X:16 | 8  | + | DEGS1:promoter,DEGS1:5UTR                        |
| chr1  | 226411357 | 226411539 | X:27 | 5  | + | MIXL1:CDS:1                                      |
| chr1  | 227922721 | 227922985 | X:32 | 6  | + | SNAP47:promoter                                  |
| chr1  | 227922721 | 227922985 | X:32 | 6  | + | SNAP47:promoter,SNAP47:5UTR                      |
| chr1  | 228401244 | 228401518 | X:33 | 6  | + | OBSCN:CDS:2                                      |
| chr1  | 235667482 | 235667755 | X:36 | 7  | + | B3GALNT2:promoter                                |
| chr1  | 235667482 | 235667755 | X:36 | 7  | + | B3GALNT2:promoter,B3GALNT2:5UTR                  |
| chr1  | 236686011 | 236686929 | X:23 | 10 | + | LGALS8:promoter                                  |
| chr1  | 236686011 | 236686929 | X:23 | 10 | + | LGALS8:promoter,LGALS8:5UTR                      |
| chr1  | 247579508 | 247580310 | X:17 | 8  | + | NLRP3:promoter                                   |
| chr10 | 6213830   | 6214153   | X:14 | 8  | + | PFKFB3:intron                                    |
| chr10 | 35736721  | 35737318  | X:14 | 6  | + | CCNY:intron                                      |
| chr10 | 49879397  | 49880157  | X:37 | 12 | + | FAM21B:intron                                    |
| chr10 | 54074079  | 54074336  | X:18 | 12 | + | DKK1:promoter                                    |
| chr10 | 54074079  | 54074336  | X:18 | 12 | + | DKK1:promoter,DKK1:5UTR                          |

|       |           |           |      |    |   |                                             |
|-------|-----------|-----------|------|----|---|---------------------------------------------|
| chr10 | 74094093  | 74094869  | X:26 | 5  | + | DNAJB12:3UTR                                |
| chr10 | 78011602  | 78012721  | X:15 | 5  | + | C10orf11:intron                             |
| chr10 | 102586628 | 102586778 | X:16 | 9  | + | PAX2:CDS:10                                 |
| chr10 | 103534171 | 103534715 | X:19 | 6  | + | FGF8:promoter                               |
| chr10 | 103534171 | 103534715 | X:19 | 6  | + | FGF8:promoter,FGF8:5UTR                     |
| chr10 | 121578172 | 121578402 | X:28 | 11 | + | INPP5F:promoter                             |
| chr10 | 125447737 | 125450617 | X:19 | 6  | + | GPR26:3UTR                                  |
| chr10 | 126840910 | 126841148 | X:16 | 6  | + | CTBP2:intron                                |
| chr10 | 134980773 | 134980953 | X:17 | 5  | + | KNDC1:CDS:2                                 |
| chr11 | 1948028   | 1949013   | X:29 | 7  | + | TNNT3:intron                                |
| chr11 | 2159301   | 2159451   | X:21 | 6  | + | IGF2:intron,INS-IGF2:intron                 |
| chr11 | 2720829   | 2721027   | X:29 | 7  | + | KCNQ1OT1:ncexon:1                           |
| chr11 | 13032404  | 13032746  | X:20 | 8  | + | RASSF10:CDS:1                               |
| chr11 | 13689903  | 13690088  | X:19 | 15 | + | FAR1:promoter                               |
| chr11 | 27722013  | 27722332  | X:38 | 6  | + | BDNF:promoter                               |
| chr11 | 27722013  | 27722332  | X:38 | 6  | + | BDNF:promoter,BDNF:5UTR,BDNF:5UTR           |
| chr11 | 64120582  | 64120895  | X:17 | 6  | + | CCDC88B:CDS:21,CCDC88B:CDS:22               |
| chr11 | 66193851  | 66194008  | X:13 | 6  | + | NPAS4:3UTR                                  |
| chr11 | 69518419  | 69518639  | X:26 | 6  | + | FGF19:CDS:1                                 |
| chr12 | 3345678   | 3346257   | X:14 | 5  | + | TSPAN9:intron                               |
| chr12 | 42983100  | 42983268  | X:15 | 11 | + | PRICKLE1:5UTR                               |
| chr12 | 49208212  | 49208388  | X:15 | 8  | + | CACNB3:promoter,CACNB3:promoter             |
| chr12 | 49208212  | 49208388  | X:15 | 8  | + | CACNB3:promoter,CACNB3:promoter,CACNB3:5UTR |
| chr12 | 58239441  | 58239680  | X:23 | 5  | + | CTDSP2:intron                               |

|       |           |           |      |    |   |                                                     |
|-------|-----------|-----------|------|----|---|-----------------------------------------------------|
| chr12 | 94580367  | 94580738  | X:19 | 5  | + | PLXNC1:intron                                       |
| chr12 | 115109568 | 115109701 | X:12 | 6  | + | TBX3:CDS:7                                          |
| chr12 | 115112443 | 115112608 | X:18 | 6  | + | TBX3:CDS:6                                          |
| chr12 | 120105873 | 120106085 | X:19 | 7  | + | PRKAB1:5UTR                                         |
| chr12 | 124242063 | 124242821 | X:10 | 7  | + | ATP6V0A2:CDS:20                                     |
| chr12 | 124873802 | 124874003 | X:17 | 10 | + | NCOR2:intron                                        |
| chr12 | 132628607 | 132628711 | X:19 | 5  | + | NOC4L:promoter                                      |
| chr13 | 78272441  | 78272829  | X:44 | 6  | + | SLAIN1:promoter                                     |
| chr13 | 109806752 | 109808000 | X:20 | 8  | + | MYO16:intron                                        |
| chr13 | 110953975 | 110954437 | X:13 | 6  | + | COL4A1:intron                                       |
| chr13 | 114565770 | 114565961 | X:17 | 7  | + | GAS6:intron                                         |
| chr14 | 24780256  | 24780463  | X:24 | 13 | + | LTB4R:promoter                                      |
| chr14 | 24780256  | 24780463  | X:24 | 13 | + | LTB4R:promoter,CIDEB:5UTR                           |
| chr14 | 55139594  | 55140493  | X:11 | 5  | + | SAMD4A:intron                                       |
| chr14 | 74222353  | 74223554  | X:18 | 5  | + | C14orf43:intron                                     |
| chr14 | 97263704  | 97264018  | X:51 | 15 | + | VRK1:promoter                                       |
| chr14 | 97263704  | 97264018  | X:51 | 15 | + | VRK1:promoter,VRK1:5UTR                             |
| chr14 | 102430943 | 102431130 | X:24 | 7  | + | DYNC1H1:promoter                                    |
| chr14 | 102430943 | 102431130 | X:24 | 7  | + | DYNC1H1:promoter,DYNC1H1:5UTR                       |
| chr15 | 20710460  | 20711337  | X:42 | 5  | + | HERC2P3:ncexon:2                                    |
| chr15 | 25200003  | 25200775  | X:54 | 13 | + | SNRPN:promoter,SNURF:promoter                       |
| chr15 | 25200003  | 25200775  | X:54 | 13 | + | SNRPN:promoter,SNURF:promoter,SNRPN:5UTR,SNURF:5UTR |
| chr15 | 40399722  | 40400614  | X:18 | 5  | + | BMF:promoter                                        |
| chr15 | 40399722  | 40400614  | X:18 | 5  | + | BMF:promoter,BMF:5UTR                               |

|       |           |           |      |    |   |                                 |
|-------|-----------|-----------|------|----|---|---------------------------------|
| chr15 | 41061478  | 41062200  | X:22 | 5  | + | C15orf62:promoter               |
| chr15 | 41061478  | 41062200  | X:22 | 5  | + | C15orf62:promoter,C15orf62:5UTR |
| chr15 | 41787761  | 41788038  | X:25 | 5  | + | ITPKA:intron                    |
| chr15 | 45315202  | 45315418  | X:16 | 9  | + | SORD:promoter                   |
| chr15 | 45315202  | 45315418  | X:16 | 9  | + | SORD:promoter,SORD:5UTR         |
| chr15 | 67053256  | 67054632  | X:28 | 6  | + | SMAD6:intron                    |
| chr15 | 74427108  | 74427865  | X:40 | 9  | + | ISLR2:CDS:1                     |
| chr15 | 76634317  | 76634559  | X:14 | 12 | + | ISL2:3UTR                       |
| chr15 | 86314770  | 86315413  | X:12 | 5  | + | KLHL25:intron                   |
| chr15 | 100273533 | 100273946 | X:44 | 9  | + | LYSMD4:promoter                 |
| chr15 | 100273533 | 100273946 | X:44 | 9  | + | LYSMD4:promoter,LYSMD4:5UTR     |
| chr16 | 216315    | 216625    | X:32 | 17 | + | HBM:CDS:2,HBM:CDS:3             |
| chr16 | 433504    | 434082    | X:25 | 5  | + | LOC100134368:intron             |
| chr16 | 672297    | 672576    | X:25 | 10 | + | RAB40C:intron                   |
| chr16 | 1204446   | 1204878   | X:21 | 6  | + | CACNA1H:intron                  |
| chr16 | 2097589   | 2097729   | X:13 | 11 | + | TSC2:promoter                   |
| chr16 | 3304362   | 3304625   | X:24 | 6  | + | MEFV:CDS:2                      |
| chr16 | 24863072  | 24863842  | X:14 | 6  | + | SLC5A11:intron                  |
| chr16 | 27829315  | 27829980  | X:19 | 6  | + | GSG1L:intron                    |
| chr16 | 28936431  | 28936492  | X:11 | 9  | + | RABEP2:promoter                 |
| chr16 | 28936431  | 28936492  | X:11 | 9  | + | RABEP2:promoter,RABEP2:5UTR     |
| chr16 | 55364261  | 55365019  | X:30 | 11 | + | IRX6:3UTR                       |
| chr16 | 66613134  | 66613355  | X:32 | 7  | + | CMTM2:promoter                  |
| chr16 | 66613134  | 66613355  | X:32 | 7  | + | CMTM2:promoter,CMTM2:5UTR       |



|       |          |          |      |    |   |                               |
|-------|----------|----------|------|----|---|-------------------------------|
| chr16 | 78537144 | 78538574 | X:11 | 5  | + | WVOX:intron                   |
| chr16 | 85648027 | 85648263 | X:16 | 5  | + | KIAA0182:intron               |
| chr16 | 86612451 | 86612589 | X:13 | 5  | + | FOXL1:CDS:1                   |
| chr16 | 88540162 | 88540349 | X:14 | 5  | + | ZFPM1:intron                  |
| chr17 | 1969792  | 1970573  | X:18 | 5  | + | SMG6:intron                   |
| chr17 | 6347681  | 6347790  | X:11 | 8  | + | FAM64A:promoter               |
| chr17 | 6347681  | 6347790  | X:11 | 8  | + | FAM64A:promoter,FAM64A:5UTR   |
| chr17 | 7196058  | 7197162  | X:18 | 6  | + | YBX2:CDS:2                    |
| chr17 | 11900526 | 11900821 | X:37 | 10 | + | ZNF18:promoter                |
| chr17 | 11900526 | 11900821 | X:37 | 10 | + | ZNF18:promoter,ZNF18:5UTR     |
| chr17 | 18585445 | 18585650 | X:17 | 10 | + | ZNF286B:promoter              |
| chr17 | 18585445 | 18585650 | X:17 | 10 | + | ZNF286B:promoter,ZNF286B:5UTR |
| chr17 | 37380676 | 37381143 | X:37 | 21 | + | STAC2:intron                  |
| chr17 | 59490308 | 59490809 | X:26 | 6  | + | C17orf82:ncexon:1             |
| chr17 | 77395836 | 77396488 | X:24 | 7  | + | RBFOX3:intron                 |
| chr17 | 79093142 | 79093348 | X:26 | 9  | + | AATK:CDS:11                   |
| chr17 | 79670077 | 79670280 | X:30 | 12 | + | MRPL12:promoter               |
| chr17 | 80290051 | 80290226 | X:13 | 6  | + | SECTM1:intron                 |
| chr17 | 80605959 | 80606237 | X:31 | 5  | + | WDR45L:5UTR                   |
| chr18 | 20715369 | 20715469 | X:14 | 5  | + | CABLES1:intron                |
| chr18 | 21083110 | 21083275 | X:15 | 12 | + | C18orf8:promoter              |
| chr19 | 1009580  | 1009797  | X:14 | 5  | + | GRIN3B:CDS:9                  |
| chr19 | 1465410  | 1465639  | X:26 | 5  | + | APC2:CDS:14                   |
| chr19 | 2241107  | 2241325  | X:15 | 5  | + | SF3A2:intron                  |

|       |          |          |      |    |   |                                                                                                                                                          |
|-------|----------|----------|------|----|---|----------------------------------------------------------------------------------------------------------------------------------------------------------|
| chr19 | 3668289  | 3668603  | X:14 | 6  | + | PIP5K1C:intron                                                                                                                                           |
| chr19 | 4368257  | 4369372  | X:32 | 6  | + | SH3GL1:intron                                                                                                                                            |
| chr19 | 4976449  | 4976931  | X:21 | 9  | + | KDM4B:intron                                                                                                                                             |
| chr19 | 5340953  | 5341042  | X:14 | 9  | + | PTPRS:promoter                                                                                                                                           |
| chr19 | 6750259  | 6750505  | X:15 | 6  | + | TRIP10:CDS:12                                                                                                                                            |
| chr19 | 12983791 | 12984483 | X:45 | 10 | + | MAST1:CDS:25,MAST1:CDS:26                                                                                                                                |
| chr19 | 14260390 | 14260774 | X:19 | 6  | + | LPHN1:3UTR                                                                                                                                               |
| chr19 | 18548703 | 18548888 | X:21 | 6  | + | ISYNA1:promoter                                                                                                                                          |
| chr19 | 18548703 | 18548888 | X:21 | 6  | + | ISYNA1:promoter,ISYNA1:5UTR                                                                                                                              |
| chr19 | 30866169 | 30866489 | X:38 | 11 | + | ZNF536:intron                                                                                                                                            |
| chr19 | 34113283 | 34113373 | X:14 | 5  | + | CHST8:intron                                                                                                                                             |
| chr19 | 40366340 | 40366575 | X:26 | 6  | + | FCGBP:CDS:30                                                                                                                                             |
| chr19 | 40421120 | 40421435 | X:32 | 8  | + | FCGBP:CDS:5                                                                                                                                              |
| chr19 | 46196061 | 46196194 | X:11 | 8  | + | SNRPD2:promoter                                                                                                                                          |
| chr19 | 48946126 | 48946668 | X:93 | 7  | + | GRIN2D:CDS:12                                                                                                                                            |
| chr19 | 49561304 | 49561963 | X:26 | 7  | + | SNAR-A10:intron,SNAR-A7:intron,SNAR-A3:intron,SNAR-A4:intron,SNAR-A5:intron,SNAR-A14:intron,SNAR-A8:intron,SNAR-A6:intron,SNAR-A11:intron,SNAR-A9:intron |
| chr19 | 49935752 | 49935999 | X:23 | 6  | + | SLC17A7:CDS:9                                                                                                                                            |
| chr19 | 51486749 | 51487309 | X:16 | 7  | + | KLK7:promoter                                                                                                                                            |
| chr19 | 51486749 | 51487309 | X:16 | 7  | + | KLK7:promoter,KLK7:5UTR,KLK7:5UTR                                                                                                                        |
| chr19 | 55763066 | 55763326 | X:11 | 6  | + | PPP6R1:intron                                                                                                                                            |
| chr19 | 58545285 | 58545420 | X:17 | 8  | + | ZSCAN1:promoter                                                                                                                                          |
| chr19 | 58740222 | 58740358 | X:16 | 9  | + | ZNF544:promoter                                                                                                                                          |
| chr19 | 58740222 | 58740358 | X:16 | 9  | + | ZNF544:promoter,ZNF544:5UTR                                                                                                                              |

|       |           |           |      |    |   |                              |
|-------|-----------|-----------|------|----|---|------------------------------|
| chr19 | 58867468  | 58867766  | X:36 | 6  | + | ZNF497:CDS:1                 |
| chr19 | 58879211  | 58879349  | X:18 | 7  | + | ZNF837:CDS:1                 |
| chr2  | 66672616  | 66673226  | X:42 | 12 | + | MEIS1:intron                 |
| chr2  | 74729802  | 74729915  | X:10 | 5  | + | LBX2:CDS:1                   |
| chr2  | 74781352  | 74781451  | X:12 | 5  | + | DOK1:promoter,LOXL3:promoter |
| chr2  | 88124677  | 88125044  | X:42 | 13 | + | RGPD2:intron,RGPD1:intron    |
| chr2  | 91844804  | 91845379  | X:21 | 5  | + | LOC654342:intron             |
| chr2  | 95787634  | 95787789  | X:20 | 13 | + | MRPS5:promoter               |
| chr2  | 95787634  | 95787789  | X:20 | 13 | + | MRPS5:promoter,MRPS5:5UTR    |
| chr2  | 120189353 | 120189544 | X:27 | 5  | + | TMEM37:promoter              |
| chr2  | 120189353 | 120189544 | X:27 | 5  | + | TMEM37:promoter,TMEM37:5UTR  |
| chr2  | 130691761 | 130691931 | X:17 | 12 | + | LOC389033:ncexon:1           |
| chr2  | 133014647 | 133014966 | X:26 | 6  | + | MIR663B:ncexon:1             |
| chr2  | 171570943 | 171571199 | X:26 | 6  | + | SP5:promoter                 |
| chr2  | 177029537 | 177029757 | X:21 | 6  | + | HOXD3:intron                 |
| chr2  | 177036436 | 177036608 | X:18 | 5  | + | HOXD3:CDS:2                  |
| chr2  | 192542655 | 192542828 | X:18 | 12 | + | OBFC2A:promoter              |
| chr2  | 192542655 | 192542828 | X:18 | 12 | + | OBFC2A:promoter,OBFC2A:5UTR  |
| chr2  | 200330906 | 200332521 | X:33 | 10 | + | SATB2:intron                 |
| chr2  | 223917511 | 223917734 | X:13 | 6  | + | KCNE4:promoter               |
| chr2  | 223917511 | 223917734 | X:13 | 6  | + | KCNE4:promoter,KCNE4:5UTR    |
| chr2  | 228337096 | 228337435 | X:39 | 10 | + | AGFG1:5UTR                   |
| chr20 | 15897688  | 15898740  | X:10 | 5  | + | MACROD2:intron               |
| chr20 | 21685400  | 21685841  | X:20 | 8  | + | PAX1:promoter                |

|       |          |          |      |    |   |                             |
|-------|----------|----------|------|----|---|-----------------------------|
| chr20 | 30135112 | 30135362 | X:21 | 6  | + | PSIMCT-1:ncexon:1           |
| chr20 | 37434950 | 37435127 | X:18 | 8  | + | PPP1R16B:intron             |
| chr20 | 57465119 | 57465388 | X:31 | 6  | + | GNAS:intron                 |
| chr20 | 57766930 | 57767281 | X:39 | 5  | + | ZNF831:CDS:1                |
| chr20 | 62120430 | 62120605 | X:16 | 5  | + | EEF1A2:CDS:6                |
| chr21 | 15588309 | 15588491 | X:20 | 6  | + | RBM11:promoter              |
| chr21 | 15588309 | 15588491 | X:20 | 6  | + | RBM11:promoter,RBM11:5UTR   |
| chr21 | 34443296 | 34443508 | X:17 | 7  | + | OLIG1:CDS:1                 |
| chr21 | 43812801 | 43813768 | X:23 | 6  | + | TMPRSS3:intron              |
| chr21 | 45564710 | 45565141 | X:16 | 5  | + | C21orf33:CDS:6              |
| chr21 | 46826425 | 46827096 | X:27 | 6  | + | COL18A1:intron              |
| chr22 | 18064009 | 18064263 | X:14 | 5  | + | SLC25A18:CDS:3              |
| chr22 | 36766602 | 36767424 | X:15 | 6  | + | MYH9:intron                 |
| chr22 | 37261500 | 37261766 | X:13 | 6  | + | NCF4:intron                 |
| chr22 | 42084782 | 42084933 | X:16 | 16 | + | NHP2L1:promoter             |
| chr22 | 42084782 | 42084933 | X:16 | 16 | + | NHP2L1:promoter,NHP2L1:5UTR |
| chr22 | 48948274 | 48948708 | X:16 | 5  | + | FAM19A5:intron              |
| chr3  | 28390613 | 28390932 | X:24 | 9  | + | AZI2:promoter               |
| chr3  | 28390613 | 28390932 | X:24 | 9  | + | AZI2:promoter,AZI2:5UTR     |
| chr3  | 45837675 | 45837847 | X:18 | 10 | + | SLC6A20:CDS:1               |
| chr3  | 46975614 | 46977038 | X:16 | 6  | + | CCDC12:intron               |
| chr3  | 47844666 | 47844836 | X:14 | 8  | + | DHX30:5UTR                  |
| chr3  | 50273544 | 50273744 | X:26 | 9  | + | GNAI2:promoter              |
| chr3  | 50273544 | 50273744 | X:26 | 9  | + | GNAI2:promoter,GNAI2:5UTR   |

|      |           |           |      |    |   |                                       |
|------|-----------|-----------|------|----|---|---------------------------------------|
| chr3 | 129305777 | 129306109 | X:13 | 5  | + | PLXND1:intron                         |
| chr3 | 133502608 | 133502725 | X:10 | 5  | + | SRPRB:promoter                        |
| chr3 | 147122696 | 147123473 | X:22 | 8  | + | ZIC4:promoter,ZIC4:promoter           |
| chr3 | 147122696 | 147123473 | X:22 | 8  | + | ZIC4:promoter,ZIC4:promoter,ZIC4:5UTR |
| chr4 | 1188632   | 1188760   | X:15 | 11 | + | SPON2:intron                          |
| chr4 | 13529671  | 13530416  | X:29 | 12 | + | LOC285547:ncexon:3                    |
| chr4 | 13542995  | 13543676  | X:23 | 6  | + | NKX3-2:CDS:2                          |
| chr4 | 57458843  | 57458974  | X:17 | 6  | + | THEGL:intron                          |
| chr4 | 81110244  | 81110530  | X:20 | 5  | + | PRDM8:intron                          |
| chr4 | 166033652 | 166033878 | X:22 | 6  | + | TMEM192:intron                        |
| chr4 | 187071281 | 187071868 | X:28 | 5  | + | FAM149A:intron                        |
| chr4 | 187124575 | 187124894 | X:10 | 7  | + | CYP4V2:intron                         |
| chr5 | 2748664   | 2748828   | X:21 | 9  | + | IRX2:CDS:3                            |
| chr5 | 10649619  | 10650054  | X:51 | 9  | + | ANKRD33B:CDS:4                        |
| chr5 | 31937105  | 31937829  | X:12 | 5  | + | PDZD2:intron                          |
| chr5 | 37249426  | 37249598  | X:23 | 18 | + | C5orf42:promoter                      |
| chr5 | 37249426  | 37249598  | X:23 | 18 | + | C5orf42:promoter,C5orf42:5UTR         |
| chr5 | 77944712  | 77945044  | X:43 | 13 | + | LHFPL2:promoter                       |
| chr5 | 92923024  | 92923551  | X:16 | 5  | + | NR2F1:intron                          |
| chr5 | 92924343  | 92926913  | X:57 | 11 | + | NR2F1:intron                          |
| chr5 | 112257909 | 112258099 | X:30 | 9  | + | REEP5:promoter                        |
| chr5 | 112257909 | 112258099 | X:30 | 9  | + | REEP5:promoter,REEP5:5UTR             |
| chr5 | 122434853 | 122435523 | X:47 | 7  | + | PRDM6:CDS:2                           |
| chr5 | 133513400 | 133513712 | X:14 | 6  | + | SKP1:promoter                         |

|      |           |           |      |    |   |                                                                                                                                                  |
|------|-----------|-----------|------|----|---|--------------------------------------------------------------------------------------------------------------------------------------------------|
| chr5 | 135416032 | 135416725 | X:34 | 5  | + | VTRNA2-1:ncexon:1                                                                                                                                |
| chr5 | 140242203 | 140242414 | X:24 | 6  | + | PCDHA9:intron,PCDHA6:intron,PCDHA8:intron,PCDHA5:intron,PCDHA2:intron,PCDHA4:intron,<br>PCDHA10:intron,PCDHA1:intron,PCDHA7:intron,PCDHA3:intron |
| chr5 | 159688055 | 159688772 | X:19 | 5  | + | CCNJL:intron                                                                                                                                     |
| chr5 | 171433660 | 171433781 | X:11 | 5  | + | FBXW11:promoter                                                                                                                                  |
| chr5 | 171433660 | 171433781 | X:11 | 5  | + | FBXW11:promoter,FBXW11:5UTR                                                                                                                      |
| chr5 | 171614782 | 171614925 | X:16 | 9  | + | STK10:CDS:1                                                                                                                                      |
| chr5 | 180632027 | 180632401 | X:42 | 24 | + | TRIM7:promoter                                                                                                                                   |
| chr5 | 180632027 | 180632401 | X:42 | 24 | + | TRIM7:promoter,TRIM7:5UTR                                                                                                                        |
| chr6 | 12291677  | 12292901  | X:18 | 6  | + | EDN1:CDS:2                                                                                                                                       |
| chr6 | 18122832  | 18123164  | X:28 | 11 | + | NHLRC1:promoter                                                                                                                                  |
| chr6 | 18122832  | 18123164  | X:28 | 11 | + | NHLRC1:promoter,NHLRC1:5UTR                                                                                                                      |
| chr6 | 24495219  | 24495442  | X:30 | 7  | + | ALDH5A1:promoter                                                                                                                                 |
| chr6 | 24495219  | 24495442  | X:30 | 7  | + | ALDH5A1:promoter,ALDH5A1:5UTR                                                                                                                    |
| chr6 | 27441662  | 27441892  | X:13 | 9  | + | ZNF184:promoter                                                                                                                                  |
| chr6 | 34113719  | 34114207  | X:18 | 5  | + | GRM4:promoter                                                                                                                                    |
| chr6 | 34113719  | 34114207  | X:18 | 5  | + | GRM4:promoter,GRM4:5UTR                                                                                                                          |
| chr6 | 74008935  | 74009455  | X:41 | 6  | + | KHDC1:intron,C6orf147:intron                                                                                                                     |
| chr6 | 158438166 | 158438463 | X:14 | 5  | + | SYNJ2:promoter                                                                                                                                   |
| chr6 | 158438166 | 158438463 | X:14 | 5  | + | SYNJ2:promoter,SYNJ2:5UTR                                                                                                                        |
| chr6 | 159465764 | 159466690 | X:18 | 6  | + | TAGAP:promoter                                                                                                                                   |
| chr6 | 159465764 | 159466690 | X:18 | 6  | + | TAGAP:promoter,TAGAP:5UTR                                                                                                                        |
| chr6 | 160427262 | 160427616 | X:23 | 13 | + | IGF2R:intron                                                                                                                                     |
| chr7 | 1094657   | 1094970   | X:20 | 7  | + | C7orf50:intron                                                                                                                                   |

|      |           |           |      |    |   |                                                |
|------|-----------|-----------|------|----|---|------------------------------------------------|
| chr7 | 1272905   | 1273301   | X:42 | 14 | + | UNCX:CDS:1,UNCX:CDS:2                          |
| chr7 | 4831752   | 4832660   | X:72 | 5  | + | KIAA0415:3UTR                                  |
| chr7 | 5569549   | 5569825   | X:43 | 5  | + | ACTB:promoter                                  |
| chr7 | 5821071   | 5821244   | X:20 | 15 | + | RNF216:5UTR                                    |
| chr7 | 27206427  | 27206711  | X:14 | 6  | + | HOXA10-HOXA9:intron                            |
| chr7 | 40174597  | 40174734  | X:14 | 6  | + | C7orf11:promoter,C7orf10:promoter              |
| chr7 | 40174597  | 40174734  | X:14 | 6  | + | C7orf11:promoter,C7orf10:promoter,C7orf10:5UTR |
| chr7 | 66532130  | 66532662  | X:10 | 5  | + | TYW1:CDS:10                                    |
| chr7 | 87257532  | 87257703  | X:21 | 5  | + | RUNDC3B:promoter                               |
| chr7 | 94023618  | 94023924  | X:18 | 5  | + | COL1A2:promoter                                |
| chr7 | 94023618  | 94023924  | X:18 | 5  | + | COL1A2:promoter,COL1A2:5UTR                    |
| chr7 | 96631679  | 96632140  | X:20 | 9  | + | DLX6-AS1:intron                                |
| chr7 | 99036585  | 99036945  | X:38 | 13 | + | CPSF4:promoter,PTCD1:promoter                  |
| chr7 | 99036585  | 99036945  | X:38 | 13 | + | CPSF4:promoter,PTCD1:promoter,CPSF4:5UTR       |
| chr7 | 100203398 | 100203599 | X:18 | 6  | + | PCOLCE:CDS:5                                   |
| chr7 | 100823267 | 100823455 | X:16 | 6  | + | NAT16:5UTR                                     |
| chr7 | 101049158 | 101049511 | X:15 | 6  | + | EMID2:intron                                   |
| chr7 | 127225542 | 127225723 | X:18 | 10 | + | GCC1:promoter                                  |
| chr7 | 127225542 | 127225723 | X:18 | 10 | + | GCC1:promoter,GCC1:5UTR                        |
| chr7 | 130130739 | 130130995 | X:26 | 11 | + | MEST:promoter                                  |
| chr7 | 145945389 | 145946093 | X:22 | 5  | + | CNTNAP2:intron                                 |
| chr7 | 157406375 | 157406737 | X:30 | 6  | + | PTPRN2:intron                                  |
| chr7 | 157576860 | 157577667 | X:29 | 5  | + | PTPRN2:intron                                  |
| chr7 | 157668518 | 157669348 | X:21 | 6  | + | PTPRN2:intron                                  |

|      |           |           |      |    |   |                               |
|------|-----------|-----------|------|----|---|-------------------------------|
| chr8 | 1496930   | 1497185   | X:35 | 22 | + | DLGAP2:CDS:1                  |
| chr8 | 1950836   | 1951059   | X:32 | 6  | + | KBTBD11:CDS:1                 |
| chr8 | 8750331   | 8750534   | X:22 | 9  | + | MFHAS1:CDS:1                  |
| chr8 | 11272335  | 11272886  | X:10 | 5  | + | C8orf12:intron                |
| chr8 | 22635193  | 22635576  | X:13 | 6  | + | PEBP4:intron                  |
| chr8 | 25896195  | 25897234  | X:25 | 5  | + | EBF2:intron                   |
| chr9 | 34637478  | 34637802  | X:36 | 8  | + | SIGMAR1:promoter              |
| chr9 | 34637478  | 34637802  | X:36 | 8  | + | SIGMAR1:promoter,SIGMAR1:5UTR |
| chr9 | 90112861  | 90113035  | X:18 | 5  | + | DAPK1:promoter                |
| chr9 | 90112861  | 90113035  | X:18 | 5  | + | DAPK1:promoter,DAPK1:5UTR     |
| chr9 | 123476699 | 123476903 | X:29 | 9  | + | MEGF9:promoter                |
| chr9 | 123476699 | 123476903 | X:29 | 9  | + | MEGF9:promoter,MEGF9:5UTR     |
| chr9 | 126692428 | 126692758 | X:30 | 9  | + | DENND1A:promoter              |
| chr9 | 130684061 | 130684177 | X:15 | 15 | + | PIP5KL1:CDS:4                 |
| chr9 | 131012953 | 131013323 | X:36 | 8  | + | DNM1:CDS:20                   |
| chr9 | 131939245 | 131939446 | X:22 | 5  | + | IER5L:CDS:1                   |
| chr9 | 133320154 | 133320631 | X:48 | 10 | + | ASS1:promoter                 |
| chr9 | 133320154 | 133320631 | X:48 | 10 | + | ASS1:promoter,ASS1:5UTR       |
| chr9 | 138078062 | 138079193 | X:30 | 5  | + | LOC401557:ncexon:3            |
| chrX | 16737358  | 16737799  | X:28 | 12 | + | SYAP1:promoter                |
| chrX | 16737358  | 16737799  | X:28 | 12 | + | SYAP1:promoter,SYAP1:5UTR     |
| chrX | 19362105  | 19362392  | X:29 | 5  | + | PDHA1:promoter                |
| chrX | 19362105  | 19362392  | X:29 | 5  | + | PDHA1:promoter,PDHA1:5UTR     |
| chrX | 21392042  | 21392377  | X:36 | 5  | + | CNKS2:promoter                |



|       |           |           |      |    |   |                                                   |
|-------|-----------|-----------|------|----|---|---------------------------------------------------|
| chrX  | 100603685 | 100603839 | X:19 | 11 | + | TIMM8A:promoter                                   |
| chrX  | 100603685 | 100603839 | X:19 | 11 | + | TIMM8A:promoter,TIMM8A:5UTR                       |
| chrX  | 153043745 | 153044220 | X:19 | 6  | + | PLXNB3:CDS:32,PLXNB3:CDS:33,PLXNB3:CDS:34         |
| chr1  | 3154748   | 3155412   | X:30 | 7  | + | PRDM16:intron                                     |
| chr1  | 6531040   | 6531196   | X:16 | 5  | + | PLEKHG5:CDS:12                                    |
| chr1  | 17092499  | 17092748  | X:10 | 7  | + | MIR3675:intron                                    |
| chr1  | 21864787  | 21864977  | X:14 | 5  | + | ALPL:intron                                       |
| chr1  | 23720292  | 23720842  | X:16 | 6  | + | TCEA3:CDS:8                                       |
| chr1  | 25894682  | 25895381  | X:22 | 5  | + | LDLRAP1:3UTR                                      |
| chr1  | 61914545  | 61915001  | X:11 | 6  | + | NFIA:intron                                       |
| chr1  | 92216106  | 92217483  | X:11 | 6  | + | TGFBR3:intron                                     |
| chr1  | 160054294 | 160054373 | X:13 | 5  | + | KCNJ9:CDS:1                                       |
| chr1  | 174843541 | 174844010 | X:10 | 6  | + | RABGAP1L:promoter,RABGAP1L:promoter               |
| chr1  | 174843541 | 174844010 | X:10 | 6  | + | RABGAP1L:promoter,RABGAP1L:promoter,RABGAP1L:5UTR |
| chr1  | 198901566 | 198903300 | X:12 | 5  | + | LOC100131234:intron                               |
| chr1  | 204653481 | 204653718 | X:11 | 5  | + | LRRN2:intron                                      |
| chr1  | 245462133 | 245462493 | X:13 | 7  | + | KIF26B:intron                                     |
| chr10 | 21144399  | 21145514  | X:10 | 5  | + | NEBL:intron                                       |
| chr10 | 24416323  | 24417665  | X:13 | 5  | + | KIAA1217:intron                                   |
| chr10 | 30316299  | 30316709  | X:16 | 9  | + | KIAA1462:CDS:2                                    |
| chr10 | 85955263  | 85956268  | X:23 | 7  | + | CDHR1:CDS:2,CDHR1:CDS:3                           |
| chr10 | 114712357 | 114712663 | X:19 | 6  | + | TCF7L2:intron                                     |
| chr10 | 124907550 | 124907762 | X:26 | 7  | + | HMX2:promoter                                     |
| chr10 | 124907550 | 124907762 | X:26 | 7  | + | HMX2:promoter,HMX2:5UTR                           |

|       |           |           |      |    |   |                         |
|-------|-----------|-----------|------|----|---|-------------------------|
| chr10 | 131749397 | 131749973 | X:20 | 6  | + | EBF3:intron             |
| chr11 | 17786117  | 17786797  | X:21 | 6  | + | KCNC1:intron            |
| chr11 | 44325258  | 44325886  | X:33 | 12 | + | ALX4:intron             |
| chr11 | 46384634  | 46385376  | X:25 | 8  | + | DGKZ:intron             |
| chr11 | 46401392  | 46401701  | X:17 | 5  | + | MDK:promoter            |
| chr11 | 61481086  | 61481638  | X:14 | 5  | + | DAGLA:intron            |
| chr11 | 66062246  | 66062366  | X:20 | 6  | + | TMEM151A:CDS:2          |
| chr11 | 68147850  | 68148079  | X:17 | 6  | + | LRP5:intron             |
| chr11 | 101783582 | 101785113 | X:10 | 5  | + | KIAA1377:promoter       |
| chr11 | 122597619 | 122598238 | X:14 | 6  | + | UBASH3B:intron          |
| chr12 | 2339324   | 2339614   | X:30 | 9  | + | CACNA1C:intron          |
| chr12 | 49943271  | 49943434  | X:17 | 5  | + | KCNH3:CDS:9             |
| chr12 | 94659159  | 94659830  | X:11 | 5  | + | PLXNC1:intron           |
| chr12 | 115107577 | 115109504 | X:28 | 7  | + | TBX3:3UTR               |
| chr12 | 116482142 | 116483522 | X:10 | 5  | + | MED13L:intron           |
| chr12 | 124767826 | 124768330 | X:12 | 5  | + | ZNF664-FAM101A:intron   |
| chr13 | 30077279  | 30077552  | X:22 | 8  | + | MTUS2:CDS:14            |
| chr13 | 33896239  | 33896912  | X:13 | 7  | + | STARD13:intron          |
| chr13 | 36642214  | 36644493  | X:14 | 5  | + | DCLK1:intron            |
| chr13 | 92050752  | 92050960  | X:30 | 6  | + | GPC5:promoter           |
| chr13 | 92050752  | 92050960  | X:30 | 6  | + | GPC5:promoter,GPC5:5UTR |
| chr13 | 101187793 | 101188225 | X:12 | 6  | + | A2LD1:intron            |
| chr13 | 111058009 | 111058695 | X:12 | 5  | + | COL4A2:intron           |
| chr13 | 114076067 | 114076719 | X:19 | 5  | + | ADPRHL1:3UTR            |

|       |           |           |      |   |   |                                                     |
|-------|-----------|-----------|------|---|---|-----------------------------------------------------|
| chr14 | 24109492  | 24110335  | X:10 | 6 | + | DHRS2:intron                                        |
| chr14 | 56683528  | 56684516  | X:11 | 6 | + | PELI2:intron                                        |
| chr14 | 62214248  | 62217116  | X:11 | 5 | + | HIF1A:3UTR                                          |
| chr14 | 72467523  | 72468515  | X:13 | 8 | + | RGS6:intron                                         |
| chr14 | 98405047  | 98408445  | X:23 | 5 | + | C14orf64:intron                                     |
| chr15 | 23892844  | 23893075  | X:10 | 6 | + | MAGEL2:promoter                                     |
| chr15 | 23892844  | 23893075  | X:10 | 6 | + | MAGEL2:promoter,MAGEL2:5UTR                         |
| chr15 | 57510119  | 57511991  | X:14 | 5 | + | TCF12:promoter                                      |
| chr15 | 57510119  | 57511991  | X:14 | 5 | + | TCF12:promoter,TCF12:5UTR                           |
| chr15 | 58357369  | 58357534  | X:15 | 7 | + | ALDH1A2:intron                                      |
| chr15 | 69222761  | 69222903  | X:16 | 7 | + | SPESP1:promoter,NOX5:promoter                       |
| chr15 | 69222761  | 69222903  | X:16 | 7 | + | SPESP1:promoter,NOX5:promoter,SPESP1:5UTR,NOX5:5UTR |
| chr15 | 71999914  | 72001373  | X:17 | 5 | + | THSD4:intron                                        |
| chr15 | 84505535  | 84506987  | X:13 | 7 | + | ADAMTSL3:CDS:6                                      |
| chr15 | 89935336  | 89938133  | X:16 | 5 | + | LOC254559:intron                                    |
| chr15 | 92692240  | 92692896  | X:12 | 5 | + | SLCO3A1:intron                                      |
| chr15 | 100674236 | 100675270 | X:14 | 6 | + | ADAMTS17:intron                                     |
| chr15 | 101729470 | 101729708 | X:10 | 7 | + | CHSY1:intron                                        |
| chr16 | 4290662   | 4290972   | X:11 | 5 | + | SRL:intron                                          |
| chr16 | 9914611   | 9916143   | X:13 | 6 | + | GRIN2A:CDS:9                                        |
| chr16 | 11654526  | 11655300  | X:21 | 6 | + | LITAF:intron                                        |
| chr16 | 50589796  | 50590368  | X:18 | 8 | + | NKD1:intron                                         |
| chr16 | 78427350  | 78428596  | X:11 | 6 | + | WWOX:intron                                         |
| chr16 | 84336085  | 84336417  | X:13 | 6 | + | WFDC1:intron                                        |

|       |          |          |      |    |   |                         |
|-------|----------|----------|------|----|---|-------------------------|
| chr16 | 86547739 | 86548894 | X:16 | 5  | + | FOXF1:3UTR              |
| chr16 | 88747897 | 88748067 | X:13 | 6  | + | SNAI3:CDS:2             |
| chr16 | 89411466 | 89412009 | X:17 | 5  | + | ANKRD11:intron          |
| chr17 | 1084457  | 1084956  | X:14 | 6  | + | ABR:intron              |
| chr17 | 30953875 | 30954650 | X:14 | 5  | + | MYO1D:intron            |
| chr17 | 31810160 | 31811046 | X:13 | 5  | + | ACCN1:intron            |
| chr17 | 39728143 | 39728454 | X:15 | 5  | + | KRT9:promoter           |
| chr17 | 39728143 | 39728454 | X:15 | 5  | + | KRT9:promoter,KRT9:5UTR |
| chr17 | 43323892 | 43324256 | X:10 | 6  | + | FMNL1:CDS:26            |
| chr17 | 46628046 | 46628360 | X:22 | 5  | + | HOXB3:CDS:2             |
| chr17 | 46667304 | 46667949 | X:20 | 7  | + | HOXB-AS3:ncexon:1       |
| chr17 | 58164409 | 58165865 | X:13 | 6  | + | LOC645638:ncexon:1      |
| chr17 | 66596122 | 66596436 | X:24 | 10 | + | FAM20A:5UTR             |
| chr17 | 75318260 | 75318786 | X:17 | 5  | + | SEPT9:intron            |
| chr17 | 78560453 | 78560825 | X:20 | 11 | + | RPTOR:intron            |
| chr17 | 78894313 | 78894844 | X:21 | 9  | + | RPTOR:intron            |
| chr17 | 79011390 | 79011661 | X:12 | 6  | + | BAIAP2:intron           |
| chr17 | 80805852 | 80806603 | X:28 | 7  | + | TBCD:intron             |
| chr18 | 447007   | 449695   | X:21 | 5  | + | COLEC12:intron          |
| chr18 | 46895113 | 46895480 | X:10 | 6  | + | DYM:intron              |
| chr18 | 55810522 | 55811072 | X:15 | 5  | + | NEDD4L:intron           |
| chr18 | 60434363 | 60435662 | X:10 | 8  | + | PHLPP1:intron           |
| chr19 | 843995   | 844436   | X:44 | 5  | + | PRTN3:CDS:3             |
| chr19 | 1881371  | 1881630  | X:26 | 10 | + | FAM108A1:5UTR           |

|       |           |           |      |    |   |                                                                                                                                                          |
|-------|-----------|-----------|------|----|---|----------------------------------------------------------------------------------------------------------------------------------------------------------|
| chr19 | 10973855  | 10974368  | X:18 | 5  | + | C19orf38:CDS:6                                                                                                                                           |
| chr19 | 18959505  | 18960090  | X:10 | 5  | + | UPF1:intron                                                                                                                                              |
| chr19 | 48697905  | 48698056  | X:14 | 5  | + | SNAR-A10:intron,SNAR-A7:intron,SNAR-A3:intron,SNAR-A4:intron,SNAR-A5:intron,SNAR-A14:intron,SNAR-A8:intron,SNAR-A6:intron,SNAR-A11:intron,SNAR-A9:intron |
| chr19 | 50733860  | 50734163  | X:26 | 8  | + | MYH14:CDS:8                                                                                                                                              |
| chr19 | 54040763  | 54040981  | X:16 | 8  | + | ZNF331:promoter                                                                                                                                          |
| chr2  | 2192365   | 2193064   | X:13 | 5  | + | MYT1L:intron                                                                                                                                             |
| chr2  | 25856265  | 25856489  | X:17 | 11 | + | DTNB:intron                                                                                                                                              |
| chr2  | 38292097  | 38293288  | X:12 | 5  | + | FAM82A1:intron                                                                                                                                           |
| chr2  | 45233521  | 45233716  | X:12 | 5  | + | SIX2:CDS:2                                                                                                                                               |
| chr2  | 113993259 | 113993459 | X:17 | 6  | + | PAX8:intron                                                                                                                                              |
| chr2  | 116381431 | 116383945 | X:16 | 5  | + | DPP10:intron                                                                                                                                             |
| chr2  | 145784723 | 145786449 | X:14 | 9  | + | DKFZp686O1327:intron                                                                                                                                     |
| chr2  | 174082071 | 174083611 | X:17 | 5  | + | ZAK:intron,MLK7-AS1:intron                                                                                                                               |
| chr2  | 212505663 | 212509521 | X:17 | 6  | + | ERBB4:intron                                                                                                                                             |
| chr2  | 241974983 | 241975744 | X:53 | 5  | + | SNED1:intron                                                                                                                                             |
| chr20 | 14207308  | 14207631  | X:23 | 6  | + | MACROD2:intron                                                                                                                                           |
| chr20 | 25465678  | 25467377  | X:18 | 5  | + | NINL:intron                                                                                                                                              |
| chr20 | 33762456  | 33762765  | X:21 | 7  | + | PROCR:CDS:2                                                                                                                                              |
| chr20 | 43378872  | 43379123  | X:26 | 18 | + | KCNK15:CDS:2                                                                                                                                             |
| chr20 | 45565477  | 45565887  | X:10 | 8  | + | EYA2:intron                                                                                                                                              |
| chr20 | 50148956  | 50149553  | X:20 | 6  | + | NFATC2:intron                                                                                                                                            |
| chr20 | 59945924  | 59946145  | X:14 | 6  | + | CDH4:intron                                                                                                                                              |
| chr20 | 61869763  | 61870145  | X:14 | 5  | + | BIRC7:CDS:3,BIRC7:CDS:4                                                                                                                                  |

|       |           |           |      |    |   |                             |
|-------|-----------|-----------|------|----|---|-----------------------------|
| chr21 | 38078137  | 38078611  | X:13 | 5  | + | SIM2:intron                 |
| chr21 | 39844618  | 39845040  | X:17 | 5  | + | ERG:intron                  |
| chr21 | 42857783  | 42858681  | X:25 | 6  | + | TMPRSS2:intron              |
| chr21 | 43514227  | 43514492  | X:12 | 6  | + | UMODL1:intron               |
| chr21 | 45842491  | 45843110  | X:19 | 5  | + | TRPM2:intron                |
| chr21 | 47581358  | 47581585  | X:26 | 8  | + | C21orf56:CDS:3              |
| chr22 | 43564539  | 43564895  | X:12 | 5  | + | TLL12:CDS:13                |
| chr22 | 43877620  | 43878421  | X:24 | 7  | + | MPPED1:intron               |
| chr22 | 46786519  | 46786864  | X:17 | 5  | + | CELSR1:intron               |
| chr3  | 238552    | 238828    | X:34 | 11 | + | CHL1:5UTR                   |
| chr3  | 23642450  | 23642986  | X:10 | 5  | + | MIR548AC:intron             |
| chr3  | 32861156  | 32861711  | X:33 | 7  | + | TRIM71:intron               |
| chr3  | 44622494  | 44622663  | X:26 | 8  | + | ZNF167:intron               |
| chr3  | 49237239  | 49237433  | X:10 | 5  | + | CCDC36:intron               |
| chr3  | 55516960  | 55517055  | X:11 | 7  | + | WNT5A:intron                |
| chr3  | 66443810  | 66444357  | X:13 | 6  | + | LRIG1:intron                |
| chr3  | 98241431  | 98241597  | X:15 | 8  | + | CLDND1:promoter             |
| chr3  | 98241431  | 98241597  | X:15 | 8  | + | CLDND1:promoter,CLDND1:5UTR |
| chr3  | 114598092 | 114599107 | X:12 | 5  | + | ZBTB20:intron               |
| chr3  | 125094085 | 125094231 | X:10 | 10 | + | ZNF148:promoter             |
| chr3  | 125094085 | 125094231 | X:10 | 10 | + | ZNF148:promoter,ZNF148:5UTR |
| chr3  | 145878837 | 145879049 | X:32 | 5  | + | PLOD2:5UTR                  |
| chr3  | 173220028 | 173221738 | X:11 | 5  | + | NLGN1:intron                |
| chr3  | 175388547 | 175390585 | X:14 | 6  | + | NAALADL2:intron             |

|      |           |           |      |    |   |                         |
|------|-----------|-----------|------|----|---|-------------------------|
| chr4 | 1994391   | 1994619   | X:12 | 5  | + | WHSC2:intron            |
| chr4 | 2392109   | 2392954   | X:19 | 5  | + | ZFYVE28:intron          |
| chr4 | 3372206   | 3372354   | X:12 | 7  | + | RGS12:intron            |
| chr4 | 6458064   | 6458558   | X:14 | 5  | + | PPP2R2C:intron          |
| chr4 | 38086668  | 38087531  | X:15 | 5  | + | TBC1D1:intron           |
| chr4 | 56225056  | 56225878  | X:13 | 6  | + | SRD5A3:CDS:2            |
| chr4 | 87994516  | 87995136  | X:11 | 5  | + | AFF1:intron             |
| chr4 | 186508683 | 186509070 | X:20 | 5  | + | SORBS2:CDS:20           |
| chr5 | 37839737  | 37840021  | X:37 | 5  | + | GDNF:promoter           |
| chr5 | 37839737  | 37840021  | X:37 | 5  | + | GDNF:promoter,GDNF:5UTR |
| chr5 | 92907850  | 92908151  | X:26 | 6  | + | FLJ42709:intron         |
| chr5 | 122434599 | 122434739 | X:13 | 6  | + | PRDM6:intron            |
| chr5 | 158267292 | 158267780 | X:10 | 6  | + | EBF1:intron             |
| chr5 | 177901014 | 177902439 | X:16 | 5  | + | COL23A1:intron          |
| chr6 | 2102705   | 2103795   | X:12 | 5  | + | GMDS:intron             |
| chr6 | 6003447   | 6003687   | X:16 | 6  | + | NRN1:intron             |
| chr6 | 10612782  | 10614118  | X:14 | 5  | + | GCNT2:intron            |
| chr6 | 35344623  | 35345149  | X:13 | 6  | + | PPARD:intron            |
| chr6 | 41312104  | 41312735  | X:16 | 5  | + | NCR2:intron             |
| chr6 | 54056383  | 54058669  | X:13 | 6  | + | MLIP:intron             |
| chr6 | 64722688  | 64723267  | X:12 | 7  | + | EYS:intron              |
| chr6 | 100897183 | 100897472 | X:23 | 9  | + | SIM1:CDS:5,SIM1:CDS:4   |
| chr6 | 107366963 | 107367927 | X:13 | 5  | + | C6orf203:intron         |
| chr6 | 144329192 | 144329386 | X:31 | 21 | + | PLAGL1:5UTR             |

|      |           |           |      |    |   |                                     |
|------|-----------|-----------|------|----|---|-------------------------------------|
| chr6 | 149772191 | 149772625 | X:48 | 8  | + | ZC3H12D:CDS:5                       |
| chr6 | 152450797 | 152451266 | X:11 | 5  | + | SYNE1:intron                        |
| chr7 | 2749437   | 2749703   | X:20 | 9  | + | AMZ1:CDS:5                          |
| chr7 | 4910684   | 4911085   | X:15 | 6  | + | RADIL:intron                        |
| chr7 | 87187773  | 87190961  | X:12 | 5  | + | ABCB1:CDS:7                         |
| chr7 | 95546235  | 95546756  | X:13 | 9  | + | DYNC111:intron                      |
| chr7 | 97847264  | 97847722  | X:23 | 6  | + | TECPR1:CDS:22                       |
| chr7 | 101928663 | 101929277 | X:17 | 5  | + | SH2B2:intron                        |
| chr7 | 102554356 | 102554806 | X:11 | 6  | + | LRRC17:intron,FBXL13:intron         |
| chr7 | 149462445 | 149462594 | X:16 | 10 | + | ZNF467:CDS:4                        |
| chr7 | 150498695 | 150498934 | X:13 | 6  | + | TMEM176B:promoter,TMEM176A:promoter |
| chr7 | 153868008 | 153870442 | X:20 | 5  | + | DPP6:intron                         |
| chr7 | 154862858 | 154863007 | X:16 | 5  | + | HTR5A:CDS:1                         |
| chr8 | 3276401   | 3277741   | X:14 | 5  | + | CSMD1:intron                        |
| chr8 | 11570972  | 11571439  | X:10 | 6  | + | GATA4:intron                        |
| chr8 | 18597602  | 18598096  | X:10 | 7  | + | PSD3:intron                         |
| chr8 | 22021201  | 22021677  | X:20 | 10 | + | BMP1:promoter                       |
| chr8 | 41593948  | 41594161  | X:11 | 6  | + | ANK1:intron                         |
| chr8 | 72270545  | 72272749  | X:11 | 5  | + | EYA1:intron                         |
| chr8 | 99007456  | 99009173  | X:24 | 6  | + | MATN2:intron                        |
| chr8 | 110424077 | 110425265 | X:12 | 5  | + | PKHD1L1:CDS:20                      |
| chr8 | 144810244 | 144810564 | X:48 | 13 | + | FAM83H:CDS:4                        |
| chr9 | 9182169   | 9183854   | X:14 | 5  | + | PTPRD:promoter                      |
| chr9 | 9182169   | 9183854   | X:14 | 5  | + | PTPRD:promoter,PTPRD:5UTR           |



|      |           |           |      |    |   |                                                                                  |
|------|-----------|-----------|------|----|---|----------------------------------------------------------------------------------|
| chr9 | 13941463  | 13942084  | X:10 | 5  | + | C9orf146:intron                                                                  |
| chr9 | 45727308  | 45727640  | X:14 | 5  | + | FAM27A:ncexon:1                                                                  |
| chr9 | 45729607  | 45729811  | X:14 | 5  | + | LOC643648:intron,FAM75A7:intron,FAM75A5:intron,LOC286297:intron,ANKRD20A3:intron |
| chr9 | 66489407  | 66489685  | X:17 | 9  | + | LOC286297:intron,ANKRD20A3:intron                                                |
| chr9 | 69193705  | 69196566  | X:25 | 8  | + | LOC100133920:intron                                                              |
| chr9 | 71618718  | 71620233  | X:13 | 7  | + | PIP5K1B:intron                                                                   |
| chr9 | 124088439 | 124088949 | X:16 | 6  | + | GSN:CDS:11                                                                       |
| chr9 | 126135610 | 126135842 | X:23 | 8  | + | CRB2:CDS:10                                                                      |
| chr9 | 135361992 | 135362164 | X:13 | 5  | + | C9orf171:intron                                                                  |
| chr9 | 136576801 | 136577354 | X:25 | 6  | + | SARDH:intron                                                                     |
| chrX | 9879646   | 9881135   | X:33 | 11 | + | SHROOM2:intron                                                                   |
| chrX | 48957894  | 48958259  | X:32 | 6  | + | WDR45:promoter                                                                   |
| chrX | 48957894  | 48958259  | X:32 | 6  | + | WDR45:promoter,WDR45:5UTR                                                        |
| chrX | 144903843 | 144904183 | X:12 | 6  | + | SLITRK2:promoter                                                                 |
| chrX | 144903843 | 144904183 | X:12 | 6  | + | SLITRK2:promoter,SLITRK2:5UTR                                                    |

---

Supplementary Table 2: The genes with DMRs which located in the gene promoter by DiffMeth method analysis

---

**gene symbol**

---

ACTB  
ALDH5A1  
ASS1  
AZI2  
B3GALNT2  
BDNF  
BMF  
BMP1  
C15orf62  
C18orf8  
C5orf42  
C7orf10  
C7orf11  
CACNB3  
CLDND1  
CMPK1  
CMTM2  
CNKSR2  
COL1A2  
CPSF4  
DAPK1

DEGS1  
DENND1A  
DKK1  
DOK1  
DYNC1H1  
FAM64A  
FAR1  
FBXW11  
FGF8  
GCC1  
GDNF  
GNAI2  
GPC5  
GRM4  
HMX2  
INPP5F  
ISYNA1  
KCNE4  
KIAA1377  
KLK7  
KRT9  
LGALS8  
LHFPL2  
LOXL3

LTB4R  
LYSMD4  
MAGEL2  
MDK  
MEGF9  
MEST  
MRPL12  
MRPS5  
NHLRC1  
NHP2L1  
NLRP3  
NOC4L  
NOX5  
OBFC2A  
PAX1  
PDHA1  
PEX10  
PTCD1  
PTPRD  
PTPRS  
RABEP2  
RABGAP1L  
RBM11  
REEP5

RUNDC3B  
RUNX3  
SIGMAR1  
SKP1  
SLAIN1  
SLITRK2  
SNAP47  
SNRPD2  
SNRPE  
SNRPN  
SNURF  
SORD  
SP5  
SPESP1  
SRPRB  
SYAP1  
SYNJ2  
TAGAP  
TCF12  
TIMM8A  
TMEM176A  
TMEM176B  
TMEM37  
TP73

TRIM7

TSC2

VRK1

WDR45

WNT2B

ZIC4

ZNF148

ZNF18

ZNF184

ZNF286B

ZNF331

ZNF544

ZSCAN1

---

**Supplementary Table 3: The gene related hyper-methylated DMRs in the OST-7D group compared to OST-0D group**

---

| Chr   | Start     | End       | CpG sites | Num-sites | the value of Meth-diff | Gene associated regions                           |
|-------|-----------|-----------|-----------|-----------|------------------------|---------------------------------------------------|
| chr1  | 3154748   | 3155412   | X:30      | 7         | +                      | PRDM16:intron                                     |
| chr1  | 6531040   | 6531196   | X:16      | 5         | +                      | PLEKHG5:CDS:12                                    |
| chr1  | 17092499  | 17092748  | X:10      | 7         | +                      | MIR3675:intron                                    |
| chr1  | 21864787  | 21864977  | X:14      | 5         | +                      | ALPL:intron                                       |
| chr1  | 23720292  | 23720842  | X:16      | 6         | +                      | TCEA3:CDS:8                                       |
| chr1  | 25894682  | 25895381  | X:22      | 5         | +                      | LDLRAP1:3UTR                                      |
| chr1  | 61914545  | 61915001  | X:11      | 6         | +                      | NFIA:intron                                       |
| chr1  | 92216106  | 92217483  | X:11      | 6         | +                      | TGFBR3:intron                                     |
| chr1  | 160054294 | 160054373 | X:13      | 5         | +                      | KCNJ9:CDS:1                                       |
| chr1  | 174843541 | 174844010 | X:10      | 6         | +                      | RABGAP1L:promoter,RABGAP1L:promoter               |
| chr1  | 174843541 | 174844010 | X:10      | 6         | +                      | RABGAP1L:promoter,RABGAP1L:promoter,RABGAP1L:5UTR |
| chr1  | 198901566 | 198903300 | X:12      | 5         | +                      | LOC100131234:intron                               |
| chr1  | 204653481 | 204653718 | X:11      | 5         | +                      | LRRN2:intron                                      |
| chr1  | 245462133 | 245462493 | X:13      | 7         | +                      | KIF26B:intron                                     |
| chr10 | 21144399  | 21145514  | X:10      | 5         | +                      | NEBL:intron                                       |
| chr10 | 24416323  | 24417665  | X:13      | 5         | +                      | KIAA1217:intron                                   |
| chr10 | 30316299  | 30316709  | X:16      | 9         | +                      | KIAA1462:CDS:2                                    |
| chr10 | 85955263  | 85956268  | X:23      | 7         | +                      | CDHR1:CDS:2,CDHR1:CDS:3                           |
| chr10 | 114712357 | 114712663 | X:19      | 6         | +                      | TCF7L2:intron                                     |
| chr10 | 124907550 | 124907762 | X:26      | 7         | +                      | HMX2:promoter                                     |

---

|       |           |           |      |    |   |                         |
|-------|-----------|-----------|------|----|---|-------------------------|
| chr10 | 124907550 | 124907762 | X:26 | 7  | + | HMX2:promoter,HMX2:5UTR |
| chr10 | 131749397 | 131749973 | X:20 | 6  | + | EBF3:intron             |
| chr11 | 17786117  | 17786797  | X:21 | 6  | + | KCNC1:intron            |
| chr11 | 44325258  | 44325886  | X:33 | 12 | + | ALX4:intron             |
| chr11 | 46384634  | 46385376  | X:25 | 8  | + | DGKZ:intron             |
| chr11 | 46401392  | 46401701  | X:17 | 5  | + | MDK:promoter            |
| chr11 | 61481086  | 61481638  | X:14 | 5  | + | DAGLA:intron            |
| chr11 | 66062246  | 66062366  | X:20 | 6  | + | TMEM151A:CDS:2          |
| chr11 | 68147850  | 68148079  | X:17 | 6  | + | LRP5:intron             |
| chr11 | 101783582 | 101785113 | X:10 | 5  | + | KIAA1377:promoter       |
| chr11 | 122597619 | 122598238 | X:14 | 6  | + | UBASH3B:intron          |
| chr12 | 2339324   | 2339614   | X:30 | 9  | + | CACNA1C:intron          |
| chr12 | 49943271  | 49943434  | X:17 | 5  | + | KCNH3:CDS:9             |
| chr12 | 94659159  | 94659830  | X:11 | 5  | + | PLXNC1:intron           |
| chr12 | 115107577 | 115109504 | X:28 | 7  | + | TBX3:3UTR               |
| chr12 | 116482142 | 116483522 | X:10 | 5  | + | MED13L:intron           |
| chr12 | 124767826 | 124768330 | X:12 | 5  | + | ZNF664-FAM101A:intron   |
| chr13 | 30077279  | 30077552  | X:22 | 8  | + | MTUS2:CDS:14            |
| chr13 | 33896239  | 33896912  | X:13 | 7  | + | STARD13:intron          |
| chr13 | 36642214  | 36644493  | X:14 | 5  | + | DCLK1:intron            |
| chr13 | 92050752  | 92050960  | X:30 | 6  | + | GPC5:promoter           |
| chr13 | 92050752  | 92050960  | X:30 | 6  | + | GPC5:promoter,GPC5:5UTR |
| chr13 | 101187793 | 101188225 | X:12 | 6  | + | A2LD1:intron            |
| chr13 | 111058009 | 111058695 | X:12 | 5  | + | COL4A2:intron           |



|       |           |           |      |   |   |                                                     |
|-------|-----------|-----------|------|---|---|-----------------------------------------------------|
| chr13 | 114076067 | 114076719 | X:19 | 5 | + | ADPRHL1:3UTR                                        |
| chr14 | 24109492  | 24110335  | X:10 | 6 | + | DHRS2:intron                                        |
| chr14 | 56683528  | 56684516  | X:11 | 6 | + | PELI2:intron                                        |
| chr14 | 62214248  | 62217116  | X:11 | 5 | + | HIF1A:3UTR                                          |
| chr14 | 72467523  | 72468515  | X:13 | 8 | + | RGS6:intron                                         |
| chr14 | 98405047  | 98408445  | X:23 | 5 | + | C14orf64:intron                                     |
| chr15 | 23892844  | 23893075  | X:10 | 6 | + | MAGEL2:promoter                                     |
| chr15 | 23892844  | 23893075  | X:10 | 6 | + | MAGEL2:promoter,MAGEL2:5UTR                         |
| chr15 | 57510119  | 57511991  | X:14 | 5 | + | TCF12:promoter                                      |
| chr15 | 57510119  | 57511991  | X:14 | 5 | + | TCF12:promoter,TCF12:5UTR                           |
| chr15 | 58357369  | 58357534  | X:15 | 7 | + | ALDH1A2:intron                                      |
| chr15 | 69222761  | 69222903  | X:16 | 7 | + | SPESP1:promoter,NOX5:promoter                       |
| chr15 | 69222761  | 69222903  | X:16 | 7 | + | SPESP1:promoter,NOX5:promoter,SPESP1:5UTR,NOX5:5UTR |
| chr15 | 71999914  | 72001373  | X:17 | 5 | + | THSD4:intron                                        |
| chr15 | 84505535  | 84506987  | X:13 | 7 | + | ADAMTSL3:CDS:6                                      |
| chr15 | 89935336  | 89938133  | X:16 | 5 | + | LOC254559:intron                                    |
| chr15 | 92692240  | 92692896  | X:12 | 5 | + | SLCO3A1:intron                                      |
| chr15 | 100674236 | 100675270 | X:14 | 6 | + | ADAMTS17:intron                                     |
| chr15 | 101729470 | 101729708 | X:10 | 7 | + | CHSY1:intron                                        |
| chr16 | 4290662   | 4290972   | X:11 | 5 | + | SRL:intron                                          |
| chr16 | 9914611   | 9916143   | X:13 | 6 | + | GRIN2A:CDS:9                                        |
| chr16 | 11654526  | 11655300  | X:21 | 6 | + | LITAF:intron                                        |
| chr16 | 50589796  | 50590368  | X:18 | 8 | + | NKD1:intron                                         |
| chr16 | 78427350  | 78428596  | X:11 | 6 | + | WWOX:intron                                         |

|       |          |          |      |    |   |                         |
|-------|----------|----------|------|----|---|-------------------------|
| chr16 | 84336085 | 84336417 | X:13 | 6  | + | WFDC1:intron            |
| chr16 | 86547739 | 86548894 | X:16 | 5  | + | FOXF1:3UTR              |
| chr16 | 88747897 | 88748067 | X:13 | 6  | + | SNAI3:CDS:2             |
| chr16 | 89411466 | 89412009 | X:17 | 5  | + | ANKRD11:intron          |
| chr17 | 1084457  | 1084956  | X:14 | 6  | + | ABR:intron              |
| chr17 | 30953875 | 30954650 | X:14 | 5  | + | MYO1D:intron            |
| chr17 | 31810160 | 31811046 | X:13 | 5  | + | ACCN1:intron            |
| chr17 | 39728143 | 39728454 | X:15 | 5  | + | KRT9:promoter           |
| chr17 | 39728143 | 39728454 | X:15 | 5  | + | KRT9:promoter,KRT9:5UTR |
| chr17 | 43323892 | 43324256 | X:10 | 6  | + | FMNL1:CDS:26            |
| chr17 | 46628046 | 46628360 | X:22 | 5  | + | HOXB3:CDS:2             |
| chr17 | 46667304 | 46667949 | X:20 | 7  | + | HOXB-AS3:ncexon:1       |
| chr17 | 58164409 | 58165865 | X:13 | 6  | + | LOC645638:ncexon:1      |
| chr17 | 66596122 | 66596436 | X:24 | 10 | + | FAM20A:5UTR             |
| chr17 | 75318260 | 75318786 | X:17 | 5  | + | SEPT9:intron            |
| chr17 | 78560453 | 78560825 | X:20 | 11 | + | RPTOR:intron            |
| chr17 | 78894313 | 78894844 | X:21 | 9  | + | RPTOR:intron            |
| chr17 | 79011390 | 79011661 | X:12 | 6  | + | BAIAP2:intron           |
| chr17 | 80805852 | 80806603 | X:28 | 7  | + | TBCD:intron             |
| chr18 | 447007   | 449695   | X:21 | 5  | + | COLEC12:intron          |
| chr18 | 46895113 | 46895480 | X:10 | 6  | + | DYM:intron              |
| chr18 | 55810522 | 55811072 | X:15 | 5  | + | NEDD4L:intron           |
| chr18 | 60434363 | 60435662 | X:10 | 8  | + | PHLPP1:intron           |
| chr19 | 843995   | 844436   | X:44 | 5  | + | PRTN3:CDS:3             |

|       |           |           |      |    |   |                                                                                                                                                              |
|-------|-----------|-----------|------|----|---|--------------------------------------------------------------------------------------------------------------------------------------------------------------|
| chr19 | 1881371   | 1881630   | X:26 | 10 | + | FAM108A1:5UTR                                                                                                                                                |
| chr19 | 10973855  | 10974368  | X:18 | 5  | + | C19orf38:CDS:6                                                                                                                                               |
| chr19 | 18959505  | 18960090  | X:10 | 5  | + | UPF1:intron                                                                                                                                                  |
| chr19 | 48697905  | 48698056  | X:14 | 5  | + | SNAR-A10:intron,SNAR-A7:intron,SNAR-A3:intron,SNAR-A4:intron,SNAR-A5:intron,SNAR-A14:i<br>ntron,SNAR-A8:intron,SNAR-A6:intron,SNAR-A11:intron,SNAR-A9:intron |
| chr19 | 50733860  | 50734163  | X:26 | 8  | + | MYH14:CDS:8                                                                                                                                                  |
| chr19 | 54040763  | 54040981  | X:16 | 8  | + | ZNF331:promoter                                                                                                                                              |
| chr2  | 2192365   | 2193064   | X:13 | 5  | + | MYT1L:intron                                                                                                                                                 |
| chr2  | 25856265  | 25856489  | X:17 | 11 | + | DTNB:intron                                                                                                                                                  |
| chr2  | 38292097  | 38293288  | X:12 | 5  | + | FAM82A1:intron                                                                                                                                               |
| chr2  | 45233521  | 45233716  | X:12 | 5  | + | SIX2:CDS:2                                                                                                                                                   |
| chr2  | 113993259 | 113993459 | X:17 | 6  | + | PAX8:intron                                                                                                                                                  |
| chr2  | 116381431 | 116383945 | X:16 | 5  | + | DPP10:intron                                                                                                                                                 |
| chr2  | 145784723 | 145786449 | X:14 | 9  | + | DKFZp686O1327:intron                                                                                                                                         |
| chr2  | 174082071 | 174083611 | X:17 | 5  | + | ZAK:intron,MLK7-AS1:intron                                                                                                                                   |
| chr2  | 212505663 | 212509521 | X:17 | 6  | + | ERBB4:intron                                                                                                                                                 |
| chr2  | 241974983 | 241975744 | X:53 | 5  | + | SNED1:intron                                                                                                                                                 |
| chr20 | 14207308  | 14207631  | X:23 | 6  | + | MACROD2:intron                                                                                                                                               |
| chr20 | 25465678  | 25467377  | X:18 | 5  | + | NINL:intron                                                                                                                                                  |
| chr20 | 33762456  | 33762765  | X:21 | 7  | + | PROCR:CDS:2                                                                                                                                                  |
| chr20 | 43378872  | 43379123  | X:26 | 18 | + | KCNK15:CDS:2                                                                                                                                                 |
| chr20 | 45565477  | 45565887  | X:10 | 8  | + | EYA2:intron                                                                                                                                                  |
| chr20 | 50148956  | 50149553  | X:20 | 6  | + | NFATC2:intron                                                                                                                                                |
| chr20 | 59945924  | 59946145  | X:14 | 6  | + | CDH4:intron                                                                                                                                                  |

|       |           |           |      |    |   |                             |
|-------|-----------|-----------|------|----|---|-----------------------------|
| chr20 | 61869763  | 61870145  | X:14 | 5  | + | BIRC7:CDS:3,BIRC7:CDS:4     |
| chr21 | 38078137  | 38078611  | X:13 | 5  | + | SIM2:intron                 |
| chr21 | 39844618  | 39845040  | X:17 | 5  | + | ERG:intron                  |
| chr21 | 42857783  | 42858681  | X:25 | 6  | + | TMPRSS2:intron              |
| chr21 | 43514227  | 43514492  | X:12 | 6  | + | UMODL1:intron               |
| chr21 | 45842491  | 45843110  | X:19 | 5  | + | TRPM2:intron                |
| chr21 | 47581358  | 47581585  | X:26 | 8  | + | C21orf56:CDS:3              |
| chr22 | 43564539  | 43564895  | X:12 | 5  | + | TTLL12:CDS:13               |
| chr22 | 43877620  | 43878421  | X:24 | 7  | + | MPPED1:intron               |
| chr22 | 46786519  | 46786864  | X:17 | 5  | + | CELSR1:intron               |
| chr3  | 238552    | 238828    | X:34 | 11 | + | CHL1:5UTR                   |
| chr3  | 23642450  | 23642986  | X:10 | 5  | + | MIR548AC:intron             |
| chr3  | 32861156  | 32861711  | X:33 | 7  | + | TRIM71:intron               |
| chr3  | 44622494  | 44622663  | X:26 | 8  | + | ZNF167:intron               |
| chr3  | 49237239  | 49237433  | X:10 | 5  | + | CCDC36:intron               |
| chr3  | 55516960  | 55517055  | X:11 | 7  | + | WNT5A:intron                |
| chr3  | 66443810  | 66444357  | X:13 | 6  | + | LRIG1:intron                |
| chr3  | 98241431  | 98241597  | X:15 | 8  | + | CLDND1:promoter             |
| chr3  | 98241431  | 98241597  | X:15 | 8  | + | CLDND1:promoter,CLDND1:5UTR |
| chr3  | 114598092 | 114599107 | X:12 | 5  | + | ZBTB20:intron               |
| chr3  | 125094085 | 125094231 | X:10 | 10 | + | ZNF148:promoter             |
| chr3  | 125094085 | 125094231 | X:10 | 10 | + | ZNF148:promoter,ZNF148:5UTR |
| chr3  | 145878837 | 145879049 | X:32 | 5  | + | PLOD2:5UTR                  |
| chr3  | 173220028 | 173221738 | X:11 | 5  | + | NLGN1:intron                |

|      |           |           |      |   |   |                         |
|------|-----------|-----------|------|---|---|-------------------------|
| chr3 | 175388547 | 175390585 | X:14 | 6 | + | NAALADL2:intron         |
| chr4 | 1994391   | 1994619   | X:12 | 5 | + | WHSC2:intron            |
| chr4 | 2392109   | 2392954   | X:19 | 5 | + | ZFYVE28:intron          |
| chr4 | 3372206   | 3372354   | X:12 | 7 | + | RGS12:intron            |
| chr4 | 6458064   | 6458558   | X:14 | 5 | + | PPP2R2C:intron          |
| chr4 | 38086668  | 38087531  | X:15 | 5 | + | TBC1D1:intron           |
| chr4 | 56225056  | 56225878  | X:13 | 6 | + | SRD5A3:CDS:2            |
| chr4 | 87994516  | 87995136  | X:11 | 5 | + | AFF1:intron             |
| chr4 | 186508683 | 186509070 | X:20 | 5 | + | SORBS2:CDS:20           |
| chr5 | 37839737  | 37840021  | X:37 | 5 | + | GDNF:promoter           |
| chr5 | 37839737  | 37840021  | X:37 | 5 | + | GDNF:promoter,GDNF:5UTR |
| chr5 | 92907850  | 92908151  | X:26 | 6 | + | FLJ42709:intron         |
| chr5 | 122434599 | 122434739 | X:13 | 6 | + | PRDM6:intron            |
| chr5 | 158267292 | 158267780 | X:10 | 6 | + | EBF1:intron             |
| chr5 | 177901014 | 177902439 | X:16 | 5 | + | COL23A1:intron          |
| chr6 | 2102705   | 2103795   | X:12 | 5 | + | GMDS:intron             |
| chr6 | 6003447   | 6003687   | X:16 | 6 | + | NRN1:intron             |
| chr6 | 10612782  | 10614118  | X:14 | 5 | + | GCNT2:intron            |
| chr6 | 35344623  | 35345149  | X:13 | 6 | + | PPARD:intron            |
| chr6 | 41312104  | 41312735  | X:16 | 5 | + | NCR2:intron             |
| chr6 | 54056383  | 54058669  | X:13 | 6 | + | MLIP:intron             |
| chr6 | 64722688  | 64723267  | X:12 | 7 | + | EYS:intron              |
| chr6 | 100897183 | 100897472 | X:23 | 9 | + | SIM1:CDS:5,SIM1:CDS:4   |
| chr6 | 107366963 | 107367927 | X:13 | 5 | + | C6orf203:intron         |

|      |           |           |      |    |   |                                     |
|------|-----------|-----------|------|----|---|-------------------------------------|
| chr6 | 144329192 | 144329386 | X:31 | 21 | + | PLAGL1:5UTR                         |
| chr6 | 149772191 | 149772625 | X:48 | 8  | + | ZC3H12D:CDS:5                       |
| chr6 | 152450797 | 152451266 | X:11 | 5  | + | SYNE1:intron                        |
| chr7 | 2749437   | 2749703   | X:20 | 9  | + | AMZ1:CDS:5                          |
| chr7 | 4910684   | 4911085   | X:15 | 6  | + | RADIL:intron                        |
| chr7 | 87187773  | 87190961  | X:12 | 5  | + | ABCB1:CDS:7                         |
| chr7 | 95546235  | 95546756  | X:13 | 9  | + | DYNC111:intron                      |
| chr7 | 97847264  | 97847722  | X:23 | 6  | + | TECPR1:CDS:22                       |
| chr7 | 101928663 | 101929277 | X:17 | 5  | + | SH2B2:intron                        |
| chr7 | 102554356 | 102554806 | X:11 | 6  | + | LRRC17:intron,FBXL13:intron         |
| chr7 | 149462445 | 149462594 | X:16 | 10 | + | ZNF467:CDS:4                        |
| chr7 | 150498695 | 150498934 | X:13 | 6  | + | TMEM176B:promoter,TMEM176A:promoter |
| chr7 | 153868008 | 153870442 | X:20 | 5  | + | DPP6:intron                         |
| chr7 | 154862858 | 154863007 | X:16 | 5  | + | HTR5A:CDS:1                         |
| chr8 | 3276401   | 3277741   | X:14 | 5  | + | CSMD1:intron                        |
| chr8 | 11570972  | 11571439  | X:10 | 6  | + | GATA4:intron                        |
| chr8 | 18597602  | 18598096  | X:10 | 7  | + | PSD3:intron                         |
| chr8 | 22021201  | 22021677  | X:20 | 10 | + | BMP1:promoter                       |
| chr8 | 41593948  | 41594161  | X:11 | 6  | + | ANK1:intron                         |
| chr8 | 72270545  | 72272749  | X:11 | 5  | + | EYA1:intron                         |
| chr8 | 99007456  | 99009173  | X:24 | 6  | + | MATN2:intron                        |
| chr8 | 110424077 | 110425265 | X:12 | 5  | + | PKHD1L1:CDS:20                      |
| chr8 | 144810244 | 144810564 | X:48 | 13 | + | FAM83H:CDS:4                        |
| chr9 | 9182169   | 9183854   | X:14 | 5  | + | PTPRD:promoter                      |

|      |           |           |      |    |   |                                                                                  |
|------|-----------|-----------|------|----|---|----------------------------------------------------------------------------------|
| chr9 | 9182169   | 9183854   | X:14 | 5  | + | PTPRD:promoter,PTPRD:5UTR                                                        |
| chr9 | 13941463  | 13942084  | X:10 | 5  | + | C9orf146:intron                                                                  |
| chr9 | 45727308  | 45727640  | X:14 | 5  | + | FAM27A:ncexon:1                                                                  |
| chr9 | 45729607  | 45729811  | X:14 | 5  | + | LOC643648:intron,FAM75A7:intron,FAM75A5:intron,LOC286297:intron,ANKRD20A3:intron |
| chr9 | 66489407  | 66489685  | X:17 | 9  | + | LOC286297:intron,ANKRD20A3:intron                                                |
| chr9 | 69193705  | 69196566  | X:25 | 8  | + | LOC100133920:intron                                                              |
| chr9 | 71618718  | 71620233  | X:13 | 7  | + | PIP5K1B:intron                                                                   |
| chr9 | 124088439 | 124088949 | X:16 | 6  | + | GSN:CDS:11                                                                       |
| chr9 | 126135610 | 126135842 | X:23 | 8  | + | CRB2:CDS:10                                                                      |
| chr9 | 135361992 | 135362164 | X:13 | 5  | + | C9orf171:intron                                                                  |
| chr9 | 136576801 | 136577354 | X:25 | 6  | + | SARDH:intron                                                                     |
| chrX | 9879646   | 9881135   | X:33 | 11 | + | SHROOM2:intron                                                                   |
| chrX | 48957894  | 48958259  | X:32 | 6  | + | WDR45:promoter                                                                   |
| chrX | 48957894  | 48958259  | X:32 | 6  | + | WDR45:promoter,WDR45:5UTR                                                        |
| chrX | 144903843 | 144904183 | X:12 | 6  | + | SLITRK2:promoter                                                                 |
| chrX | 144903843 | 144904183 | X:12 | 6  | + | SLITRK2:promoter,SLITRK2:5UTR                                                    |

---

Supplementary Table 4: The genes with hyper-methylated DMRs in the OST-7D group which located in the gene promoter

---

| <u>gene symbol</u> |
|--------------------|
| BMP1               |
| CLDND1             |
| GDNF               |
| GPC5               |
| HMX2               |
| KIAA1377           |
| KRT9               |
| MAGEL2             |
| MDK                |
| NOX5               |
| PTPRD              |
| RABGAP1L           |
| SLITRK2            |
| SPESP1             |
| TCF12              |
| TMEM176A           |
| TMEM176B           |
| WDR45              |
| ZNF148             |
| ZNF331             |

---



Supplementary Table 5: The gene related hypor-methylated DMRs in the OST-7D group compared to OST-0D group

| Chr  | Start     | End       | CpG sites | Num-sites | the value of Meth-diff | Gene associated regions                                                                                                                           |
|------|-----------|-----------|-----------|-----------|------------------------|---------------------------------------------------------------------------------------------------------------------------------------------------|
| chr1 | 2344140   | 2344889   | X:76      | 9         | +                      | PEX10:promoter                                                                                                                                    |
| chr1 | 2424829   | 2425255   | X:22      | 8         | +                      | PLCH2:intron                                                                                                                                      |
| chr1 | 3061790   | 3062910   | X:50      | 7         | +                      | PRDM16:intron                                                                                                                                     |
| chr1 | 3164511   | 3164930   | X:18      | 12        | +                      | PRDM16:intron                                                                                                                                     |
| chr1 | 3568495   | 3568855   | X:39      | 12        | +                      | TP73:promoter                                                                                                                                     |
| chr1 | 6305277   | 6305464   | X:20      | 9         | +                      | HES3:CDS:3                                                                                                                                        |
| chr1 | 9713439   | 9713749   | X:11      | 5         | +                      | C1orf200:ncexon:2                                                                                                                                 |
| chr1 | 23066258  | 23066696  | X:17      | 10        | +                      | EPHB2:intron                                                                                                                                      |
| chr1 | 25257599  | 25257930  | X:25      | 8         | +                      | RUNX3:promoter                                                                                                                                    |
| chr1 | 26026292  | 26027038  | X:10      | 7         | +                      | MAN1C1:intron                                                                                                                                     |
| chr1 | 32135441  | 32135801  | X:11      | 5         | +                      | COL16A1:intron                                                                                                                                    |
| chr1 | 39871261  | 39873833  | X:26      | 5         | +                      | MACF1:intron                                                                                                                                      |
| chr1 | 47799412  | 47799486  | X:14      | 8         | +                      | CMPK1:promoter                                                                                                                                    |
| chr1 | 47799412  | 47799486  | X:14      | 8         | +                      | CMPK1:promoter, CMPK1:5UTR                                                                                                                        |
| chr1 | 52455818  | 52456010  | X:13      | 5         | +                      | RAB3B:intron                                                                                                                                      |
| chr1 | 89457203  | 89457641  | X:18      | 13        | +                      | RBMXL1:intron, CCBL2:intron                                                                                                                       |
| chr1 | 113051385 | 113051519 | X:21      | 7         | +                      | WNT2B:promoter                                                                                                                                    |
| chr1 | 113051385 | 113051519 | X:21      | 7         | +                      | WNT2B:promoter, WNT2B:5UTR                                                                                                                        |
| chr1 | 119521629 | 119522501 | X:43      | 6         | +                      | TBX15:intron                                                                                                                                      |
| chr1 | 146895262 | 146895660 | X:12      | 5         | +                      | LOC100289211:intron, FLJ39739:intron, LOC728855:intron, PPIAL4B:intron, NBP11:intron, PPIAL4A:intron, GPR89C:intron, NBP24:intron, PDZK1P1:intron |

|       |           |           |      |    |   |                                                    |
|-------|-----------|-----------|------|----|---|----------------------------------------------------|
| chr1  | 149604553 | 149606699 | X:70 | 5  | + | LOC728855:intron, FAM91A2:intron, HIST2H2BF:intron |
| chr1  | 156815427 | 156815904 | X:39 | 10 | + | INSRR:CDS:10, INSRR:CDS:9                          |
| chr1  | 165321402 | 165322172 | X:46 | 11 | + | LMX1A:intron                                       |
| chr1  | 165323191 | 165323732 | X:36 | 13 | + | LMX1A:intron                                       |
| chr1  | 166890456 | 166890693 | X:26 | 7  | + | ILDR2:CDS:9                                        |
| chr1  | 170640024 | 170640754 | X:29 | 5  | + | PRRX1:intron                                       |
| chr1  | 203829693 | 203830300 | X:23 | 10 | + | SNRPE:promoter                                     |
| chr1  | 214476555 | 214477131 | X:15 | 7  | + | SMYD2:intron                                       |
| chr1  | 224370938 | 224371082 | X:16 | 8  | + | DEGS1:promoter                                     |
| chr1  | 224370938 | 224371082 | X:16 | 8  | + | DEGS1:promoter, DEGS1:5UTR                         |
| chr1  | 226411357 | 226411539 | X:27 | 5  | + | MIXL1:CDS:1                                        |
| chr1  | 227922721 | 227922985 | X:32 | 6  | + | SNAP47:promoter                                    |
| chr1  | 227922721 | 227922985 | X:32 | 6  | + | SNAP47:promoter, SNAP47:5UTR                       |
| chr1  | 228401244 | 228401518 | X:33 | 6  | + | OBSCN:CDS:2                                        |
| chr1  | 235667482 | 235667755 | X:36 | 7  | + | B3GALNT2:promoter                                  |
| chr1  | 235667482 | 235667755 | X:36 | 7  | + | B3GALNT2:promoter, B3GALNT2:5UTR                   |
| chr1  | 236686011 | 236686929 | X:23 | 10 | + | LGALS8:promoter                                    |
| chr1  | 236686011 | 236686929 | X:23 | 10 | + | LGALS8:promoter, LGALS8:5UTR                       |
| chr1  | 247579508 | 247580310 | X:17 | 8  | + | NLRP3:promoter                                     |
| chr10 | 6213830   | 6214153   | X:14 | 8  | + | PFKFB3:intron                                      |
| chr10 | 35736721  | 35737318  | X:14 | 6  | + | CCNY:intron                                        |
| chr10 | 49879397  | 49880157  | X:37 | 12 | + | FAM21B:intron                                      |
| chr10 | 54074079  | 54074336  | X:18 | 12 | + | DKK1:promoter                                      |
| chr10 | 54074079  | 54074336  | X:18 | 12 | + | DKK1:promoter, DKK1:5UTR                           |

|       |           |           |      |    |   |                                               |
|-------|-----------|-----------|------|----|---|-----------------------------------------------|
| chr10 | 74094093  | 74094869  | X:26 | 5  | + | DNAJB12:3UTR                                  |
| chr10 | 78011602  | 78012721  | X:15 | 5  | + | C10orf11:intron                               |
| chr10 | 102586628 | 102586778 | X:16 | 9  | + | PAX2:CDS:10                                   |
| chr10 | 103534171 | 103534715 | X:19 | 6  | + | FGF8:promoter                                 |
| chr10 | 103534171 | 103534715 | X:19 | 6  | + | FGF8:promoter, FGF8:5UTR                      |
| chr10 | 121578172 | 121578402 | X:28 | 11 | + | INPP5F:promoter                               |
| chr10 | 125447737 | 125450617 | X:19 | 6  | + | GPR26:3UTR                                    |
| chr10 | 126840910 | 126841148 | X:16 | 6  | + | CTBP2:intron                                  |
| chr10 | 134980773 | 134980953 | X:17 | 5  | + | KNDC1:CDS:2                                   |
| chr11 | 1948028   | 1949013   | X:29 | 7  | + | TNNT3:intron                                  |
| chr11 | 2159301   | 2159451   | X:21 | 6  | + | IGF2:intron, INS-IGF2:intron                  |
| chr11 | 2720829   | 2721027   | X:29 | 7  | + | KCNQ10T1:ncexon:1                             |
| chr11 | 13032404  | 13032746  | X:20 | 8  | + | RASSF10:CDS:1                                 |
| chr11 | 13689903  | 13690088  | X:19 | 15 | + | FAR1:promoter                                 |
| chr11 | 27722013  | 27722332  | X:38 | 6  | + | BDNF:promoter                                 |
| chr11 | 27722013  | 27722332  | X:38 | 6  | + | BDNF:promoter, BDNF:5UTR, BDNF:5UTR           |
| chr11 | 64120582  | 64120895  | X:17 | 6  | + | CCDC88B:CDS:21, CCDC88B:CDS:22                |
| chr11 | 66193851  | 66194008  | X:13 | 6  | + | NPAS4:3UTR                                    |
| chr11 | 69518419  | 69518639  | X:26 | 6  | + | FGF19:CDS:1                                   |
| chr12 | 3345678   | 3346257   | X:14 | 5  | + | TSPAN9:intron                                 |
| chr12 | 42983100  | 42983268  | X:15 | 11 | + | PRICKLE1:5UTR                                 |
| chr12 | 49208212  | 49208388  | X:15 | 8  | + | CACNB3:promoter, CACNB3:promoter              |
| chr12 | 49208212  | 49208388  | X:15 | 8  | + | CACNB3:promoter, CACNB3:promoter, CACNB3:5UTR |
| chr12 | 58239441  | 58239680  | X:23 | 5  | + | CTDSP2:intron                                 |

|       |           |           |      |    |   |                                                        |
|-------|-----------|-----------|------|----|---|--------------------------------------------------------|
| chr12 | 94580367  | 94580738  | X:19 | 5  | + | PLXNC1:intron                                          |
| chr12 | 115109568 | 115109701 | X:12 | 6  | + | TBX3:CDS:7                                             |
| chr12 | 115112443 | 115112608 | X:18 | 6  | + | TBX3:CDS:6                                             |
| chr12 | 120105873 | 120106085 | X:19 | 7  | + | PRKAB1:5UTR                                            |
| chr12 | 124242063 | 124242821 | X:10 | 7  | + | ATP6VOA2:CDS:20                                        |
| chr12 | 124873802 | 124874003 | X:17 | 10 | + | NCOR2:intron                                           |
| chr12 | 132628607 | 132628711 | X:19 | 5  | + | NOC4L:promoter                                         |
| chr13 | 78272441  | 78272829  | X:44 | 6  | + | SLAIN1:promoter                                        |
| chr13 | 109806752 | 109808000 | X:20 | 8  | + | MYO16:intron                                           |
| chr13 | 110953975 | 110954437 | X:13 | 6  | + | COL4A1:intron                                          |
| chr13 | 114565770 | 114565961 | X:17 | 7  | + | GAS6:intron                                            |
| chr14 | 24780256  | 24780463  | X:24 | 13 | + | LTB4R:promoter                                         |
| chr14 | 24780256  | 24780463  | X:24 | 13 | + | LTB4R:promoter, CIDEB:5UTR                             |
| chr14 | 55139594  | 55140493  | X:11 | 5  | + | SAMD4A:intron                                          |
| chr14 | 74222353  | 74223554  | X:18 | 5  | + | C14orf43:intron                                        |
| chr14 | 97263704  | 97264018  | X:51 | 15 | + | VRK1:promoter                                          |
| chr14 | 97263704  | 97264018  | X:51 | 15 | + | VRK1:promoter, VRK1:5UTR                               |
| chr14 | 102430943 | 102431130 | X:24 | 7  | + | DYNC1H1:promoter                                       |
| chr14 | 102430943 | 102431130 | X:24 | 7  | + | DYNC1H1:promoter, DYNC1H1:5UTR                         |
| chr15 | 20710460  | 20711337  | X:42 | 5  | + | HERC2P3:ncexon:2                                       |
| chr15 | 25200003  | 25200775  | X:54 | 13 | + | SNRPN:promoter, SNURF:promoter                         |
| chr15 | 25200003  | 25200775  | X:54 | 13 | + | SNRPN:promoter, SNURF:promoter, SNRPN:5UTR, SNURF:5UTR |
| chr15 | 40399722  | 40400614  | X:18 | 5  | + | BMF:promoter                                           |
| chr15 | 40399722  | 40400614  | X:18 | 5  | + | BMF:promoter, BMF:5UTR                                 |

|       |           |           |      |    |   |                                  |
|-------|-----------|-----------|------|----|---|----------------------------------|
| chr15 | 41061478  | 41062200  | X:22 | 5  | + | C15orf62:promoter                |
| chr15 | 41061478  | 41062200  | X:22 | 5  | + | C15orf62:promoter, C15orf62:5UTR |
| chr15 | 41787761  | 41788038  | X:25 | 5  | + | ITPKA:intron                     |
| chr15 | 45315202  | 45315418  | X:16 | 9  | + | SORD:promoter                    |
| chr15 | 45315202  | 45315418  | X:16 | 9  | + | SORD:promoter, SORD:5UTR         |
| chr15 | 67053256  | 67054632  | X:28 | 6  | + | SMAD6:intron                     |
| chr15 | 74427108  | 74427865  | X:40 | 9  | + | ISLR2:CDS:1                      |
| chr15 | 76634317  | 76634559  | X:14 | 12 | + | ISL2:3UTR                        |
| chr15 | 86314770  | 86315413  | X:12 | 5  | + | KLHL25:intron                    |
| chr15 | 100273533 | 100273946 | X:44 | 9  | + | LYSMD4:promoter                  |
| chr15 | 100273533 | 100273946 | X:44 | 9  | + | LYSMD4:promoter, LYSMD4:5UTR     |
| chr16 | 216315    | 216625    | X:32 | 17 | + | HBM:CDS:2, HBM:CDS:3             |
| chr16 | 433504    | 434082    | X:25 | 5  | + | LOC100134368:intron              |
| chr16 | 672297    | 672576    | X:25 | 10 | + | RAB40C:intron                    |
| chr16 | 1204446   | 1204878   | X:21 | 6  | + | CACNA1H:intron                   |
| chr16 | 2097589   | 2097729   | X:13 | 11 | + | TSC2:promoter                    |
| chr16 | 3304362   | 3304625   | X:24 | 6  | + | MEFV:CDS:2                       |
| chr16 | 24863072  | 24863842  | X:14 | 6  | + | SLC5A11:intron                   |
| chr16 | 27829315  | 27829980  | X:19 | 6  | + | GSG1L:intron                     |
| chr16 | 28936431  | 28936492  | X:11 | 9  | + | RABEP2:promoter                  |
| chr16 | 28936431  | 28936492  | X:11 | 9  | + | RABEP2:promoter, RABEP2:5UTR     |
| chr16 | 55364261  | 55365019  | X:30 | 11 | + | IRX6:3UTR                        |
| chr16 | 66613134  | 66613355  | X:32 | 7  | + | CMTM2:promoter                   |
| chr16 | 66613134  | 66613355  | X:32 | 7  | + | CMTM2:promoter, CMTM2:5UTR       |

|       |          |          |      |    |   |                                |
|-------|----------|----------|------|----|---|--------------------------------|
| chr16 | 78537144 | 78538574 | X:11 | 5  | + | WVOX:intron                    |
| chr16 | 85648027 | 85648263 | X:16 | 5  | + | KIAA0182:intron                |
| chr16 | 86612451 | 86612589 | X:13 | 5  | + | FOXL1:CDS:1                    |
| chr16 | 88540162 | 88540349 | X:14 | 5  | + | ZFPM1:intron                   |
| chr17 | 1969792  | 1970573  | X:18 | 5  | + | SMG6:intron                    |
| chr17 | 6347681  | 6347790  | X:11 | 8  | + | FAM64A:promoter                |
| chr17 | 6347681  | 6347790  | X:11 | 8  | + | FAM64A:promoter, FAM64A:5UTR   |
| chr17 | 7196058  | 7197162  | X:18 | 6  | + | YBX2:CDS:2                     |
| chr17 | 11900526 | 11900821 | X:37 | 10 | + | ZNF18:promoter                 |
| chr17 | 11900526 | 11900821 | X:37 | 10 | + | ZNF18:promoter, ZNF18:5UTR     |
| chr17 | 18585445 | 18585650 | X:17 | 10 | + | ZNF286B:promoter               |
| chr17 | 18585445 | 18585650 | X:17 | 10 | + | ZNF286B:promoter, ZNF286B:5UTR |
| chr17 | 37380676 | 37381143 | X:37 | 21 | + | STAC2:intron                   |
| chr17 | 59490308 | 59490809 | X:26 | 6  | + | C17orf82:ncexon:1              |
| chr17 | 77395836 | 77396488 | X:24 | 7  | + | RBFOX3:intron                  |
| chr17 | 79093142 | 79093348 | X:26 | 9  | + | AATK:CDS:11                    |
| chr17 | 79670077 | 79670280 | X:30 | 12 | + | MRPL12:promoter                |
| chr17 | 80290051 | 80290226 | X:13 | 6  | + | SECTM1:intron                  |
| chr17 | 80605959 | 80606237 | X:31 | 5  | + | WDR45L:5UTR                    |
| chr18 | 20715369 | 20715469 | X:14 | 5  | + | CABLES1:intron                 |
| chr18 | 21083110 | 21083275 | X:15 | 12 | + | C18orf8:promoter               |
| chr19 | 1009580  | 1009797  | X:14 | 5  | + | GRIN3B:CDS:9                   |
| chr19 | 1465410  | 1465639  | X:26 | 5  | + | APC2:CDS:14                    |
| chr19 | 2241107  | 2241325  | X:15 | 5  | + | SF3A2:intron                   |

|       |          |          |      |    |   |                                                                                                                                                                   |
|-------|----------|----------|------|----|---|-------------------------------------------------------------------------------------------------------------------------------------------------------------------|
| chr19 | 3668289  | 3668603  | X:14 | 6  | + | PIP5K1C:intron                                                                                                                                                    |
| chr19 | 4368257  | 4369372  | X:32 | 6  | + | SH3GL1:intron                                                                                                                                                     |
| chr19 | 4976449  | 4976931  | X:21 | 9  | + | KDM4B:intron                                                                                                                                                      |
| chr19 | 5340953  | 5341042  | X:14 | 9  | + | PTPRS:promoter                                                                                                                                                    |
| chr19 | 6750259  | 6750505  | X:15 | 6  | + | TRIP10:CDS:12                                                                                                                                                     |
| chr19 | 12983791 | 12984483 | X:45 | 10 | + | MAST1:CDS:25, MAST1:CDS:26                                                                                                                                        |
| chr19 | 14260390 | 14260774 | X:19 | 6  | + | LPHN1:3UTR                                                                                                                                                        |
| chr19 | 18548703 | 18548888 | X:21 | 6  | + | ISYNA1:promoter                                                                                                                                                   |
| chr19 | 18548703 | 18548888 | X:21 | 6  | + | ISYNA1:promoter, ISYNA1:5UTR                                                                                                                                      |
| chr19 | 30866169 | 30866489 | X:38 | 11 | + | ZNF536:intron                                                                                                                                                     |
| chr19 | 34113283 | 34113373 | X:14 | 5  | + | CHST8:intron                                                                                                                                                      |
| chr19 | 40366340 | 40366575 | X:26 | 6  | + | FCGBP:CDS:30                                                                                                                                                      |
| chr19 | 40421120 | 40421435 | X:32 | 8  | + | FCGBP:CDS:5                                                                                                                                                       |
| chr19 | 46196061 | 46196194 | X:11 | 8  | + | SNRPD2:promoter                                                                                                                                                   |
| chr19 | 48946126 | 48946668 | X:93 | 7  | + | GRIN2D:CDS:12                                                                                                                                                     |
| chr19 | 49561304 | 49561963 | X:26 | 7  | + | SNAR-A10:intron, SNAR-A7:intron, SNAR-A3:intron, SNAR-A4:intron, SNAR-A5:intron, SNAR-A14:intron, SNAR-A8:intron, SNAR-A6:intron, SNAR-A11:intron, SNAR-A9:intron |
| chr19 | 49935752 | 49935999 | X:23 | 6  | + | SLC17A7:CDS:9                                                                                                                                                     |
| chr19 | 51486749 | 51487309 | X:16 | 7  | + | KLK7:promoter                                                                                                                                                     |
| chr19 | 51486749 | 51487309 | X:16 | 7  | + | KLK7:promoter, KLK7:5UTR, KLK7:5UTR                                                                                                                               |
| chr19 | 55763066 | 55763326 | X:11 | 6  | + | PPP6R1:intron                                                                                                                                                     |
| chr19 | 58545285 | 58545420 | X:17 | 8  | + | ZSCAN1:promoter                                                                                                                                                   |
| chr19 | 58740222 | 58740358 | X:16 | 9  | + | ZNF544:promoter                                                                                                                                                   |

|       |           |           |      |    |   |                               |
|-------|-----------|-----------|------|----|---|-------------------------------|
| chr19 | 58740222  | 58740358  | X:16 | 9  | + | ZNF544:promoter, ZNF544:5UTR  |
| chr19 | 58867468  | 58867766  | X:36 | 6  | + | ZNF497:CDS:1                  |
| chr19 | 58879211  | 58879349  | X:18 | 7  | + | ZNF837:CDS:1                  |
| chr2  | 66672616  | 66673226  | X:42 | 12 | + | MEIS1:intron                  |
| chr2  | 74729802  | 74729915  | X:10 | 5  | + | LBX2:CDS:1                    |
| chr2  | 74781352  | 74781451  | X:12 | 5  | + | DOK1:promoter, LOXL3:promoter |
| chr2  | 88124677  | 88125044  | X:42 | 13 | + | RGPD2:intron, RGPD1:intron    |
| chr2  | 91844804  | 91845379  | X:21 | 5  | + | LOC654342:intron              |
| chr2  | 95787634  | 95787789  | X:20 | 13 | + | MRPS5:promoter                |
| chr2  | 95787634  | 95787789  | X:20 | 13 | + | MRPS5:promoter, MRPS5:5UTR    |
| chr2  | 120189353 | 120189544 | X:27 | 5  | + | TMEM37:promoter               |
| chr2  | 120189353 | 120189544 | X:27 | 5  | + | TMEM37:promoter, TMEM37:5UTR  |
| chr2  | 130691761 | 130691931 | X:17 | 12 | + | LOC389033:ncexon:1            |
| chr2  | 133014647 | 133014966 | X:26 | 6  | + | MIR663B:ncexon:1              |
| chr2  | 171570943 | 171571199 | X:26 | 6  | + | SP5:promoter                  |
| chr2  | 177029537 | 177029757 | X:21 | 6  | + | HOXD3:intron                  |
| chr2  | 177036436 | 177036608 | X:18 | 5  | + | HOXD3:CDS:2                   |
| chr2  | 192542655 | 192542828 | X:18 | 12 | + | OBFC2A:promoter               |
| chr2  | 192542655 | 192542828 | X:18 | 12 | + | OBFC2A:promoter, OBFC2A:5UTR  |
| chr2  | 200330906 | 200332521 | X:33 | 10 | + | SATB2:intron                  |
| chr2  | 223917511 | 223917734 | X:13 | 6  | + | KCNE4:promoter                |
| chr2  | 223917511 | 223917734 | X:13 | 6  | + | KCNE4:promoter, KCNE4:5UTR    |
| chr2  | 228337096 | 228337435 | X:39 | 10 | + | AGFG1:5UTR                    |
| chr20 | 15897688  | 15898740  | X:10 | 5  | + | MACROD2:intron                |



|       |          |          |      |    |   |                              |
|-------|----------|----------|------|----|---|------------------------------|
| chr20 | 21685400 | 21685841 | X:20 | 8  | + | PAX1:promoter                |
| chr20 | 30135112 | 30135362 | X:21 | 6  | + | PSIMCT-1:ncexon:1            |
| chr20 | 37434950 | 37435127 | X:18 | 8  | + | PPP1R16B:intron              |
| chr20 | 57465119 | 57465388 | X:31 | 6  | + | GNAS:intron                  |
| chr20 | 57766930 | 57767281 | X:39 | 5  | + | ZNF831:CDS:1                 |
| chr20 | 62120430 | 62120605 | X:16 | 5  | + | EEF1A2:CDS:6                 |
| chr21 | 15588309 | 15588491 | X:20 | 6  | + | RBM11:promoter               |
| chr21 | 15588309 | 15588491 | X:20 | 6  | + | RBM11:promoter, RBM11:5UTR   |
| chr21 | 34443296 | 34443508 | X:17 | 7  | + | OLIG1:CDS:1                  |
| chr21 | 43812801 | 43813768 | X:23 | 6  | + | TMPRSS3:intron               |
| chr21 | 45564710 | 45565141 | X:16 | 5  | + | C21orf33:CDS:6               |
| chr21 | 46826425 | 46827096 | X:27 | 6  | + | COL18A1:intron               |
| chr22 | 18064009 | 18064263 | X:14 | 5  | + | SLC25A18:CDS:3               |
| chr22 | 36766602 | 36767424 | X:15 | 6  | + | MYH9:intron                  |
| chr22 | 37261500 | 37261766 | X:13 | 6  | + | NCF4:intron                  |
| chr22 | 42084782 | 42084933 | X:16 | 16 | + | NHP2L1:promoter              |
| chr22 | 42084782 | 42084933 | X:16 | 16 | + | NHP2L1:promoter, NHP2L1:5UTR |
| chr22 | 48948274 | 48948708 | X:16 | 5  | + | FAM19A5:intron               |
| chr3  | 28390613 | 28390932 | X:24 | 9  | + | AZI2:promoter                |
| chr3  | 28390613 | 28390932 | X:24 | 9  | + | AZI2:promoter, AZI2:5UTR     |
| chr3  | 45837675 | 45837847 | X:18 | 10 | + | SLC6A20:CDS:1                |
| chr3  | 46975614 | 46977038 | X:16 | 6  | + | CCDC12:intron                |
| chr3  | 47844666 | 47844836 | X:14 | 8  | + | DHX30:5UTR                   |
| chr3  | 50273544 | 50273744 | X:26 | 9  | + | GNAI2:promoter               |

|      |           |           |      |    |   |                                         |
|------|-----------|-----------|------|----|---|-----------------------------------------|
| chr3 | 50273544  | 50273744  | X:26 | 9  | + | GNAI2:promoter, GNAI2:5UTR              |
| chr3 | 129305777 | 129306109 | X:13 | 5  | + | PLXND1:intron                           |
| chr3 | 133502608 | 133502725 | X:10 | 5  | + | SRPRB:promoter                          |
| chr3 | 147122696 | 147123473 | X:22 | 8  | + | ZIC4:promoter, ZIC4:promoter            |
| chr3 | 147122696 | 147123473 | X:22 | 8  | + | ZIC4:promoter, ZIC4:promoter, ZIC4:5UTR |
| chr4 | 1188632   | 1188760   | X:15 | 11 | + | SPON2:intron                            |
| chr4 | 13529671  | 13530416  | X:29 | 12 | + | LOC285547:ncexon:3                      |
| chr4 | 13542995  | 13543676  | X:23 | 6  | + | NKX3-2:CDS:2                            |
| chr4 | 57458843  | 57458974  | X:17 | 6  | + | THEGL:intron                            |
| chr4 | 81110244  | 81110530  | X:20 | 5  | + | PRDM8:intron                            |
| chr4 | 166033652 | 166033878 | X:22 | 6  | + | TMEM192:intron                          |
| chr4 | 187071281 | 187071868 | X:28 | 5  | + | FAM149A:intron                          |
| chr4 | 187124575 | 187124894 | X:10 | 7  | + | CYP4V2:intron                           |
| chr5 | 2748664   | 2748828   | X:21 | 9  | + | IRX2:CDS:3                              |
| chr5 | 10649619  | 10650054  | X:51 | 9  | + | ANKRD33B:CDS:4                          |
| chr5 | 31937105  | 31937829  | X:12 | 5  | + | PDZD2:intron                            |
| chr5 | 37249426  | 37249598  | X:23 | 18 | + | C5orf42:promoter                        |
| chr5 | 37249426  | 37249598  | X:23 | 18 | + | C5orf42:promoter, C5orf42:5UTR          |
| chr5 | 77944712  | 77945044  | X:43 | 13 | + | LHFPL2:promoter                         |
| chr5 | 92923024  | 92923551  | X:16 | 5  | + | NR2F1:intron                            |
| chr5 | 92924343  | 92926913  | X:57 | 11 | + | NR2F1:intron                            |
| chr5 | 112257909 | 112258099 | X:30 | 9  | + | REEP5:promoter                          |
| chr5 | 112257909 | 112258099 | X:30 | 9  | + | REEP5:promoter, REEP5:5UTR              |
| chr5 | 122434853 | 122435523 | X:47 | 7  | + | PRDM6:CDS:2                             |

|      |           |           |      |    |   |                                                                                                                                                  |
|------|-----------|-----------|------|----|---|--------------------------------------------------------------------------------------------------------------------------------------------------|
| chr5 | 133513400 | 133513712 | X:14 | 6  | + | SKP1:promoter                                                                                                                                    |
| chr5 | 135416032 | 135416725 | X:34 | 5  | + | VTRNA2-1:ncexon:1                                                                                                                                |
| chr5 | 140242203 | 140242414 | X:24 | 6  | + | PCDHA9:intron,PCDHA6:intron,PCDHA8:intron,PCDHA5:intron,PCDHA2:intron,<br>PCDHA4:intron,PCDHA10:intron,PCDHA1:intron,PCDHA7:intron,PCDHA3:intron |
| chr5 | 159688055 | 159688772 | X:19 | 5  | + | CCNJL:intron                                                                                                                                     |
| chr5 | 171433660 | 171433781 | X:11 | 5  | + | FBXW11:promoter                                                                                                                                  |
| chr5 | 171433660 | 171433781 | X:11 | 5  | + | FBXW11:promoter,FBXW11:5UTR                                                                                                                      |
| chr5 | 171614782 | 171614925 | X:16 | 9  | + | STK10:CDS:1                                                                                                                                      |
| chr5 | 180632027 | 180632401 | X:42 | 24 | + | TRIM7:promoter                                                                                                                                   |
| chr5 | 180632027 | 180632401 | X:42 | 24 | + | TRIM7:promoter,TRIM7:5UTR                                                                                                                        |
| chr6 | 12291677  | 12292901  | X:18 | 6  | + | EDN1:CDS:2                                                                                                                                       |
| chr6 | 18122832  | 18123164  | X:28 | 11 | + | NHLRC1:promoter                                                                                                                                  |
| chr6 | 18122832  | 18123164  | X:28 | 11 | + | NHLRC1:promoter,NHLRC1:5UTR                                                                                                                      |
| chr6 | 24495219  | 24495442  | X:30 | 7  | + | ALDH5A1:promoter                                                                                                                                 |
| chr6 | 24495219  | 24495442  | X:30 | 7  | + | ALDH5A1:promoter,ALDH5A1:5UTR                                                                                                                    |
| chr6 | 27441662  | 27441892  | X:13 | 9  | + | ZNF184:promoter                                                                                                                                  |
| chr6 | 34113719  | 34114207  | X:18 | 5  | + | GRM4:promoter                                                                                                                                    |
| chr6 | 34113719  | 34114207  | X:18 | 5  | + | GRM4:promoter,GRM4:5UTR                                                                                                                          |
| chr6 | 74008935  | 74009455  | X:41 | 6  | + | KHDC1:intron,C6orf147:intron                                                                                                                     |
| chr6 | 158438166 | 158438463 | X:14 | 5  | + | SYNJ2:promoter                                                                                                                                   |
| chr6 | 158438166 | 158438463 | X:14 | 5  | + | SYNJ2:promoter,SYNJ2:5UTR                                                                                                                        |
| chr6 | 159465764 | 159466690 | X:18 | 6  | + | TAGAP:promoter                                                                                                                                   |
| chr6 | 159465764 | 159466690 | X:18 | 6  | + | TAGAP:promoter,TAGAP:5UTR                                                                                                                        |
| chr6 | 160427262 | 160427616 | X:23 | 13 | + | IGF2R:intron                                                                                                                                     |

|      |           |           |      |    |   |                                                  |
|------|-----------|-----------|------|----|---|--------------------------------------------------|
| chr7 | 1094657   | 1094970   | X:20 | 7  | + | C7orf50:intron                                   |
| chr7 | 1272905   | 1273301   | X:42 | 14 | + | UNCX:CDS:1, UNCX:CDS:2                           |
| chr7 | 4831752   | 4832660   | X:72 | 5  | + | KIAA0415:3UTR                                    |
| chr7 | 5569549   | 5569825   | X:43 | 5  | + | ACTB:promoter                                    |
| chr7 | 5821071   | 5821244   | X:20 | 15 | + | RNF216:5UTR                                      |
| chr7 | 27206427  | 27206711  | X:14 | 6  | + | HOXA10-HOXA9:intron                              |
| chr7 | 40174597  | 40174734  | X:14 | 6  | + | C7orf11:promoter, C7orf10:promoter               |
| chr7 | 40174597  | 40174734  | X:14 | 6  | + | C7orf11:promoter, C7orf10:promoter, C7orf10:5UTR |
| chr7 | 66532130  | 66532662  | X:10 | 5  | + | TYW1:CDS:10                                      |
| chr7 | 87257532  | 87257703  | X:21 | 5  | + | RUNDC3B:promoter                                 |
| chr7 | 94023618  | 94023924  | X:18 | 5  | + | COL1A2:promoter                                  |
| chr7 | 94023618  | 94023924  | X:18 | 5  | + | COL1A2:promoter, COL1A2:5UTR                     |
| chr7 | 96631679  | 96632140  | X:20 | 9  | + | DLX6-AS1:intron                                  |
| chr7 | 99036585  | 99036945  | X:38 | 13 | + | CPSF4:promoter, PTC1:promoter                    |
| chr7 | 99036585  | 99036945  | X:38 | 13 | + | CPSF4:promoter, PTC1:promoter, CPSF4:5UTR        |
| chr7 | 100203398 | 100203599 | X:18 | 6  | + | PCOLCE:CDS:5                                     |
| chr7 | 100823267 | 100823455 | X:16 | 6  | + | NAT16:5UTR                                       |
| chr7 | 101049158 | 101049511 | X:15 | 6  | + | EMID2:intron                                     |
| chr7 | 127225542 | 127225723 | X:18 | 10 | + | GCC1:promoter                                    |
| chr7 | 127225542 | 127225723 | X:18 | 10 | + | GCC1:promoter, GCC1:5UTR                         |
| chr7 | 130130739 | 130130995 | X:26 | 11 | + | MEST:promoter                                    |
| chr7 | 145945389 | 145946093 | X:22 | 5  | + | CNTNAP2:intron                                   |
| chr7 | 157406375 | 157406737 | X:30 | 6  | + | PTPRN2:intron                                    |
| chr7 | 157576860 | 157577667 | X:29 | 5  | + | PTPRN2:intron                                    |

|      |           |           |      |    |   |                                |
|------|-----------|-----------|------|----|---|--------------------------------|
| chr7 | 157668518 | 157669348 | X:21 | 6  | + | PTPRN2:intron                  |
| chr8 | 1496930   | 1497185   | X:35 | 22 | + | DLGAP2:CDS:1                   |
| chr8 | 1950836   | 1951059   | X:32 | 6  | + | KBTBD11:CDS:1                  |
| chr8 | 8750331   | 8750534   | X:22 | 9  | + | MFHAS1:CDS:1                   |
| chr8 | 11272335  | 11272886  | X:10 | 5  | + | C8orf12:intron                 |
| chr8 | 22635193  | 22635576  | X:13 | 6  | + | PEBP4:intron                   |
| chr8 | 25896195  | 25897234  | X:25 | 5  | + | EBF2:intron                    |
| chr9 | 34637478  | 34637802  | X:36 | 8  | + | SIGMAR1:promoter               |
| chr9 | 34637478  | 34637802  | X:36 | 8  | + | SIGMAR1:promoter, SIGMAR1:5UTR |
| chr9 | 90112861  | 90113035  | X:18 | 5  | + | DAPK1:promoter                 |
| chr9 | 90112861  | 90113035  | X:18 | 5  | + | DAPK1:promoter, DAPK1:5UTR     |
| chr9 | 123476699 | 123476903 | X:29 | 9  | + | MEGF9:promoter                 |
| chr9 | 123476699 | 123476903 | X:29 | 9  | + | MEGF9:promoter, MEGF9:5UTR     |
| chr9 | 126692428 | 126692758 | X:30 | 9  | + | DENND1A:promoter               |
| chr9 | 130684061 | 130684177 | X:15 | 15 | + | PIP5KL1:CDS:4                  |
| chr9 | 131012953 | 131013323 | X:36 | 8  | + | DNM1:CDS:20                    |
| chr9 | 131939245 | 131939446 | X:22 | 5  | + | IER5L:CDS:1                    |
| chr9 | 133320154 | 133320631 | X:48 | 10 | + | ASS1:promoter                  |
| chr9 | 133320154 | 133320631 | X:48 | 10 | + | ASS1:promoter, ASS1:5UTR       |
| chr9 | 138078062 | 138079193 | X:30 | 5  | + | LOC401557:ncexon:3             |
| chrX | 16737358  | 16737799  | X:28 | 12 | + | SYAP1:promoter                 |
| chrX | 16737358  | 16737799  | X:28 | 12 | + | SYAP1:promoter, SYAP1:5UTR     |
| chrX | 19362105  | 19362392  | X:29 | 5  | + | PDHA1:promoter                 |
| chrX | 19362105  | 19362392  | X:29 | 5  | + | PDHA1:promoter, PDHA1:5UTR     |

|      |           |           |      |    |   |                                             |
|------|-----------|-----------|------|----|---|---------------------------------------------|
| chrX | 21392042  | 21392377  | X:36 | 5  | + | CNKS2:promoter                              |
| chrX | 100603685 | 100603839 | X:19 | 11 | + | TIMM8A:promoter                             |
| chrX | 100603685 | 100603839 | X:19 | 11 | + | TIMM8A:promoter, TIMM8A:5UTR                |
| chrX | 153043745 | 153044220 | X:19 | 6  | + | PLXNB3:CDS:32, PLXNB3:CDS:33, PLXNB3:CDS:34 |

---

Supplementary Table 6: The genes with hypor-methylated DMRs in the OST-7D group which located in the gene promoter

---

**gene symble**

---

ACTB  
ALDH5A1  
ASS1  
AZI2  
B3GALNT2  
BDNF  
BMF  
C15orf62  
C18orf8  
C5orf42  
C7orf10  
C7orf11  
CACNB3  
CMPK1  
CMTM2  
CNKSR2  
COL1A2  
CPSF4  
DAPK1  
DEGS1  
DENND1A

DKK1  
DOK1  
DYNC1H1  
FAM64A  
FAR1  
FBXW11  
FGF8  
GCC1  
GNAI2  
GRM4  
INPP5F  
ISYNA1  
KCNE4  
KLK7  
LGALS8  
LHFPL2  
LOXL3  
LTB4R  
LYSMD4  
MEGF9  
MEST  
MRPL12  
MRPS5  
NHLRC1



NHP2L1  
NLRP3  
NOC4L  
OBFC2A  
PAX1  
PDHA1  
PEX10  
PTCD1  
PTPRS  
RABEP2  
RBM11  
REEP5  
RUNDC3B  
RUNX3  
SIGMAR1  
SKP1  
SLAIN1  
SNAP47  
SNRPD2  
SNRPE  
SNRPN  
SNURF  
SORD  
SP5

SRPRB

SYAP1

SYNJ2

TAGAP

TIMM8A

TMEM37

TP73

TRIM7

TSC2

VRK1

WNT2B

ZIC4

ZNF18

ZNF184

ZNF286B

ZNF544

ZSCAN1

**Supplementary Table 7: The genes related DMRs between the OST-0D group and the OST-7D group by Radmeth methods analysis**

| Chr  | Start    | End      | Dmr | Num-sites | the value of Meth-diff | Gene associated regions |
|------|----------|----------|-----|-----------|------------------------|-------------------------|
| chr1 | 567205   | 567766   | dmr | 10        | -0.0229464             | LOC100133331:intron     |
| chr1 | 2425192  | 2425202  | dmr | 1         | -0.607407              | PLCH2:intron            |
| chr1 | 3164571  | 3164765  | dmr | 2         | -0.368367              | PRDM16:intron           |
| chr1 | 8698168  | 8698169  | dmr | 1         | 0.355556               | RERE:intron             |
| chr1 | 12365000 | 12365001 | dmr | 1         | 0.363636               | VPS13D:intron           |
| chr1 | 17091920 | 17091983 | dmr | 3         | 0.350362               | MIR3675:intron          |
| chr1 | 23066310 | 23066366 | dmr | 3         | -0.541667              | EPHB2:intron            |
| chr1 | 23720400 | 23720628 | dmr | 5         | 0.532581               | TCEA3:CDS:8             |
| chr1 | 28334835 | 28335026 | dmr | 2         | 0.350625               | EYA3:intron             |
| chr1 | 35344960 | 35345076 | dmr | 2         | 0.391597               | DLGAP3:intron           |
| chr1 | 35739062 | 35739067 | dmr | 2         | 0.289157               | ZMYM4:intron            |
| chr1 | 35853316 | 35853331 | dmr | 1         | 0.246359               | ZMYM4:intron            |
| chr1 | 39346611 | 39346788 | dmr | 2         | 0.309054               | GJA9-MYCBP:intron       |
| chr1 | 41553154 | 41553155 | dmr | 1         | 0.344615               | SCMH1:intron            |
| chr1 | 42790151 | 42790245 | dmr | 3         | 0.317187               | FOXJ3:promoter          |
| chr1 | 48819122 | 48819123 | dmr | 1         | 0.421429               | SPATA6:intron           |
| chr1 | 48930522 | 48930663 | dmr | 1         | 0.29708                | SPATA6:intron           |
| chr1 | 52759689 | 52759690 | dmr | 1         | 0.227273               | ZFYVE9:intron           |
| chr1 | 59002496 | 59002630 | dmr | 4         | 0.304056               | OMA1:intron             |
| chr1 | 59003625 | 59003644 | dmr | 2         | 0.311429               | OMA1:intron             |
| chr1 | 60317473 | 60317664 | dmr | 3         | 0.288807               | HOKK1:intron            |

|      |          |          |     |   |           |                                     |
|------|----------|----------|-----|---|-----------|-------------------------------------|
| chr1 | 61704899 | 61704938 | dmr | 1 | 0.260943  | NFIA:intron                         |
| chr1 | 61737927 | 61737978 | dmr | 1 | 0.226016  | NFIA:intron                         |
| chr1 | 63058714 | 63058715 | dmr | 1 | 0.342432  | DOCK7:intron                        |
| chr1 | 63128766 | 63128989 | dmr | 3 | 0.267032  | DOCK7:CDS:2                         |
| chr1 | 68310225 | 68310408 | dmr | 2 | 0.314199  | LOC100289178:intron                 |
| chr1 | 68325596 | 68325651 | dmr | 2 | 0.372451  | LOC100289178:intron                 |
| chr1 | 68955171 | 68955276 | dmr | 2 | 0.327847  | DEPDC1:CDS:3                        |
| chr1 | 70478692 | 70478877 | dmr | 3 | 0.281626  | LRRC7:CDS:11                        |
| chr1 | 71321220 | 71321234 | dmr | 3 | 0.359628  | PTGER3:intron                       |
| chr1 | 71534966 | 71535040 | dmr | 2 | 0.186862  | ZRANB2:CDS:8                        |
| chr1 | 72540098 | 72540268 | dmr | 1 | 0.266067  | NEGR1:intron                        |
| chr1 | 74662856 | 74662930 | dmr | 1 | 0.197648  | FPGT:promoter, FPGT-TNNI3K:promoter |
| chr1 | 76621623 | 76621685 | dmr | 1 | 0.290476  | ST6GALNAC3:intron                   |
| chr1 | 77629530 | 77629565 | dmr | 2 | 0.276471  | PIGK:CDS:6                          |
| chr1 | 78164646 | 78164647 | dmr | 1 | 0.354167  | USP33:intron                        |
| chr1 | 78339713 | 78339901 | dmr | 1 | 0.282849  | FAM73A:intron                       |
| chr1 | 78409261 | 78409546 | dmr | 3 | 0.270378  | NEXN:3UTR                           |
| chr1 | 82279817 | 82279818 | dmr | 1 | 0.441077  | LPHN2:intron                        |
| chr1 | 82396988 | 82397154 | dmr | 1 | 0.242892  | LPHN2:intron                        |
| chr1 | 86159953 | 86159954 | dmr | 1 | 0.353175  | ZNHIT6:intron                       |
| chr1 | 86261066 | 86261220 | dmr | 2 | 0.3401    | COL24A1:intron                      |
| chr1 | 89457268 | 89457565 | dmr | 4 | -0.395997 | RBMXL1:intron, CCBL2:intron         |
| chr1 | 90312540 | 90312696 | dmr | 3 | 0.262198  | LRRC8D:intron                       |
| chr1 | 91476874 | 91477100 | dmr | 3 | 0.271658  | ZNF644:intron                       |

|      |           |           |     |   |          |                                                                                   |
|------|-----------|-----------|-----|---|----------|-----------------------------------------------------------------------------------|
| chr1 | 93172105  | 93172238  | dmr | 2 | 0.361004 | EVI5:intron                                                                       |
| chr1 | 97236283  | 97236367  | dmr | 3 | 0.312745 | PTBP2:CDS:5                                                                       |
| chr1 | 97614364  | 97614365  | dmr | 1 | 0.354255 | DPYD:intron                                                                       |
| chr1 | 97666839  | 97666840  | dmr | 1 | 0.3125   | DPYD:intron                                                                       |
| chr1 | 97728021  | 97728022  | dmr | 1 | 0.423219 | DPYD:intron                                                                       |
| chr1 | 98230334  | 98230371  | dmr | 1 | 0.250754 | DPYD:intron                                                                       |
| chr1 | 98242508  | 98242557  | dmr | 3 | 0.313531 | DPYD:intron                                                                       |
| chr1 | 98260094  | 98260095  | dmr | 1 | 0.268293 | DPYD:intron                                                                       |
| chr1 | 98690171  | 98690364  | dmr | 3 | 0.293318 | LOC729987:intron                                                                  |
| chr1 | 103362096 | 103362107 | dmr | 2 | 0.339593 | COL11A1:intron                                                                    |
| chr1 | 107708892 | 107709041 | dmr | 3 | 0.344241 | NTNG1:intron                                                                      |
| chr1 | 109947664 | 109947858 | dmr | 2 | 0.355396 | PSMA5:intron                                                                      |
| chr1 | 111504388 | 111504481 | dmr | 2 | 0.315741 | LRIF1:intron                                                                      |
| chr1 | 113986086 | 113986266 | dmr | 2 | 0.292453 | MAGI3:intron                                                                      |
| chr1 | 114090051 | 114090179 | dmr | 1 | 0.228214 | MAGI3:intron                                                                      |
| chr1 | 115030709 | 115030876 | dmr | 4 | 0.320393 | TRIM33:intron                                                                     |
| chr1 | 116230796 | 116230882 | dmr | 2 | 0.411111 | VANGL1:intron                                                                     |
| chr1 | 117954829 | 117955015 | dmr | 3 | 0.283503 | MAN1A2:intron                                                                     |
| chr1 | 118407412 | 118407507 | dmr | 3 | 0.361763 | GDAP2:3UTR                                                                        |
| chr1 | 118478166 | 118478355 | dmr | 3 | 0.326943 | WDR3:intron                                                                       |
| chr1 | 120519903 | 120519904 | dmr | 1 | 0.185185 | NOTCH2:intron                                                                     |
| chr1 | 144990677 | 144990678 | dmr | 1 | 0.204949 | PDE4DIP:intron, FLJ39739:intron, LOC728855:intron, PPIAL4B:intron, PPIAL4A:intron |
| chr1 | 145241182 | 145241227 | dmr | 2 | 0.221322 | NOTCH2NL:intron, FLJ39739:intron, LOC728855:intron, PPIAL4B:intron, PPIA          |

|      |           |           |     |   |          |                                 |
|------|-----------|-----------|-----|---|----------|---------------------------------|
|      |           |           |     |   |          | L4A: intron                     |
| chr1 | 162472869 | 162472917 | dmr | 1 | 0.180025 | UHMK1: intron                   |
| chr1 | 169109100 | 169109247 | dmr | 3 | 0.346001 | NME7: intron                    |
| chr1 | 169777440 | 169777448 | dmr | 2 | 0.377049 | C1orf112: intron                |
| chr1 | 169942822 | 169942997 | dmr | 3 | 0.295231 | KIFAP3: intron                  |
| chr1 | 171813076 | 171813077 | dmr | 1 | 0.403226 | DNM3: intron                    |
| chr1 | 172117349 | 172117350 | dmr | 1 | 0.35101  | DNM3: intron                    |
| chr1 | 172118269 | 172118303 | dmr | 1 | 0.282458 | DNM3: intron                    |
| chr1 | 172549106 | 172549167 | dmr | 3 | 0.28529  | C1orf9: intron                  |
| chr1 | 175923526 | 175923641 | dmr | 2 | 0.399076 | RFWD2: intron                   |
| chr1 | 175978668 | 175978678 | dmr | 2 | 0.346154 | RFWD2: intron                   |
| chr1 | 176166821 | 176167018 | dmr | 3 | 0.305772 | RFWD2: intron                   |
| chr1 | 178241304 | 178241431 | dmr | 2 | 0.278413 | RASAL2: intron                  |
| chr1 | 178353971 | 178354126 | dmr | 3 | 0.266376 | RASAL2: intron                  |
| chr1 | 178858406 | 178858577 | dmr | 2 | 0.239123 | RALGPS2: intron                 |
| chr1 | 180010605 | 180010606 | dmr | 1 | 0.413665 | CEP350: intron                  |
| chr1 | 183637224 | 183637225 | dmr | 1 | 0.571429 | RGL1: intron                    |
| chr1 | 184702351 | 184702505 | dmr | 3 | 0.377004 | EDEM3: intron                   |
| chr1 | 184908014 | 184908089 | dmr | 3 | 0.44089  | FAM129A: intron                 |
| chr1 | 185018879 | 185018880 | dmr | 1 | 0.444444 | RNF2: intron                    |
| chr1 | 186155241 | 186155310 | dmr | 1 | 0.182877 | HMCN1: intron, MIR548F1: intron |
| chr1 | 186302107 | 186302108 | dmr | 1 | 0.326788 | TPR: intron, MIR548F1: intron   |
| chr1 | 186312533 | 186312716 | dmr | 2 | 0.271021 | TPR: CDS: 27                    |
| chr1 | 190143540 | 190143541 | dmr | 1 | 0.545455 | FAM5C: intron                   |

|      |           |           |     |   |          |                             |
|------|-----------|-----------|-----|---|----------|-----------------------------|
| chr1 | 192606270 | 192606366 | dmr | 3 | 0.345938 | RGS13:promoter              |
| chr1 | 192997806 | 192998012 | dmr | 5 | 0.319251 | UHL5:intron                 |
| chr1 | 196365961 | 196366102 | dmr | 3 | 0.280713 | KCNT2:intron                |
| chr1 | 196437443 | 196437444 | dmr | 1 | 0.340351 | KCNT2:intron                |
| chr1 | 197147551 | 197147664 | dmr | 3 | 0.325262 | ZBTB41:CDS:6                |
| chr1 | 197608774 | 197608809 | dmr | 3 | 0.402718 | DENND1B:intron              |
| chr1 | 198273098 | 198273099 | dmr | 1 | 0.312937 | NEK7:intron                 |
| chr1 | 198833507 | 198833508 | dmr | 1 | 0.267316 | LOC100131234:intron         |
| chr1 | 198900868 | 198901032 | dmr | 2 | 0.256372 | LOC100131234:intron         |
| chr1 | 202731475 | 202731607 | dmr | 2 | 0.27416  | KDM5B:intron                |
| chr1 | 212530530 | 212530648 | dmr | 3 | 0.354975 | PPP2R5A:CDS:11              |
| chr1 | 216495480 | 216495715 | dmr | 3 | 0.371871 | USH2A:intron                |
| chr1 | 216724829 | 216724924 | dmr | 1 | 0.300447 | ESRRG:intron                |
| chr1 | 217644330 | 217644331 | dmr | 1 | 0.371053 | GPATCH2:intron              |
| chr1 | 217774661 | 217774694 | dmr | 1 | 0.232323 | GPATCH2:intron              |
| chr1 | 220196023 | 220196193 | dmr | 2 | 0.271275 | EPRS:intron, RNU5F-1:intron |
| chr1 | 222747739 | 222747861 | dmr | 2 | 0.313725 | TAF1A:intron                |
| chr1 | 223173786 | 223173787 | dmr | 1 | 0.432692 | DISP1:intron                |
| chr1 | 224599128 | 224599246 | dmr | 2 | 0.295915 | WDR26:CDS:7                 |
| chr1 | 225592386 | 225592387 | dmr | 1 | 0.357143 | LBR:CDS:11                  |
| chr1 | 225682541 | 225682591 | dmr | 1 | 0.24055  | ENAH:3UTR                   |
| chr1 | 226434673 | 226434842 | dmr | 3 | 0.269585 | LIN9:intron                 |
| chr1 | 230822133 | 230822134 | dmr | 1 | 0.34632  | COG2:intron                 |
| chr1 | 233400534 | 233400535 | dmr | 1 | 0.342105 | PCNXL2:intron               |

|       |           |           |     |   |           |                             |
|-------|-----------|-----------|-----|---|-----------|-----------------------------|
| chr1  | 235335955 | 235336150 | dmr | 4 | 0.220324  | ARID4B:CDS:22               |
| chr1  | 237585645 | 237585811 | dmr | 3 | 0.306275  | RYR2:intron                 |
| chr1  | 243358689 | 243358890 | dmr | 3 | 0.266174  | CEP170:intron               |
| chr1  | 243535563 | 243535564 | dmr | 1 | 0.27295   | SDCCAG8:intron              |
| chr1  | 243586805 | 243586852 | dmr | 1 | 0.29798   | SDCCAG8:intron              |
| chr1  | 245135019 | 245135180 | dmr | 4 | -0.247271 | EFCAB2:intron               |
| chr1  | 245354997 | 245355133 | dmr | 1 | 0.281977  | KIF26B:intron               |
| chr1  | 246540054 | 246540176 | dmr | 3 | 0.272494  | SMYD3:intron                |
| chr1  | 247002354 | 247002525 | dmr | 3 | 0.307069  | AHCTF1:3UTR                 |
| chr10 | 251032    | 251073    | dmr | 2 | 0.343284  | ZMYND11:intron              |
| chr10 | 282322    | 282369    | dmr | 1 | 0.328283  | ZMYND11:intron              |
| chr10 | 11607060  | 11607227  | dmr | 3 | 0.327878  | USP6NL:intron               |
| chr10 | 16734724  | 16734725  | dmr | 1 | 0.483333  | RSU1:intron                 |
| chr10 | 16773682  | 16773683  | dmr | 1 | 0.3125    | RSU1:intron                 |
| chr10 | 17202031  | 17202230  | dmr | 2 | 0.349199  | TRDMT1:intron               |
| chr10 | 17636320  | 17636321  | dmr | 1 | 0.363739  | PTPLA:CDS:6                 |
| chr10 | 21418802  | 21418803  | dmr | 1 | 0.367857  | NEBL:intron                 |
| chr10 | 21979413  | 21979580  | dmr | 4 | 0.308317  | MLLT10:intron               |
| chr10 | 27047520  | 27047718  | dmr | 3 | 0.270566  | ABI1:intron                 |
| chr10 | 27518763  | 27518764  | dmr | 1 | 0.266667  | ACBD5:intron                |
| chr10 | 31627632  | 31627637  | dmr | 2 | 0.284615  | ZEB1:intron                 |
| chr10 | 32581510  | 32581568  | dmr | 4 | 0.337746  | EPC1:CDS:5                  |
| chr10 | 50712219  | 50712401  | dmr | 3 | 0.295491  | ERCC6:intron, FAM21B:intron |
| chr10 | 52754793  | 52754989  | dmr | 2 | 0.314367  | PRKG1:intron                |



|       |           |           |     |   |          |                 |
|-------|-----------|-----------|-----|---|----------|-----------------|
| chr10 | 54008234  | 54008408  | dmr | 2 | 0.329317 | PRKG1:intron    |
| chr10 | 60412366  | 60412374  | dmr | 2 | 0.325175 | BICC1:intron    |
| chr10 | 63981225  | 63981226  | dmr | 1 | 0.326667 | RTKN2:intron    |
| chr10 | 70549577  | 70549638  | dmr | 2 | 0.342895 | CCAR1:CDS:23    |
| chr10 | 70766653  | 70766694  | dmr | 1 | 0.375    | KIAA1279:intron |
| chr10 | 74526713  | 74526714  | dmr | 1 | 0.31875  | MCU:intron      |
| chr10 | 75801768  | 75801838  | dmr | 2 | 0.355426 | VCL:intron      |
| chr10 | 76023503  | 76023592  | dmr | 2 | 0.395664 | ADK:intron      |
| chr10 | 76068133  | 76068278  | dmr | 3 | 0.306088 | ADK:intron      |
| chr10 | 78083149  | 78083306  | dmr | 2 | 0.297529 | C10orf11:intron |
| chr10 | 88554389  | 88554390  | dmr | 1 | 0.324324 | BMPRI1A:intron  |
| chr10 | 93942968  | 93942969  | dmr | 1 | 0.287718 | CPEB3:intron    |
| chr10 | 94110759  | 94110858  | dmr | 1 | 0.233083 | MARCH5:CDS:6    |
| chr10 | 96336484  | 96336670  | dmr | 2 | 0.232471 | HELLS:CDS:10    |
| chr10 | 96344683  | 96344879  | dmr | 3 | 0.32134  | HELLS:intron    |
| chr10 | 97434189  | 97434262  | dmr | 3 | 0.373835 | TCTN3:intron    |
| chr10 | 114326154 | 114326298 | dmr | 3 | 0.338088 | VTI1A:intron    |
| chr10 | 114422183 | 114422184 | dmr | 1 | 0.342742 | VTI1A:intron    |
| chr10 | 114814473 | 114814516 | dmr | 2 | 0.337365 | TCF7L2:intron   |
| chr10 | 115606610 | 115606734 | dmr | 1 | 0.209727 | DCLRE1A:intron  |
| chr10 | 116731239 | 116731240 | dmr | 1 | 0.235294 | TRUB1:intron    |
| chr10 | 126662405 | 126662406 | dmr | 1 | 0.245588 | ZRANB1:intron   |
| chr10 | 129037887 | 129038060 | dmr | 4 | 0.284069 | DOCK1:intron    |
| chr11 | 9462591   | 9462701   | dmr | 2 | 0.363871 | IPO7:intron     |

|       |          |          |     |   |          |                 |
|-------|----------|----------|-----|---|----------|-----------------|
| chr11 | 9889988  | 9890021  | dmr | 2 | 0.292683 | SBF2:intron     |
| chr11 | 10226767 | 10226829 | dmr | 1 | 0.269398 | SBF2:intron     |
| chr11 | 10874261 | 10874262 | dmr | 1 | 0.311364 | ZBED5:ncexon:3  |
| chr11 | 11934436 | 11934564 | dmr | 1 | 0.248793 | USP47:intron    |
| chr11 | 13433197 | 13433198 | dmr | 1 | 0.341463 | BTBD10:intron   |
| chr11 | 16239493 | 16239663 | dmr | 3 | 0.318134 | SOX6:intron     |
| chr11 | 17141871 | 17141872 | dmr | 1 | 0.306713 | PIK3C2A:intron  |
| chr11 | 20431720 | 20431721 | dmr | 1 | 0.347967 | PRMT3:intron    |
| chr11 | 24773539 | 24773730 | dmr | 3 | 0.347356 | LUZP2:intron    |
| chr11 | 28218675 | 28218777 | dmr | 3 | 0.303883 | METTL15:intron  |
| chr11 | 28246036 | 28246478 | dmr | 5 | 0.344889 | METTL15:intron  |
| chr11 | 28261820 | 28262006 | dmr | 3 | 0.29586  | METTL15:intron  |
| chr11 | 28285151 | 28285152 | dmr | 1 | 0.302326 | METTL15:intron  |
| chr11 | 28343407 | 28343408 | dmr | 1 | 0.321429 | METTL15:intron  |
| chr11 | 31511368 | 31511545 | dmr | 4 | 0.329058 | IMMP1L:intron   |
| chr11 | 31661078 | 31661248 | dmr | 3 | 0.345307 | ELP4:intron     |
| chr11 | 32990944 | 32991051 | dmr | 2 | 0.285621 | QSER1:intron    |
| chr11 | 33133123 | 33133235 | dmr | 3 | 0.29853  | CSTF3:intron    |
| chr11 | 34953896 | 34954057 | dmr | 2 | 0.252301 | PDHX:intron     |
| chr11 | 34971662 | 34971663 | dmr | 1 | 0.4      | PDHX:intron     |
| chr11 | 43850422 | 43850455 | dmr | 3 | 0.334915 | HSD17B12:intron |
| chr11 | 44325657 | 44325865 | dmr | 4 | 0.509895 | ALX4:intron     |
| chr11 | 47046838 | 47046907 | dmr | 3 | 0.308642 | C11orf49:intron |
| chr11 | 63371515 | 63371720 | dmr | 3 | 0.355789 | PLA2G16:intron  |

|       |           |           |     |   |          |                  |
|-------|-----------|-----------|-----|---|----------|------------------|
| chr11 | 67947752  | 67947817  | dmr | 2 | 0.309559 | SUV420H1:intron  |
| chr11 | 75809055  | 75809144  | dmr | 3 | 0.28352  | UVRAG:intron     |
| chr11 | 77450626  | 77450780  | dmr | 3 | 0.287146 | RSF1:intron      |
| chr11 | 78238008  | 78238104  | dmr | 3 | 0.249824 | NARS2:intron     |
| chr11 | 86766601  | 86766602  | dmr | 1 | 0.287879 | TMEM135:intron   |
| chr11 | 95645812  | 95645813  | dmr | 1 | 0.333333 | MTMR2:intron     |
| chr11 | 100730292 | 100730299 | dmr | 1 | 0.279266 | ARHGAP42:CDS:4   |
| chr11 | 102208176 | 102208177 | dmr | 1 | 0.457143 | BIRC3:3UTR       |
| chr11 | 103139282 | 103139291 | dmr | 2 | 0.44251  | DYNC2H1:intron   |
| chr11 | 107321318 | 107321319 | dmr | 1 | 0.230769 | CWF19L2:intron   |
| chr11 | 107960165 | 107960166 | dmr | 1 | 0.368421 | CUL5:intron      |
| chr11 | 108155278 | 108155488 | dmr | 3 | 0.299273 | ATM:intron       |
| chr11 | 108163916 | 108164101 | dmr | 2 | 0.335065 | ATM:CDS:30       |
| chr11 | 108597944 | 108598121 | dmr | 3 | 0.29858  | DDX10:intron     |
| chr11 | 108639512 | 108639547 | dmr | 2 | 0.314892 | DDX10:intron     |
| chr11 | 110144519 | 110144624 | dmr | 3 | 0.32545  | RDX:intron       |
| chr11 | 111909781 | 111909819 | dmr | 3 | 0.254212 | DLAT:intron      |
| chr11 | 120319762 | 120319893 | dmr | 2 | 0.173559 | ARHGEF12:CDS:21  |
| chr11 | 130174147 | 130174198 | dmr | 2 | 0.465672 | ZBTB44:intron    |
| chr12 | 940174    | 940205    | dmr | 1 | 0.268421 | WNK1:intron      |
| chr12 | 1188037   | 1188363   | dmr | 3 | 0.312692 | ERC1:intron      |
| chr12 | 1871722   | 1871731   | dmr | 2 | 0.288961 | ADIPOR2:intron   |
| chr12 | 10369598  | 10369631  | dmr | 2 | 0.422222 | GABARAPL1:intron |
| chr12 | 14613165  | 14613201  | dmr | 2 | 0.308653 | ATF7IP:intron    |

|       |          |          |     |   |          |                  |
|-------|----------|----------|-----|---|----------|------------------|
| chr12 | 18459797 | 18459963 | dmr | 3 | 0.311677 | PIK3C2G:intron   |
| chr12 | 18862900 | 18862997 | dmr | 3 | 0.339758 | PLCZ1:intron     |
| chr12 | 19499059 | 19499240 | dmr | 2 | 0.304832 | PLEKHA5:intron   |
| chr12 | 20571645 | 20571646 | dmr | 1 | 0.375458 | PDE3A:intron     |
| chr12 | 22624760 | 22624761 | dmr | 1 | 0.333333 | KIAA0528:intron  |
| chr12 | 22658485 | 22658618 | dmr | 1 | 0.290148 | KIAA0528:intron  |
| chr12 | 22659658 | 22659702 | dmr | 2 | 0.430769 | KIAA0528:CDS:9   |
| chr12 | 24477322 | 24477476 | dmr | 2 | 0.294925 | SOX5:intron      |
| chr12 | 28424976 | 28425008 | dmr | 3 | 0.466725 | CCDC91:intron    |
| chr12 | 28454089 | 28454230 | dmr | 2 | 0.372764 | CCDC91:intron    |
| chr12 | 29520174 | 29520329 | dmr | 3 | 0.316362 | ERGIC2:intron    |
| chr12 | 30810824 | 30810825 | dmr | 1 | 0.32     | IPO8:intron      |
| chr12 | 30885658 | 30885810 | dmr | 3 | 0.271824 | CAPRIN2:intron   |
| chr12 | 39702586 | 39702766 | dmr | 3 | 0.342929 | KIF21A:intron    |
| chr12 | 44468215 | 44468385 | dmr | 3 | 0.321929 | TMEM117:intron   |
| chr12 | 46637538 | 46637574 | dmr | 1 | 0.244721 | SLC38A1:promoter |
| chr12 | 48460019 | 48460026 | dmr | 2 | 0.338827 | SENP1:intron     |
| chr12 | 62718777 | 62718960 | dmr | 3 | 0.29373  | USP15:intron     |
| chr12 | 65033116 | 65033117 | dmr | 1 | 0.297619 | RASSF3:intron    |
| chr12 | 69236269 | 69236270 | dmr | 1 | 0.37931  | MDM2:3UTR        |
| chr12 | 72050154 | 72050331 | dmr | 3 | 0.312401 | ZFC3H1:intron    |
| chr12 | 75731416 | 75731648 | dmr | 4 | 0.305015 | GLIPR1L1:intron  |
| chr12 | 75795251 | 75795351 | dmr | 2 | 0.356463 | GLIPR1L2:intron  |
| chr12 | 77448975 | 77449040 | dmr | 2 | 0.359375 | E2F7:intron      |

|       |           |           |     |   |          |                 |
|-------|-----------|-----------|-----|---|----------|-----------------|
| chr12 | 79370466  | 79370664  | dmr | 2 | 0.277498 | SYT1:promoter   |
| chr12 | 80184367  | 80184434  | dmr | 1 | 0.267654 | PPP1R12A:intron |
| chr12 | 80200983  | 80201169  | dmr | 2 | 0.220163 | PPP1R12A:CDS:11 |
| chr12 | 80324833  | 80325024  | dmr | 4 | 0.338727 | PPP1R12A:intron |
| chr12 | 81024364  | 81024564  | dmr | 2 | 0.342931 | PTPRQ:intron    |
| chr12 | 81302598  | 81302787  | dmr | 3 | 0.304492 | LIN7A:intron    |
| chr12 | 86717419  | 86717590  | dmr | 3 | 0.290585 | MGAT4C:intron   |
| chr12 | 86876563  | 86876564  | dmr | 1 | 0.300785 | MGAT4C:intron   |
| chr12 | 87225991  | 87225992  | dmr | 1 | 0.25     | MGAT4C:intron   |
| chr12 | 88497081  | 88497082  | dmr | 1 | 0.27619  | CEP290:intron   |
| chr12 | 88969713  | 88969913  | dmr | 3 | 0.31617  | KITLG:intron    |
| chr12 | 94091332  | 94091340  | dmr | 1 | 0.308362 | CRADD:intron    |
| chr12 | 95625479  | 95625589  | dmr | 3 | 0.310714 | VEZT:intron     |
| chr12 | 95660168  | 95660382  | dmr | 4 | 0.324206 | VEZT:CDS:5      |
| chr12 | 95669575  | 95669744  | dmr | 3 | 0.29558  | VEZT:intron     |
| chr12 | 96764423  | 96764677  | dmr | 3 | 0.263889 | CDK17:intron    |
| chr12 | 99099687  | 99099733  | dmr | 3 | 0.434211 | APAF1:intron    |
| chr12 | 100732033 | 100732163 | dmr | 2 | 0.313865 | SCYL2:intron    |
| chr12 | 101016041 | 101016125 | dmr | 1 | 0.227385 | GAS2L3:CDS:7    |
| chr12 | 102151035 | 102151060 | dmr | 3 | 0.299065 | GNPTAB:CDS:18   |
| chr12 | 102199614 | 102199800 | dmr | 4 | 0.272657 | GNPTAB:intron   |
| chr12 | 102505093 | 102505236 | dmr | 3 | 0.299167 | NUP37:intron    |
| chr12 | 105440677 | 105440719 | dmr | 1 | 0.281981 | ALDH1L2:CDS:14  |
| chr12 | 105540785 | 105541004 | dmr | 3 | 0.184712 | KIAA1033:CDS:24 |

|       |           |           |     |   |           |                 |
|-------|-----------|-----------|-----|---|-----------|-----------------|
| chr12 | 109073496 | 109073667 | dmr | 3 | 0.248055  | CORO1C:intron   |
| chr12 | 111992114 | 111992247 | dmr | 3 | 0.270865  | ATXN2:intron    |
| chr12 | 120274459 | 120274465 | dmr | 1 | 0.258065  | CIT:intron      |
| chr12 | 124203180 | 124203181 | dmr | 1 | 0.241379  | ATP6VOA2:CDS:2  |
| chr12 | 124242215 | 124242316 | dmr | 3 | -0.297466 | ATP6VOA2:intron |
| chr12 | 133618338 | 133618432 | dmr | 3 | 0.208333  | ZNF84:intron    |
| chr12 | 133757479 | 133757755 | dmr | 2 | 0.206664  | ZNF268:promoter |
| chr13 | 20576545  | 20576594  | dmr | 1 | 0.359597  | ZMYM2:intron    |
| chr13 | 21429256  | 21429257  | dmr | 1 | 0.318182  | XPO4:intron     |
| chr13 | 26975256  | 26975257  | dmr | 1 | 0.205051  | CDK8:intron     |
| chr13 | 27660521  | 27660656  | dmr | 3 | 0.363553  | USP12:intron    |
| chr13 | 27731513  | 27731574  | dmr | 2 | 0.301198  | USP12:intron    |
| chr13 | 28228180  | 28228181  | dmr | 1 | 0.346154  | POLR1D:intron   |
| chr13 | 32920977  | 32921146  | dmr | 4 | 0.291112  | BRCA2:CDS:12    |
| chr13 | 33084269  | 33084316  | dmr | 2 | 0.394195  | N4BP2L2:intron  |
| chr13 | 33719436  | 33719528  | dmr | 3 | 0.222222  | STARD13:intron  |
| chr13 | 34127366  | 34127551  | dmr | 2 | 0.364274  | STARD13:intron  |
| chr13 | 35531960  | 35532099  | dmr | 3 | 0.307384  | NBEA:intron     |
| chr13 | 35814194  | 35814269  | dmr | 1 | 0.241841  | NBEA:intron     |
| chr13 | 37605646  | 37605647  | dmr | 1 | 0.294077  | FAM48A:intron   |
| chr13 | 41906634  | 41906635  | dmr | 1 | 0.366667  | NAA16:intron    |
| chr13 | 42279213  | 42279251  | dmr | 2 | 0.273684  | KIAA0564:intron |
| chr13 | 42867247  | 42867368  | dmr | 3 | 0.319195  | AKAP11:intron   |
| chr13 | 46617683  | 46617820  | dmr | 3 | 0.293485  | ZC3H13:intron   |

|       |          |          |     |   |           |                                    |
|-------|----------|----------|-----|---|-----------|------------------------------------|
| chr13 | 48909182 | 48909208 | dmr | 2 | 0.272683  | RB1:intron                         |
| chr13 | 48941500 | 48941653 | dmr | 3 | 0.30303   | RB1:CDS:10                         |
| chr13 | 49748670 | 49748671 | dmr | 1 | 0.30031   | FNDC3A:CDS:10                      |
| chr13 | 49923363 | 49923499 | dmr | 3 | 0.460317  | CAB39L:intron                      |
| chr13 | 53216582 | 53216743 | dmr | 3 | 0.224129  | HNRNPA1L2:promoter                 |
| chr13 | 53216582 | 53216743 | dmr | 3 | 0.224129  | HNRNPA1L2:promoter, HNRNPA1L2:5UTR |
| chr13 | 60552627 | 60552628 | dmr | 1 | 0.307018  | DIAPH3:intron                      |
| chr13 | 60689749 | 60689750 | dmr | 1 | 0.324324  | DIAPH3:intron                      |
| chr13 | 60700599 | 60700750 | dmr | 2 | 0.216633  | DIAPH3:intron                      |
| chr13 | 61120993 | 61121052 | dmr | 3 | 0.284927  | TDRD3:intron                       |
| chr13 | 67219603 | 67219604 | dmr | 1 | 0.3       | PCDH9:intron                       |
| chr13 | 67250005 | 67250167 | dmr | 5 | -0.528061 | PCDH9:intron                       |
| chr13 | 67574927 | 67574928 | dmr | 1 | 0.379345  | PCDH9:intron                       |
| chr13 | 67731216 | 67731410 | dmr | 4 | 0.274336  | PCDH9:intron                       |
| chr13 | 73325784 | 73325890 | dmr | 2 | 0.248839  | BORA:intron                        |
| chr13 | 77702145 | 77702209 | dmr | 3 | 0.430446  | MYCBP2:intron                      |
| chr13 | 77755724 | 77755895 | dmr | 1 | 0.309514  | MYCBP2:CDS:33                      |
| chr13 | 77847766 | 77847895 | dmr | 3 | 0.360617  | MYCBP2:CDS:5                       |
| chr13 | 93175157 | 93175473 | dmr | 3 | 0.37157   | GPC5:intron                        |
| chr13 | 93963058 | 93963120 | dmr | 1 | 0.264039  | GPC6:intron                        |
| chr13 | 93973073 | 93973178 | dmr | 2 | 0.293007  | GPC6:intron                        |
| chr13 | 94070859 | 94071097 | dmr | 4 | 0.342451  | GPC6:intron                        |
| chr13 | 95696069 | 95696070 | dmr | 1 | 0.324324  | ABCC4:intron                       |
| chr13 | 98882116 | 98882309 | dmr | 2 | 0.277228  | FARP1:intron                       |

|       |           |           |     |   |          |                                 |
|-------|-----------|-----------|-----|---|----------|---------------------------------|
| chr13 | 100916123 | 100916426 | dmr | 2 | 0.347908 | PCCA:intron                     |
| chr13 | 101051267 | 101051544 | dmr | 3 | 0.334892 | PCCA:intron                     |
| chr13 | 101776553 | 101776554 | dmr | 1 | 0.5      | NALCN:intron                    |
| chr13 | 101974032 | 101974218 | dmr | 3 | 0.32368  | NALCN:intron                    |
| chr13 | 103520470 | 103520607 | dmr | 2 | 0.299046 | ERCC5:CDS:12, BIVM-ERCC5:CDS:20 |
| chr13 | 108095249 | 108095250 | dmr | 1 | 0.274428 | FAM155A:intron                  |
| chr13 | 108886160 | 108886314 | dmr | 3 | 0.324101 | ABHD13:ncexon:2                 |
| chr13 | 109756159 | 109756355 | dmr | 2 | 0.281933 | MYO16:intron                    |
| chr14 | 32588383  | 32588384  | dmr | 1 | 0.229365 | ARHGAP5:intron                  |
| chr14 | 33114446  | 33114677  | dmr | 3 | 0.29578  | AKAP6:intron                    |
| chr14 | 34141409  | 34141410  | dmr | 1 | 0.24     | NPAS3:intron                    |
| chr14 | 36244915  | 36244916  | dmr | 1 | 0.296228 | RALGAPA1:CDS:2                  |
| chr14 | 37794422  | 37794477  | dmr | 3 | 0.336088 | MIPOL1:intron                   |
| chr14 | 39514390  | 39514391  | dmr | 1 | 0.318182 | SEC23A:CDS:15                   |
| chr14 | 39773832  | 39774009  | dmr | 1 | 0.243309 | CTAGE5:intron                   |
| chr14 | 39776208  | 39776221  | dmr | 1 | 0.233949 | CTAGE5:intron                   |
| chr14 | 39806241  | 39806350  | dmr | 1 | 0.25487  | CTAGE5:intron                   |
| chr14 | 42229368  | 42229405  | dmr | 2 | 0.326923 | LRFN5:intron                    |
| chr14 | 45472465  | 45472562  | dmr | 3 | 0.272059 | FAM179B:intron                  |
| chr14 | 50904786  | 50904819  | dmr | 3 | 0.314362 | MAP4K5:intron                   |
| chr14 | 50915236  | 50915363  | dmr | 3 | 0.385375 | MAP4K5:intron                   |
| chr14 | 57706025  | 57706026  | dmr | 1 | 0.333333 | EXOC5:intron                    |
| chr14 | 61363954  | 61363955  | dmr | 1 | 0.25     | MNAT1:intron                    |
| chr14 | 65983539  | 65983591  | dmr | 3 | 0.368222 | FUT8:intron                     |



|       |          |          |     |   |           |                                                        |
|-------|----------|----------|-----|---|-----------|--------------------------------------------------------|
| chr14 | 67002387 | 67002530 | dmr | 4 | 0.295517  | GPHN:intron                                            |
| chr14 | 67267059 | 67267077 | dmr | 3 | 0.288506  | GPHN:intron                                            |
| chr14 | 68875399 | 68875400 | dmr | 1 | 0.312069  | RAD51B:intron                                          |
| chr14 | 71996223 | 71996224 | dmr | 1 | 0.25515   | SIPA1L1:intron                                         |
| chr14 | 73572942 | 73572943 | dmr | 1 | 0.578947  | RBM25:CDS:11                                           |
| chr14 | 81388929 | 81388930 | dmr | 1 | 0.347902  | CEP128:intron                                          |
| chr14 | 81963528 | 81963529 | dmr | 1 | 0.261905  | SEL1L:intron                                           |
| chr14 | 88971789 | 88971790 | dmr | 1 | 0.386202  | PTPN21:intron                                          |
| chr14 | 92438419 | 92438584 | dmr | 2 | 0.268404  | TRIP11:intron                                          |
| chr14 | 97001620 | 97001621 | dmr | 1 | 0.343605  | PAPOLA:3UTR                                            |
| chr14 | 97004290 | 97004375 | dmr | 2 | 0.242325  | PAPOLA:intron                                          |
| chr15 | 24724872 | 24724873 | dmr | 1 | 0.4375    | MIR4509-3:intron, MIR4509-2:intron, MIR4509-1:intron   |
| chr15 | 25200003 | 25200253 | dmr | 4 | -0.515487 | SNRPN:promoter, SNURF:promoter                         |
| chr15 | 25200003 | 25200253 | dmr | 4 | -0.515487 | SNRPN:promoter, SNURF:promoter, SNRPN:5UTR, SNURF:5UTR |
| chr15 | 30036794 | 30036974 | dmr | 2 | 0.25565   | TJP1:intron                                            |
| chr15 | 31203203 | 31203418 | dmr | 4 | 0.282651  | FAN1:3UTR                                              |
| chr15 | 36131131 | 36131296 | dmr | 4 | 0.489838  | LOC100507466:intron                                    |
| chr15 | 36973776 | 36973929 | dmr | 2 | 0.285227  | C15orf41:intron                                        |
| chr15 | 37389383 | 37389395 | dmr | 1 | -0.414286 | MEIS2:intron                                           |
| chr15 | 38756432 | 38756433 | dmr | 1 | 0.266667  | FAM98B:intron                                          |
| chr15 | 40920781 | 40920983 | dmr | 4 | 0.25903   | CASC5:CDS:12                                           |
| chr15 | 44685090 | 44685091 | dmr | 1 | 0.287879  | CASC4:intron                                           |
| chr15 | 44745204 | 44745205 | dmr | 1 | 0.285714  | CTDSPL2:intron                                         |
| chr15 | 45796598 | 45796764 | dmr | 3 | 0.316236  | SLC30A4:intron                                         |

|       |           |           |     |   |           |                  |
|-------|-----------|-----------|-----|---|-----------|------------------|
| chr15 | 49335356  | 49335533  | dmr | 2 | 0.359726  | SECISBP2L:intron |
| chr15 | 49443724  | 49443744  | dmr | 2 | 0.37688   | COPS2:intron     |
| chr15 | 50315483  | 50315528  | dmr | 3 | 0.482385  | ATP8B4:intron    |
| chr15 | 50885672  | 50885829  | dmr | 2 | 0.283106  | TRPM7:CDS:25     |
| chr15 | 50927095  | 50927289  | dmr | 2 | 0.203632  | TRPM7:intron     |
| chr15 | 56226732  | 56226733  | dmr | 1 | 0.323684  | NEDD4:intron     |
| chr15 | 56462265  | 56462303  | dmr | 2 | 0.295267  | RFX7:intron      |
| chr15 | 56488627  | 56488628  | dmr | 1 | 0.251232  | RFX7:intron      |
| chr15 | 56686783  | 56686925  | dmr | 1 | 0.225443  | TEX9:CDS:9       |
| chr15 | 56935175  | 56935390  | dmr | 4 | 0.292695  | ZNF280D:CDS:17   |
| chr15 | 56996745  | 56996746  | dmr | 1 | 0.214286  | ZNF280D:promoter |
| chr15 | 57402065  | 57402219  | dmr | 3 | 0.342696  | TCF12:intron     |
| chr15 | 59191462  | 59191463  | dmr | 1 | 0.371429  | SLTM:intron      |
| chr15 | 59342618  | 59342619  | dmr | 1 | 0.258065  | RNF111:intron    |
| chr15 | 59491743  | 59491923  | dmr | 2 | 0.292689  | MYO1E:intron     |
| chr15 | 64088660  | 64088689  | dmr | 2 | 0.319167  | HERC1:intron     |
| chr15 | 71220491  | 71220650  | dmr | 3 | 0.28184   | LRRC49:intron    |
| chr15 | 72169604  | 72169611  | dmr | 1 | 0.217669  | MYO9A:intron     |
| chr15 | 76634307  | 76634694  | dmr | 6 | -0.352876 | ISL2:3UTR        |
| chr15 | 76705226  | 76705253  | dmr | 2 | 0.325594  | SCAPER:intron    |
| chr15 | 86100493  | 86100494  | dmr | 1 | 0.357143  | AKAP13:intron    |
| chr15 | 99784829  | 99784830  | dmr | 1 | 0.336898  | TTC23:intron     |
| chr15 | 100674365 | 100674366 | dmr | 1 | 0.571429  | ADAMTS17:intron  |
| chr16 | 7087134   | 7087135   | dmr | 1 | -0.503676 | RBFOX1:intron    |

|       |          |          |     |   |           |                              |
|-------|----------|----------|-----|---|-----------|------------------------------|
| chr16 | 14307140 | 14307149 | dmr | 2 | 0.313549  | MKL2:intron                  |
| chr16 | 24765563 | 24765726 | dmr | 3 | 0.300952  | TNRC6A:intron                |
| chr16 | 56466591 | 56466615 | dmr | 1 | 0.21866   | NUDT21:3UTR                  |
| chr16 | 67078249 | 67078250 | dmr | 1 | 0.34188   | CBFB:intron                  |
| chr16 | 69666325 | 69666515 | dmr | 3 | 0.249649  | NFAT5:intron                 |
| chr16 | 79006762 | 79006898 | dmr | 3 | -0.361539 | WVOX:intron                  |
| chr16 | 80580459 | 80580581 | dmr | 1 | 0.165404  | DYNLRB2:intron               |
| chr16 | 87431334 | 87431335 | dmr | 1 | 0.257143  | MAP1LC3B:intron              |
| chr17 | 8472648  | 8472716  | dmr | 2 | 0.243111  | MYH10:intron                 |
| chr17 | 12007035 | 12007152 | dmr | 2 | 0.349528  | MAP2K4:intron                |
| chr17 | 16034860 | 16034971 | dmr | 2 | 0.273183  | NCOR1:intron                 |
| chr17 | 20178209 | 20178349 | dmr | 2 | 0.31746   | SPECC1:intron                |
| chr17 | 28055296 | 28055421 | dmr | 1 | 0.316303  | SSH2:intron                  |
| chr17 | 40422339 | 40422340 | dmr | 1 | -0.344828 | STAT5B:intron                |
| chr17 | 54934928 | 54935078 | dmr | 1 | 0.22119   | DGKE:intron                  |
| chr17 | 56801292 | 56801489 | dmr | 2 | 0.290278  | RAD51C:CDS:7                 |
| chr17 | 57158491 | 57158532 | dmr | 3 | 0.296982  | TRIM37:CDS:6                 |
| chr17 | 58911036 | 58911041 | dmr | 1 | 0.288576  | BCAS3:intron                 |
| chr17 | 59899440 | 59899567 | dmr | 2 | 0.292488  | BRIP1:intron                 |
| chr17 | 60053645 | 60053710 | dmr | 1 | 0.369907  | MED13:intron                 |
| chr17 | 60721217 | 60721218 | dmr | 1 | 0.30303   | MRC2:intron                  |
| chr17 | 61213122 | 61213243 | dmr | 4 | 0.329623  | TANC2:intron, MIR548W:intron |
| chr17 | 62487030 | 62487031 | dmr | 1 | 0.3       | POLG2:CDS:4                  |
| chr17 | 62646187 | 62646241 | dmr | 1 | 0.291903  | SMURF2:intron                |

|       |          |          |     |   |          |                  |
|-------|----------|----------|-----|---|----------|------------------|
| chr17 | 66937388 | 66937547 | dmr | 2 | 0.268982 | ABCA8:intron     |
| chr17 | 67121612 | 67121613 | dmr | 1 | 0.268519 | ABCA6:intron     |
| chr17 | 78596834 | 78596996 | dmr | 2 | 0.264629 | RPTOR:intron     |
| chr17 | 80049289 | 80049589 | dmr | 3 | 0.531924 | FASN:CDS:8       |
| chr17 | 80970789 | 80971075 | dmr | 1 | 0.375652 | B3GNTL1:intron   |
| chr18 | 2666910  | 2667090  | dmr | 3 | 0.212565 | SMCHD1:CDS:3     |
| chr18 | 2931672  | 2931689  | dmr | 2 | 0.252747 | LPIN2:intron     |
| chr18 | 9820956  | 9821104  | dmr | 3 | 0.451215 | RAB31:intron     |
| chr18 | 10918580 | 10918729 | dmr | 2 | 0.366924 | PIEZO2:intron    |
| chr18 | 12697276 | 12697281 | dmr | 1 | 0.238095 | CEP76:CDS:5      |
| chr18 | 13575768 | 13575777 | dmr | 1 | 0.341837 | C18orf1:intron   |
| chr18 | 18549466 | 18549548 | dmr | 3 | 0.302001 | ROCK1:intron     |
| chr18 | 19141158 | 19141159 | dmr | 1 | 0.26412  | ESCO1:intron     |
| chr18 | 19371366 | 19371418 | dmr | 1 | 0.247527 | MIB1:CDS:7       |
| chr18 | 25614083 | 25614254 | dmr | 2 | 0.308333 | CDH2:intron      |
| chr18 | 30529031 | 30529173 | dmr | 2 | 0.356758 | C18orf34:intron  |
| chr18 | 31259947 | 31260172 | dmr | 3 | 0.35537  | ASXL3:intron     |
| chr18 | 34343163 | 34343507 | dmr | 3 | 0.385086 | FHOD3:intron     |
| chr18 | 37268347 | 37268406 | dmr | 2 | 0.365495 | LOC647946:intron |
| chr18 | 46210961 | 46210962 | dmr | 1 | 0.314286 | CTIF:intron      |
| chr18 | 46749226 | 46749409 | dmr | 3 | 0.284143 | DYM:intron       |
| chr18 | 46785913 | 46785914 | dmr | 1 | 0.290143 | DYM:intron       |
| chr18 | 46953097 | 46953098 | dmr | 1 | 0.5      | DYM:intron       |
| chr18 | 54539731 | 54539732 | dmr | 1 | 0.333333 | WDR7:intron      |

|       |          |          |     |   |           |                              |
|-------|----------|----------|-----|---|-----------|------------------------------|
| chr18 | 59892807 | 59892808 | dmr | 1 | 0.318083  | KIAA1468:intron              |
| chr18 | 59933525 | 59933558 | dmr | 2 | 0.415932  | KIAA1468:intron              |
| chr18 | 60597400 | 60597401 | dmr | 1 | 0.377358  | PHLPP1:intron                |
| chr18 | 61594202 | 61594203 | dmr | 1 | 0.392308  | SERPINB10:intron             |
| chr18 | 65492493 | 65492494 | dmr | 1 | 0.423188  | LOC643542:intron             |
| chr18 | 65545577 | 65545604 | dmr | 2 | 0.284324  | LOC643542:intron             |
| chr18 | 66355288 | 66355289 | dmr | 1 | 0.260163  | TMX3:intron                  |
| chr18 | 66643582 | 66643783 | dmr | 2 | 0.306616  | CCDC102B:intron              |
| chr18 | 72396445 | 72396569 | dmr | 2 | 0.219655  | ZNF407:intron                |
| chr18 | 72769089 | 72769090 | dmr | 1 | 0.345644  | ZNF407:intron                |
| chr18 | 76886293 | 76886404 | dmr | 2 | 0.276335  | ATP9B:CDS:5                  |
| chr19 | 6750376  | 6750570  | dmr | 1 | -0.326923 | TRIP10:CDS:12, TRIP10:CDS:13 |
| chr19 | 21609515 | 21609623 | dmr | 3 | 0.375816  | ZNF493:3UTR                  |
| chr19 | 32959665 | 32959836 | dmr | 4 | 0.309903  | DPY19L3:CDS:15               |
| chr19 | 37129014 | 37129075 | dmr | 1 | 0.17619   | ZNF461:3UTR                  |
| chr19 | 38134546 | 38134597 | dmr | 3 | 0.329987  | ZFP30:intron                 |
| chr19 | 44515556 | 44515669 | dmr | 2 | 0.263889  | ZNF230:CDS:4                 |
| chr19 | 52510332 | 52510333 | dmr | 1 | 0.330714  | ZNF615:intron                |
| chr19 | 52547463 | 52547480 | dmr | 2 | 0.288462  | ZNF432:intron                |
| chr19 | 56921550 | 56921563 | dmr | 1 | 0.226807  | ZNF583:intron                |
| chr2  | 8909694  | 8909883  | dmr | 3 | 0.254014  | KIDINS220:intron             |
| chr2  | 8923709  | 8923861  | dmr | 2 | 0.37561   | KIDINS220:intron             |
| chr2  | 8964272  | 8964374  | dmr | 2 | 0.350183  | KIDINS220:intron             |
| chr2  | 9140846  | 9141023  | dmr | 2 | 0.311228  | MBOAT2:intron                |

|      |          |          |     |   |          |                                    |
|------|----------|----------|-----|---|----------|------------------------------------|
| chr2 | 9736436  | 9736538  | dmr | 1 | 0.265501 | YWHAQ:intron                       |
| chr2 | 15607468 | 15607502 | dmr | 3 | 0.256692 | NBAS:CDS:19                        |
| chr2 | 17871955 | 17871956 | dmr | 1 | 0.268726 | SMC6:intron                        |
| chr2 | 17872059 | 17872155 | dmr | 1 | 0.281894 | SMC6:intron                        |
| chr2 | 17897188 | 17897333 | dmr | 4 | 0.295945 | SMC6:intron                        |
| chr2 | 24919927 | 24919962 | dmr | 3 | 0.355556 | NCOA1:intron                       |
| chr2 | 36770622 | 36770772 | dmr | 2 | 0.287047 | CRIM1:intron                       |
| chr2 | 37132800 | 37132832 | dmr | 2 | 0.34232  | STRN:intron                        |
| chr2 | 37443484 | 37443485 | dmr | 1 | 0.315897 | CEBPZ:CDS:7                        |
| chr2 | 37535226 | 37535227 | dmr | 1 | 0.314286 | PRKD3:intron                       |
| chr2 | 39554216 | 39554365 | dmr | 3 | 0.236312 | MAP4K3:intron                      |
| chr2 | 39983877 | 39983913 | dmr | 1 | 0.375    | THUMPD2:intron                     |
| chr2 | 43757505 | 43757649 | dmr | 2 | 0.273587 | THADA:intron                       |
| chr2 | 43921975 | 43922115 | dmr | 3 | 0.324114 | PLEKHH2:intron                     |
| chr2 | 45806897 | 45807036 | dmr | 3 | 0.338579 | SRBD1:CDS:6                        |
| chr2 | 48764369 | 48764370 | dmr | 1 | 0.290323 | STON1:intron, STON1-GTF2A1L:intron |
| chr2 | 54130971 | 54131093 | dmr | 3 | 0.320683 | PSME4:intron                       |
| chr2 | 54504206 | 54504207 | dmr | 1 | 0.236842 | ACYP2:intron                       |
| chr2 | 54807105 | 54807286 | dmr | 1 | 0.379682 | SPTBN1:intron                      |
| chr2 | 55867765 | 55867798 | dmr | 1 | 0.325955 | PNPT1:CDS:26                       |
| chr2 | 55875342 | 55875533 | dmr | 2 | 0.360152 | PNPT1:intron                       |
| chr2 | 58391841 | 58392028 | dmr | 3 | 0.280899 | FANCL:intron                       |
| chr2 | 61147182 | 61147243 | dmr | 1 | 0.315579 | REL:CDS:8                          |
| chr2 | 61505486 | 61505705 | dmr | 4 | 0.267994 | USP34:CDS:40                       |

|      |           |           |     |   |           |                            |
|------|-----------|-----------|-----|---|-----------|----------------------------|
| chr2 | 61516421  | 61516448  | dmr | 2 | 0.36314   | USP34:intron               |
| chr2 | 63191092  | 63191158  | dmr | 2 | 0.267716  | EHBP1:intron               |
| chr2 | 63713058  | 63713236  | dmr | 2 | 0.392983  | WDPCP:intron               |
| chr2 | 64805466  | 64805467  | dmr | 1 | 0.241379  | AFTPH:intron               |
| chr2 | 65564899  | 65565078  | dmr | 2 | 0.369149  | SPRED2:intron              |
| chr2 | 69279185  | 69279186  | dmr | 1 | 0.279762  | ANTXR1:intron              |
| chr2 | 69601202  | 69601212  | dmr | 2 | 0.246863  | GFPT1:CDS:2                |
| chr2 | 71645944  | 71646151  | dmr | 2 | 0.32322   | ZNF638:intron              |
| chr2 | 88124816  | 88124926  | dmr | 1 | -0.465789 | RGPD2:intron, RGPD1:intron |
| chr2 | 95537491  | 95537568  | dmr | 2 | -0.675    | TEKT4:CDS:1                |
| chr2 | 99938152  | 99938240  | dmr | 3 | 0.295597  | TXNDC9:intron              |
| chr2 | 100415149 | 100415255 | dmr | 2 | 0.331309  | AFF3:intron                |
| chr2 | 112874967 | 112874968 | dmr | 1 | 0.301136  | TMEM87B:3UTR               |
| chr2 | 113057458 | 113057592 | dmr | 1 | 0.330224  | ZC3H6:CDS:2                |
| chr2 | 120706432 | 120706433 | dmr | 1 | 0.404558  | PTPN4:intron               |
| chr2 | 130691712 | 130691977 | dmr | 1 | -0.349752 | LOC389033:ncexon:1         |
| chr2 | 135896641 | 135896642 | dmr | 1 | 0.333333  | RAB3GAP1:intron            |
| chr2 | 136346533 | 136346634 | dmr | 3 | 0.317909  | R3HDM1:intron              |
| chr2 | 141898954 | 141898955 | dmr | 1 | 0.4375    | LRP1B:intron               |
| chr2 | 142604201 | 142604472 | dmr | 5 | 0.350689  | LRP1B:intron               |
| chr2 | 143986662 | 143986663 | dmr | 1 | 0.277778  | ARHGAP15:intron            |
| chr2 | 144213247 | 144213248 | dmr | 1 | 0.280357  | ARHGAP15:intron            |
| chr2 | 144911451 | 144911452 | dmr | 1 | 0.356522  | GTDC1:intron               |
| chr2 | 144934884 | 144935072 | dmr | 3 | 0.262677  | GTDC1:intron               |

|      |           |           |     |   |          |                      |
|------|-----------|-----------|-----|---|----------|----------------------|
| chr2 | 145243871 | 145244019 | dmr | 3 | 0.33312  | ZEB2:intron          |
| chr2 | 145786242 | 145786339 | dmr | 4 | 0.474321 | DKFZp68601327:intron |
| chr2 | 152298181 | 152298383 | dmr | 2 | 0.319332 | RIF1:intron          |
| chr2 | 152324697 | 152324698 | dmr | 1 | 0.307692 | RIF1:intron          |
| chr2 | 153213563 | 153213864 | dmr | 4 | 0.335858 | FMNL2:intron         |
| chr2 | 160382850 | 160382993 | dmr | 3 | 0.324514 | BAZ2B:intron         |
| chr2 | 160461463 | 160461466 | dmr | 2 | 0.818182 | BAZ2B:intron         |
| chr2 | 160602628 | 160602724 | dmr | 3 | 0.293693 | MARCH7:intron        |
| chr2 | 161346174 | 161346233 | dmr | 2 | 0.266674 | RBMS1:intron         |
| chr2 | 162055495 | 162055681 | dmr | 2 | 0.303797 | TANK:intron          |
| chr2 | 162186211 | 162186299 | dmr | 1 | 0.265537 | PSMD14:intron        |
| chr2 | 165798320 | 165798321 | dmr | 1 | 0.4      | SLC38A11:intron      |
| chr2 | 167277612 | 167277925 | dmr | 3 | 0.341881 | SCN7A:CDS:18         |
| chr2 | 169732592 | 169732593 | dmr | 1 | 0.403251 | SPC25:CDS:4          |
| chr2 | 169739665 | 169739666 | dmr | 1 | 0.266667 | SPC25:intron         |
| chr2 | 172300377 | 172300378 | dmr | 1 | 0.352087 | DCAF17:intron        |
| chr2 | 172582737 | 172582825 | dmr | 2 | 0.289986 | DYNC1I2:CDS:9        |
| chr2 | 172848233 | 172848249 | dmr | 2 | 0.31098  | HAT1:CDS:11          |
| chr2 | 175963638 | 175963639 | dmr | 1 | 0.357143 | ATF2:intron          |
| chr2 | 177141686 | 177141828 | dmr | 2 | 0.22861  | MTX2:intron          |
| chr2 | 180047699 | 180047900 | dmr | 3 | 0.39913  | SESTD1:CDS:2         |
| chr2 | 180819082 | 180819083 | dmr | 1 | 0.317587 | CWC22:CDS:15         |
| chr2 | 180850277 | 180850449 | dmr | 4 | 0.329339 | CWC22:intron         |
| chr2 | 183834246 | 183834247 | dmr | 1 | 0.275862 | NCKAP1:intron        |



|      |           |           |     |   |          |                              |
|------|-----------|-----------|-----|---|----------|------------------------------|
| chr2 | 183849961 | 183849962 | dmr | 1 | 0.351351 | NCKAP1:intron                |
| chr2 | 183866180 | 183866344 | dmr | 3 | 0.396748 | NCKAP1:intron                |
| chr2 | 184026167 | 184026354 | dmr | 3 | 0.277911 | NUP35:3UTR                   |
| chr2 | 188226621 | 188226622 | dmr | 1 | 0.28734  | CALCRL:intron                |
| chr2 | 188331910 | 188331980 | dmr | 2 | 0.317545 | TFPI:intron                  |
| chr2 | 189453937 | 189454069 | dmr | 2 | 0.342694 | GULP1:intron                 |
| chr2 | 191535067 | 191535068 | dmr | 1 | 0.279915 | NAB1:CDS:2                   |
| chr2 | 192930995 | 192930996 | dmr | 1 | 0.321059 | TMEFF2:intron                |
| chr2 | 192944552 | 192944703 | dmr | 2 | 0.346667 | TMEFF2:intron                |
| chr2 | 196889798 | 196889799 | dmr | 1 | 0.392857 | DNAH7:intron                 |
| chr2 | 197021423 | 197021424 | dmr | 1 | 0.514286 | STK17B:intron                |
| chr2 | 197431051 | 197431075 | dmr | 2 | 0.32815  | HECW2:intron                 |
| chr2 | 197700593 | 197700787 | dmr | 3 | 0.292079 | PGAP1:3UTR                   |
| chr2 | 197782184 | 197782287 | dmr | 1 | 0.362772 | PGAP1:intron                 |
| chr2 | 198414864 | 198415087 | dmr | 3 | 0.251793 | HSPE1-MOB4:CDS:8, MOB4:CDS:6 |
| chr2 | 198694056 | 198694189 | dmr | 3 | 0.298916 | PLCL1:intron                 |
| chr2 | 202326941 | 202327073 | dmr | 2 | 0.322186 | STRADB:intron                |
| chr2 | 203408416 | 203408503 | dmr | 2 | 0.311201 | BMP2:intron                  |
| chr2 | 203557346 | 203557422 | dmr | 3 | 0.326598 | FAM117B:intron               |
| chr2 | 203959274 | 203959275 | dmr | 1 | 0.245736 | NBEAL1:intron                |
| chr2 | 205561476 | 205561477 | dmr | 1 | 0.360256 | PARD3B:intron                |
| chr2 | 205722724 | 205722725 | dmr | 1 | 0.305897 | PARD3B:intron                |
| chr2 | 206002058 | 206002071 | dmr | 1 | 0.456017 | PARD3B:intron                |
| chr2 | 209116356 | 209116377 | dmr | 1 | 0.272683 | IDH1:promoter                |

|       |           |           |     |   |           |                  |
|-------|-----------|-----------|-----|---|-----------|------------------|
| chr2  | 212500468 | 212500469 | dmr | 1 | 0.249474  | ERBB4:intron     |
| chr2  | 212507647 | 212507648 | dmr | 1 | 0.464286  | ERBB4:intron     |
| chr2  | 212995404 | 212995459 | dmr | 1 | 0.311912  | ERBB4:intron     |
| chr2  | 213137374 | 213137476 | dmr | 2 | 0.375213  | ERBB4:intron     |
| chr2  | 213894812 | 213894813 | dmr | 1 | 0.354167  | IKZF2:intron     |
| chr2  | 215627285 | 215627501 | dmr | 4 | 0.252005  | BARD1:intron     |
| chr2  | 216281791 | 216281792 | dmr | 1 | 0.37538   | FN1:intron       |
| chr2  | 216620670 | 216620680 | dmr | 2 | -0.452588 | LOC646324:intron |
| chr2  | 216623263 | 216623353 | dmr | 3 | 0.320513  | LOC646324:intron |
| chr2  | 223787634 | 223787641 | dmr | 2 | 0.26238   | ACSL3:intron     |
| chr2  | 225370765 | 225370822 | dmr | 3 | 0.305789  | CUL3:CDS:8       |
| chr2  | 228403780 | 228403795 | dmr | 1 | 0.301075  | AGFG1:intron     |
| chr2  | 228748774 | 228748860 | dmr | 3 | 0.383228  | WDR69:intron     |
| chr2  | 232003429 | 232003623 | dmr | 4 | 0.276859  | PSMD1:CDS:17     |
| chr2  | 234420907 | 234420997 | dmr | 3 | 0.302108  | USP40:intron     |
| chr2  | 242035423 | 242035523 | dmr | 3 | 0.266148  | MTERFD2:CDS:4    |
| chr20 | 13605010  | 13605180  | dmr | 3 | 0.403873  | TASP1:intron     |
| chr20 | 13752050  | 13752051  | dmr | 1 | 0.343544  | ESF1:CDS:5       |
| chr20 | 14217176  | 14217274  | dmr | 1 | 0.257843  | MACROD2:intron   |
| chr20 | 14472009  | 14472142  | dmr | 3 | 0.304984  | MACROD2:intron   |
| chr20 | 14473552  | 14473751  | dmr | 3 | 0.377387  | MACROD2:intron   |
| chr20 | 17535346  | 17535471  | dmr | 2 | 0.375     | BFSP1:intron     |
| chr20 | 35696397  | 35696524  | dmr | 3 | 0.312362  | RBL1:CDS:3       |
| chr20 | 51601752  | 51601772  | dmr | 1 | 0.274704  | TSHZ2:intron     |

|       |          |          |     |   |           |                               |
|-------|----------|----------|-----|---|-----------|-------------------------------|
| chr20 | 57608516 | 57608660 | dmr | 3 | 0.293738  | SLMO2:3UTR                    |
| chr21 | 17891029 | 17891077 | dmr | 3 | 0.345333  | LINC00478:intron              |
| chr21 | 18965928 | 18966132 | dmr | 3 | 0.241366  | BTG3:3UTR                     |
| chr21 | 26326414 | 26326415 | dmr | 1 | 0.326491  | LOC339622:intron              |
| chr21 | 33647015 | 33647159 | dmr | 2 | 0.279289  | MIS18A:CDS:2                  |
| chr21 | 34060657 | 34060781 | dmr | 2 | 0.225589  | SYNJ1:CDS:6                   |
| chr21 | 37747450 | 37747525 | dmr | 3 | 0.264515  | MORC3:CDS:17                  |
| chr21 | 38327884 | 38328077 | dmr | 3 | 0.332593  | HLCS:intron                   |
| chr21 | 38802141 | 38802180 | dmr | 1 | 0.329992  | DYRK1A:intron                 |
| chr21 | 40636016 | 40636189 | dmr | 3 | 0.269446  | BRWD1:intron                  |
| chr21 | 44445955 | 44445978 | dmr | 3 | -0.513333 | PKNOX1:intron                 |
| chr21 | 47702232 | 47702262 | dmr | 3 | 0.317614  | MCM3AP:intron                 |
| chr22 | 19496615 | 19496616 | dmr | 1 | 0.338889  | CDC45:intron                  |
| chr22 | 21129710 | 21129788 | dmr | 2 | 0.352691  | SERPIND1:intron, PI4KA:intron |
| chr22 | 24747438 | 24747610 | dmr | 1 | 0.266724  | SPECC1L:intron                |
| chr22 | 28883565 | 28883589 | dmr | 1 | 0.304668  | TTC28:intron                  |
| chr22 | 31861844 | 31861856 | dmr | 2 | 0.30137   | EIF4ENIF1:intron              |
| chr22 | 36194964 | 36195060 | dmr | 2 | 0.341605  | RBFOX2:intron                 |
| chr22 | 36272595 | 36272596 | dmr | 1 | 0.3875    | RBFOX2:intron                 |
| chr22 | 40505773 | 40505935 | dmr | 2 | 0.232288  | TNRC6B:intron                 |
| chr22 | 42042666 | 42042681 | dmr | 2 | 0.232877  | XRCC6:intron                  |
| chr22 | 46081479 | 46081480 | dmr | 1 | 0.375     | ATXN10:intron                 |
| chr3  | 4882398  | 4882399  | dmr | 1 | 0.3875    | ITPR1:intron                  |
| chr3  | 17423791 | 17424028 | dmr | 4 | 0.326514  | TBC1D5:intron                 |

|      |          |          |     |   |          |                |
|------|----------|----------|-----|---|----------|----------------|
| chr3 | 17469544 | 17469599 | dmr | 2 | 0.359617 | TBC1D5:intron  |
| chr3 | 17553506 | 17553573 | dmr | 2 | 0.317988 | TBC1D5:intron  |
| chr3 | 20144617 | 20144809 | dmr | 3 | 0.280486 | KAT2B:intron   |
| chr3 | 23246805 | 23246806 | dmr | 1 | 0.41133  | UBE2E2:intron  |
| chr3 | 29393691 | 29393692 | dmr | 1 | 0.428571 | RBMS3:intron   |
| chr3 | 29554149 | 29554179 | dmr | 3 | 0.552756 | RBMS3:intron   |
| chr3 | 32802232 | 32802233 | dmr | 1 | 0.428571 | CNOT10:intron  |
| chr3 | 33668489 | 33668490 | dmr | 1 | 0.291925 | CLASP2:CDS:4   |
| chr3 | 37053759 | 37053760 | dmr | 1 | 0.264706 | MLH1:intron    |
| chr3 | 37139759 | 37139816 | dmr | 2 | 0.31875  | LRRFIP2:intron |
| chr3 | 37160851 | 37160852 | dmr | 1 | 0.338095 | LRRFIP2:intron |
| chr3 | 38217877 | 38217982 | dmr | 2 | 0.318942 | OXSRI:intron   |
| chr3 | 42667982 | 42668155 | dmr | 3 | 0.318434 | NKTR:intron    |
| chr3 | 43451624 | 43451818 | dmr | 2 | 0.260831 | ANO10:intron   |
| chr3 | 44830760 | 44830841 | dmr | 1 | 0.27399  | KIF15:intron   |
| chr3 | 45750317 | 45750318 | dmr | 1 | 0.37688  | SACM1L:intron  |
| chr3 | 56711000 | 56711201 | dmr | 3 | 0.264151 | FAM208A:intron |
| chr3 | 56911221 | 56911222 | dmr | 1 | 0.316176 | ARHGEF3:intron |
| chr3 | 57819936 | 57820106 | dmr | 3 | 0.382313 | SLMAP:intron   |
| chr3 | 58848398 | 58848551 | dmr | 2 | 0.260236 | C3orf67:intron |
| chr3 | 65632353 | 65632536 | dmr | 3 | 0.331381 | MAGI1:intron   |
| chr3 | 65937091 | 65937351 | dmr | 4 | 0.270136 | MAGI1:intron   |
| chr3 | 67672850 | 67672992 | dmr | 3 | 0.327689 | SUCLG2:intron  |
| chr3 | 71604813 | 71604970 | dmr | 2 | 0.24607  | FOXP1:intron   |

|      |           |           |     |   |          |                                  |
|------|-----------|-----------|-----|---|----------|----------------------------------|
| chr3 | 78838611  | 78838612  | dmr | 1 | 0.293844 | ROB01:intron                     |
| chr3 | 78914048  | 78914116  | dmr | 2 | 0.334122 | ROB01:intron                     |
| chr3 | 81696009  | 81696010  | dmr | 1 | 0.279167 | GBE1:intron                      |
| chr3 | 93729878  | 93729909  | dmr | 1 | 0.249714 | ARL13B:intron                    |
| chr3 | 100012762 | 100012763 | dmr | 1 | 0.266667 | TBC1D23:intron                   |
| chr3 | 100468783 | 100468784 | dmr | 1 | 0.368421 | ABI3BP:3UTR                      |
| chr3 | 102169756 | 102169888 | dmr | 4 | 0.310904 | ZPLD1:intron                     |
| chr3 | 105394087 | 105394097 | dmr | 2 | 0.340909 | CBLB:intron                      |
| chr3 | 105417607 | 105417608 | dmr | 1 | 0.355349 | CBLB:intron                      |
| chr3 | 106965727 | 106965897 | dmr | 3 | 0.201401 | LOC344595:ncexon:2               |
| chr3 | 112297673 | 112297674 | dmr | 1 | 0.342742 | SLC35A5:intron                   |
| chr3 | 114363922 | 114364038 | dmr | 2 | 0.266601 | ZBTB20:intron                    |
| chr3 | 114551479 | 114551655 | dmr | 2 | 0.25875  | ZBTB20:intron                    |
| chr3 | 114664084 | 114664099 | dmr | 2 | 0.30625  | ZBTB20:intron                    |
| chr3 | 114848212 | 114848267 | dmr | 2 | 0.311151 | ZBTB20:intron                    |
| chr3 | 121460237 | 121460377 | dmr | 3 | 0.343067 | GOLGB1:intron                    |
| chr3 | 121521022 | 121521023 | dmr | 1 | 0.519841 | IQCB1:intron                     |
| chr3 | 121526647 | 121526648 | dmr | 1 | 0.255051 | IQCB1:intron                     |
| chr3 | 123658632 | 123658691 | dmr | 2 | 0.409091 | CCDC14:intron                    |
| chr3 | 126561907 | 126562089 | dmr | 3 | 0.290339 | CHCHD6:intron                    |
| chr3 | 126644852 | 126644922 | dmr | 4 | -0.42213 | CHCHD6:intron                    |
| chr3 | 131060130 | 131060131 | dmr | 1 | 0.348291 | NEK11:intron, LOC339874:intron   |
| chr3 | 132232861 | 132232951 | dmr | 3 | 0.323822 | DNAJC13:intron                   |
| chr3 | 132395032 | 132395054 | dmr | 3 | 0.252095 | UBA5:intron, NPHP3-ACAD11:intron |

|      |           |           |     |   |           |                           |
|------|-----------|-----------|-----|---|-----------|---------------------------|
| chr3 | 135709329 | 135709513 | dmr | 1 | 0.244364  | PPP2R3A:intron            |
| chr3 | 137890479 | 137890607 | dmr | 2 | 0.304853  | DBR1:CDS:3                |
| chr3 | 137958483 | 137958484 | dmr | 1 | 0.285714  | ARMC8:intron              |
| chr3 | 137997494 | 137997678 | dmr | 1 | 0.32776   | ARMC8:intron, NME9:intron |
| chr3 | 141925042 | 141925195 | dmr | 3 | 0.27395   | GK5:intron                |
| chr3 | 143221440 | 143221589 | dmr | 3 | 0.253822  | SLC9A9:intron             |
| chr3 | 145910167 | 145910540 | dmr | 4 | 0.29794   | PLSCR4:3UTR               |
| chr3 | 146174872 | 146174898 | dmr | 1 | 0.375834  | PLSCR2:intron             |
| chr3 | 148907683 | 148907684 | dmr | 1 | 0.285714  | CP:intron                 |
| chr3 | 153871929 | 153871930 | dmr | 1 | 0.310345  | ARHGEF26:intron           |
| chr3 | 155493557 | 155493614 | dmr | 3 | 0.285038  | C3orf33:CDS:2             |
| chr3 | 160141068 | 160141226 | dmr | 2 | 0.0362903 | SMC4:CDS:13               |
| chr3 | 165510102 | 165510248 | dmr | 3 | 0.304623  | BCHE:intron               |
| chr3 | 170608643 | 170608644 | dmr | 1 | 0.317532  | EIF5A2:3UTR               |
| chr3 | 171340771 | 171340772 | dmr | 1 | 0.404255  | PLD1:intron               |
| chr3 | 172477701 | 172477831 | dmr | 1 | 0.333218  | ECT2:intron               |
| chr3 | 174699290 | 174699452 | dmr | 4 | 0.207101  | NAALADL2:intron           |
| chr3 | 182599590 | 182599629 | dmr | 1 | 0.240698  | ATP11B:intron             |
| chr3 | 184547647 | 184547648 | dmr | 1 | 0.305556  | VPS8:intron               |
| chr3 | 185873797 | 185873889 | dmr | 2 | 0.36936   | DGKG:intron               |
| chr3 | 188030045 | 188030091 | dmr | 3 | 0.358278  | LPP:intron                |
| chr3 | 190347524 | 190347525 | dmr | 1 | 0.264706  | IL1RAP:3UTR               |
| chr3 | 193353070 | 193353231 | dmr | 2 | 0.324652  | OPA1:CDS:9                |
| chr3 | 194918410 | 194918443 | dmr | 2 | 0.314611  | XXYL1:intron              |

|      |           |           |     |   |          |                 |
|------|-----------|-----------|-----|---|----------|-----------------|
| chr3 | 195244481 | 195244677 | dmr | 1 | 0.286806 | PPP1R2:intron   |
| chr3 | 196826402 | 196826439 | dmr | 1 | 0.291157 | DLG1:intron     |
| chr3 | 196882959 | 196882964 | dmr | 2 | 0.286453 | DLG1:intron     |
| chr4 | 17892241  | 17892389  | dmr | 3 | 0.297529 | LCORL:intron    |
| chr4 | 17971019  | 17971347  | dmr | 3 | 0.301264 | LCORL:intron    |
| chr4 | 20738115  | 20738116  | dmr | 1 | 0.243902 | KCNIP4:intron   |
| chr4 | 41091897  | 41091976  | dmr | 3 | 0.274238 | APBB2:intron    |
| chr4 | 48645832  | 48645833  | dmr | 1 | 0.270588 | FRYL:intron     |
| chr4 | 54324883  | 54325020  | dmr | 3 | 0.282484 | FIP1L1:CDS:17   |
| chr4 | 56359608  | 56359609  | dmr | 1 | 0.305556 | CLOCK:intron    |
| chr4 | 56878013  | 56878071  | dmr | 2 | 0.321818 | CEP135:CDS:20   |
| chr4 | 62514932  | 62514933  | dmr | 1 | 0.31116  | LPHN3:intron    |
| chr4 | 65195407  | 65195408  | dmr | 1 | 0.372954 | TECRL:intron    |
| chr4 | 66248107  | 66248247  | dmr | 2 | 0.311223 | EPHA5:intron    |
| chr4 | 68338612  | 68338645  | dmr | 1 | 0.304091 | CENPC1:intron   |
| chr4 | 73233895  | 73233896  | dmr | 1 | 0.267677 | ADAMTS3:intron  |
| chr4 | 75399406  | 75399595  | dmr | 3 | 0.312715 | AREG:intron     |
| chr4 | 77272830  | 77272925  | dmr | 2 | 0.327922 | CCDC158:CDS:15  |
| chr4 | 78793133  | 78793134  | dmr | 1 | 0.307692 | MRPL1:intron    |
| chr4 | 79747782  | 79747853  | dmr | 3 | 0.30581  | BMP2K:intron    |
| chr4 | 85736944  | 85737105  | dmr | 2 | 0.272469 | WDFY3:intron    |
| chr4 | 86552572  | 86552573  | dmr | 1 | 0.352196 | ARHGAP24:intron |
| chr4 | 86802539  | 86802540  | dmr | 1 | 0.407407 | ARHGAP24:intron |
| chr4 | 86911192  | 86911237  | dmr | 2 | 0.321723 | ARHGAP24:intron |

|      |           |           |     |   |          |                              |
|------|-----------|-----------|-----|---|----------|------------------------------|
| chr4 | 95197500  | 95197521  | dmr | 1 | 0.249825 | SMARCAD1:CDS:6               |
| chr4 | 95197816  | 95198012  | dmr | 4 | 0.288182 | SMARCAD1:intron              |
| chr4 | 95507574  | 95507691  | dmr | 2 | 0.30875  | PDLIM5:promoter              |
| chr4 | 95507574  | 95507691  | dmr | 2 | 0.30875  | PDLIM5:promoter, PDLIM5:5UTR |
| chr4 | 99287020  | 99287021  | dmr | 1 | 0.382979 | RAP1GDS1:intron              |
| chr4 | 99358002  | 99358061  | dmr | 3 | 0.320136 | RAP1GDS1:intron              |
| chr4 | 102042521 | 102042722 | dmr | 2 | 0.390476 | PPP3CA:intron                |
| chr4 | 102231053 | 102231205 | dmr | 2 | 0.247537 | PPP3CA:intron                |
| chr4 | 102932666 | 102932669 | dmr | 1 | 0.214147 | BANK1:intron                 |
| chr4 | 103575515 | 103575666 | dmr | 3 | 0.250198 | MANBA:intron                 |
| chr4 | 104035266 | 104035440 | dmr | 3 | 0.303905 | CENPE:intron                 |
| chr4 | 104051320 | 104051502 | dmr | 3 | 0.27551  | CENPE:intron                 |
| chr4 | 106291745 | 106291853 | dmr | 3 | 0.283688 | PPA2:intron                  |
| chr4 | 107115819 | 107115874 | dmr | 3 | 0.3      | TBCK:intron                  |
| chr4 | 109853638 | 109853639 | dmr | 1 | 0.268293 | COL25A1:intron               |
| chr4 | 110459351 | 110459352 | dmr | 1 | 0.414035 | SEC24B:intron                |
| chr4 | 110486966 | 110486967 | dmr | 1 | 0.315789 | CCDC109B:intron              |
| chr4 | 113187729 | 113187832 | dmr | 1 | 0.238884 | AP1AR:CDS:8                  |
| chr4 | 113945014 | 113945015 | dmr | 1 | 0.178571 | ANK2:intron                  |
| chr4 | 114645152 | 114645458 | dmr | 3 | 0.289216 | CAMK2D:intron                |
| chr4 | 114646147 | 114646183 | dmr | 3 | 0.260195 | CAMK2D:intron                |
| chr4 | 119837095 | 119837096 | dmr | 1 | 0.363354 | SYNPO2:intron                |
| chr4 | 120138023 | 120138024 | dmr | 1 | 0.222567 | USP53:promoter               |
| chr4 | 120509884 | 120510022 | dmr | 3 | 0.325459 | PDE5A:intron                 |



|      |           |           |     |   |          |                  |
|------|-----------|-----------|-----|---|----------|------------------|
| chr4 | 123226316 | 123226317 | dmr | 1 | 0.392157 | KIAA1109:intron  |
| chr4 | 124797138 | 124797174 | dmr | 2 | 0.292237 | LOC285419:intron |
| chr4 | 128753347 | 128753522 | dmr | 2 | 0.317526 | HSPA4L:intron    |
| chr4 | 129028764 | 129028863 | dmr | 2 | 0.352941 | LARP1B:3UTR      |
| chr4 | 130028089 | 130028161 | dmr | 3 | 0.375458 | C4orf33:intron   |
| chr4 | 143763003 | 143763148 | dmr | 2 | 0.362804 | INPP4B:intron    |
| chr4 | 146790758 | 146790759 | dmr | 1 | 0.241881 | ZNF827:intron    |
| chr4 | 147346497 | 147346498 | dmr | 1 | 0.348837 | SLC10A7:intron   |
| chr4 | 151214298 | 151214443 | dmr | 3 | 0.401786 | LRBA:intron      |
| chr4 | 151287094 | 151287147 | dmr | 3 | 0.387996 | LRBA:intron      |
| chr4 | 151461049 | 151461098 | dmr | 2 | 0.273793 | LRBA:intron      |
| chr4 | 151622624 | 151622734 | dmr | 2 | 0.424908 | LRBA:intron      |
| chr4 | 151684624 | 151684625 | dmr | 1 | 0.333333 | LRBA:intron      |
| chr4 | 153271060 | 153271242 | dmr | 3 | 0.328231 | FBXW7:CDS:2      |
| chr4 | 153447728 | 153447769 | dmr | 1 | 0.244582 | FBXW7:intron     |
| chr4 | 155459285 | 155459389 | dmr | 2 | 0.297297 | PLRG1:intron     |
| chr4 | 156719475 | 156719670 | dmr | 2 | 0.281922 | GUCY1B3:intron   |
| chr4 | 156836526 | 156836527 | dmr | 1 | 0.444894 | TD02:intron      |
| chr4 | 164452563 | 164452722 | dmr | 2 | 0.192395 | MARCH1:intron    |
| chr4 | 165131293 | 165131399 | dmr | 2 | 0.349008 | MARCH1:intron    |
| chr4 | 166239040 | 166239187 | dmr | 2 | 0.26186  | KLHL2:CDS:14     |
| chr4 | 169912856 | 169913011 | dmr | 2 | 0.458889 | CBR4:intron      |
| chr4 | 173238459 | 173238574 | dmr | 4 | 0.268073 | GALNTL6:intron   |
| chr4 | 175162241 | 175162242 | dmr | 1 | 0.416923 | FBX08:intron     |

|      |           |           |     |   |          |               |
|------|-----------|-----------|-----|---|----------|---------------|
| chr4 | 175575051 | 175575052 | dmr | 1 | 0.390476 | GLRA3:intron  |
| chr4 | 177038584 | 177038624 | dmr | 3 | 0.296225 | WDR17:intron  |
| chr4 | 177632923 | 177632931 | dmr | 1 | 0.234673 | VEGFC:intron  |
| chr4 | 183275849 | 183275995 | dmr | 4 | 0.282988 | ODZ3:intron   |
| chr4 | 183386868 | 183386869 | dmr | 1 | 0.342017 | ODZ3:intron   |
| chr4 | 185649904 | 185649905 | dmr | 1 | 0.25     | MLF1IP:intron |
| chr4 | 186454947 | 186455000 | dmr | 2 | 0.377083 | PDLIM3:intron |
| chr4 | 187560903 | 187560921 | dmr | 1 | 0.229508 | FAT1:CDS:3    |
| chr5 | 365313    | 365514    | dmr | 3 | 0.309091 | AHRR:intron   |
| chr5 | 7890784   | 7890785   | dmr | 1 | 0.279167 | MTRR:intron   |
| chr5 | 19489739  | 19489745  | dmr | 1 | 0.351852 | CDH18:intron  |
| chr5 | 31410265  | 31410426  | dmr | 2 | 0.281378 | DROSHA:intron |
| chr5 | 34708690  | 34708691  | dmr | 1 | 0.214286 | RAI14:intron  |
| chr5 | 34841264  | 34841401  | dmr | 3 | 0.289247 | TTC23L:intron |
| chr5 | 37017890  | 37017891  | dmr | 1 | 0.350739 | NIPBL:intron  |
| chr5 | 37303391  | 37303482  | dmr | 5 | 0.330597 | NUP155:CDS:28 |
| chr5 | 37584328  | 37584480  | dmr | 3 | 0.253874 | WDR70:intron  |
| chr5 | 37701490  | 37701491  | dmr | 1 | 0.333333 | WDR70:intron  |
| chr5 | 38968287  | 38968295  | dmr | 1 | 0.173701 | RICTOR:intron |
| chr5 | 39110318  | 39110495  | dmr | 3 | 0.293384 | FYB:CDS:16    |
| chr5 | 44812094  | 44812255  | dmr | 4 | 0.243594 | MRPS30:CDS:3  |
| chr5 | 52374440  | 52374634  | dmr | 2 | 0.288889 | ITGA2:CDS:24  |
| chr5 | 54447446  | 54447500  | dmr | 1 | 0.236899 | CDC20B:intron |
| chr5 | 56559382  | 56559564  | dmr | 2 | 0.304676 | GPBP1:3UTR    |

|      |          |          |     |   |          |                 |
|------|----------|----------|-----|---|----------|-----------------|
| chr5 | 59776180 | 59776226 | dmr | 3 | 0.311258 | PDE4D:intron    |
| chr5 | 60422325 | 60422456 | dmr | 2 | 0.258732 | NDUFAB2:intron  |
| chr5 | 61801790 | 61801791 | dmr | 1 | 0.269231 | IPO11:intron    |
| chr5 | 61873820 | 61874017 | dmr | 2 | 0.306633 | LRRC70:promoter |
| chr5 | 63824836 | 63824837 | dmr | 1 | 0.421053 | RGS7BP:intron   |
| chr5 | 64514764 | 64514960 | dmr | 3 | 0.31066  | ADAMTS6:intron  |
| chr5 | 64640729 | 64640730 | dmr | 1 | 0.275824 | ADAMTS6:intron  |
| chr5 | 65288860 | 65288952 | dmr | 2 | 0.265075 | ERBB2IP:intron  |
| chr5 | 65320323 | 65320389 | dmr | 2 | 0.348451 | ERBB2IP:intron  |
| chr5 | 65448206 | 65448334 | dmr | 1 | 0.256429 | SREK1:promoter  |
| chr5 | 66380744 | 66380830 | dmr | 3 | 0.331169 | MAST4:intron    |
| chr5 | 68414328 | 68414385 | dmr | 3 | 0.393541 | SLC30A5:CDS:12  |
| chr5 | 72149761 | 72149898 | dmr | 3 | 0.315104 | TNP01:intron    |
| chr5 | 77042515 | 77042516 | dmr | 1 | 0.275    | TBCA:intron     |
| chr5 | 77043198 | 77043328 | dmr | 3 | 0.296438 | TBCA:intron     |
| chr5 | 77045683 | 77045684 | dmr | 1 | 0.25     | TBCA:intron     |
| chr5 | 77313902 | 77314099 | dmr | 4 | 0.20945  | AP3B1:intron    |
| chr5 | 77675602 | 77675791 | dmr | 1 | 0.309608 | SCAMP1:intron   |
| chr5 | 80335711 | 80335760 | dmr | 3 | 0.362003 | RASGRF2:intron  |
| chr5 | 80600909 | 80601081 | dmr | 3 | 0.264368 | ZCCHC9:CDS:1    |
| chr5 | 81031443 | 81031644 | dmr | 3 | 0.298427 | SSBP2:intron    |
| chr5 | 82870875 | 82870876 | dmr | 1 | 0.343137 | VCAN:intron     |
| chr5 | 83378764 | 83378819 | dmr | 3 | 0.290337 | EDIL3:intron    |
| chr5 | 87519992 | 87519993 | dmr | 1 | 0.3125   | TMEM161B:intron |

|      |           |           |     |   |          |                |
|------|-----------|-----------|-----|---|----------|----------------|
| chr5 | 88165684  | 88165802  | dmr | 3 | 0.358453 | MEF2C:intron   |
| chr5 | 89910457  | 89910458  | dmr | 1 | 0.377778 | GPR98:intron   |
| chr5 | 90256209  | 90256237  | dmr | 2 | 0.260141 | GPR98:intron   |
| chr5 | 93311558  | 93311713  | dmr | 1 | 0.227013 | FAM172A:intron |
| chr5 | 96015595  | 96015643  | dmr | 3 | 0.309973 | CAST:intron    |
| chr5 | 98223843  | 98224001  | dmr | 3 | 0.233083 | CHD1:CDS:16    |
| chr5 | 100181354 | 100181462 | dmr | 2 | 0.383574 | ST8SIA4:intron |
| chr5 | 102300572 | 102300708 | dmr | 2 | 0.347491 | PAM:intron     |
| chr5 | 102423675 | 102423809 | dmr | 4 | 0.311671 | GIN1:CDS:7     |
| chr5 | 102525530 | 102525629 | dmr | 2 | 0.252405 | PPIP5K2:intron |
| chr5 | 106937739 | 106937749 | dmr | 1 | 0.308608 | EFNA5:intron   |
| chr5 | 107252567 | 107252652 | dmr | 2 | 0.35097  | FBXL17:intron  |
| chr5 | 107652193 | 107652194 | dmr | 1 | 0.531818 | FBXL17:intron  |
| chr5 | 108087585 | 108087586 | dmr | 1 | 0.250947 | FER:intron     |
| chr5 | 108114203 | 108114204 | dmr | 1 | 0.3      | FER:intron     |
| chr5 | 108382595 | 108382783 | dmr | 2 | 0.359677 | FER:intron     |
| chr5 | 108718672 | 108718682 | dmr | 2 | 0.312985 | PJA2:intron    |
| chr5 | 110569198 | 110569257 | dmr | 3 | 0.270561 | CAMK4:intron   |
| chr5 | 111151204 | 111151405 | dmr | 3 | 0.261546 | NREP:intron    |
| chr5 | 112861702 | 112861841 | dmr | 3 | 0.34385  | YTHDC2:intron  |
| chr5 | 112901382 | 112901545 | dmr | 2 | 0.210852 | YTHDC2:intron  |
| chr5 | 112924816 | 112924918 | dmr | 2 | 0.407295 | YTHDC2:intron  |
| chr5 | 118437636 | 118437637 | dmr | 1 | 0.341615 | DMXL1:CDS:3    |
| chr5 | 118488441 | 118488442 | dmr | 1 | 0.449134 | DMXL1:intron   |

|      |           |           |     |   |          |                                       |
|------|-----------|-----------|-----|---|----------|---------------------------------------|
| chr5 | 118642792 | 118642793 | dmr | 1 | 0.277778 | TNFAIP8:intron                        |
| chr5 | 118859070 | 118859319 | dmr | 4 | 0.33504  | HSD17B4:intron                        |
| chr5 | 121309763 | 121310112 | dmr | 2 | 0.253497 | SRFBP1:CDS:2                          |
| chr5 | 122866774 | 122866969 | dmr | 3 | 0.34558  | CSNK1G3:intron                        |
| chr5 | 122931286 | 122931473 | dmr | 2 | 0.31746  | CSNK1G3:intron                        |
| chr5 | 125705096 | 125705119 | dmr | 2 | 0.364464 | GRAMD3:intron                         |
| chr5 | 127638762 | 127638934 | dmr | 3 | 0.297006 | FBN2:CDS:46                           |
| chr5 | 127850357 | 127850483 | dmr | 3 | 0.25194  | FBN2:intron                           |
| chr5 | 128878827 | 128879024 | dmr | 3 | 0.29907  | ADAMTS19:intron                       |
| chr5 | 129279117 | 129279118 | dmr | 1 | 0.327869 | CHSY3:intron                          |
| chr5 | 132578746 | 132578880 | dmr | 1 | 0.192308 | FSTL4:intron                          |
| chr5 | 134007520 | 134007521 | dmr | 1 | 0.363636 | SEC24A:CDS:4                          |
| chr5 | 134149934 | 134150117 | dmr | 3 | 0.308537 | DDX46:intron                          |
| chr5 | 134287770 | 134287800 | dmr | 1 | 0.305921 | PCBD2:intron                          |
| chr5 | 135270165 | 135270214 | dmr | 1 | 0.287582 | FBXL21:promoter                       |
| chr5 | 139884964 | 139884965 | dmr | 1 | 0.342857 | ANKHD1-EIF4EBP3:intron, ANKHD1:intron |
| chr5 | 145602516 | 145602519 | dmr | 2 | 0.315205 | RBM27:intron                          |
| chr5 | 145890839 | 145890840 | dmr | 1 | 0.359046 | TCERG1:3UTR                           |
| chr5 | 149386391 | 149386406 | dmr | 1 | 0.305621 | HMGXB3:intron                         |
| chr5 | 157077683 | 157077684 | dmr | 1 | 0.326991 | SOX30:intron                          |
| chr5 | 159832900 | 159832901 | dmr | 1 | 0.30119  | SLU7:intron                           |
| chr5 | 162918071 | 162918135 | dmr | 1 | 0.237473 | HMMR:CDS:15                           |
| chr5 | 170343135 | 170343352 | dmr | 3 | 0.256081 | RANBP17:intron                        |
| chr5 | 170597069 | 170597192 | dmr | 3 | 0.258055 | RANBP17:CDS:15                        |

|      |           |           |     |   |          |                 |
|------|-----------|-----------|-----|---|----------|-----------------|
| chr5 | 179747994 | 179748061 | dmr | 2 | 0.247917 | GFPT2:intron    |
| chr6 | 1830911   | 1831092   | dmr | 2 | 0.329787 | GMDS:intron     |
| chr6 | 2156216   | 2156217   | dmr | 1 | 0.25     | GMDS:intron     |
| chr6 | 4866335   | 4866424   | dmr | 2 | 0.233071 | CDYL:intron     |
| chr6 | 7296318   | 7296319   | dmr | 1 | 0.442958 | SSR1:intron     |
| chr6 | 7601612   | 7601720   | dmr | 3 | 0.318474 | SNRNP48:CDS:5   |
| chr6 | 8420036   | 8420066   | dmr | 2 | 0.366815 | SLC35B3:intron  |
| chr6 | 21165645  | 21165846  | dmr | 1 | 0.283391 | CDKAL1:intron   |
| chr6 | 24518776  | 24518777  | dmr | 1 | 0.35576  | ALDH5A1:intron  |
| chr6 | 43754057  | 43754276  | dmr | 2 | 0.275966 | VEGFA:3UTR      |
| chr6 | 46113367  | 46113529  | dmr | 2 | 0.360577 | ENPP4:3UTR      |
| chr6 | 55389037  | 55389038  | dmr | 1 | 0.357143 | HMGCLL1:intron  |
| chr6 | 56338749  | 56338850  | dmr | 1 | 0.212993 | DST:CDS:74      |
| chr6 | 57059368  | 57059517  | dmr | 3 | 0.358161 | RAB23:intron    |
| chr6 | 64394226  | 64394235  | dmr | 1 | 0.178864 | PHF3:CDS:3      |
| chr6 | 64420834  | 64420835  | dmr | 1 | 0.416667 | PHF3:intron     |
| chr6 | 66293169  | 66293371  | dmr | 3 | 0.309524 | EYS:intron      |
| chr6 | 70631698  | 70631778  | dmr | 1 | 0.225758 | COL19A1:intron  |
| chr6 | 71203050  | 71203229  | dmr | 3 | 0.313787 | FAM135A:intron  |
| chr6 | 71501033  | 71501192  | dmr | 4 | 0.300151 | SMAP1:intron    |
| chr6 | 76350225  | 76350226  | dmr | 1 | 0.346154 | SENP6:intron    |
| chr6 | 79784778  | 79784792  | dmr | 1 | 0.262424 | PHIP:intron     |
| chr6 | 80384909  | 80385038  | dmr | 3 | 0.293831 | SH3BGRL2:intron |
| chr6 | 80746707  | 80746708  | dmr | 1 | 0.268293 | TTK:intron      |

|      |           |           |     |   |          |                 |
|------|-----------|-----------|-----|---|----------|-----------------|
| chr6 | 80926335  | 80926537  | dmr | 2 | 0.260895 | BCKDHB:intron   |
| chr6 | 82458808  | 82458917  | dmr | 2 | 0.277062 | FAM46A:3UTR     |
| chr6 | 83610703  | 83610878  | dmr | 3 | 0.298607 | UBE3D:intron    |
| chr6 | 84896958  | 84897047  | dmr | 3 | 0.272894 | KIAA1009:intron |
| chr6 | 84922710  | 84922925  | dmr | 2 | 0.214581 | KIAA1009:CDS:5  |
| chr6 | 89386358  | 89386359  | dmr | 1 | 0.30848  | RNGTT:intron    |
| chr6 | 89423369  | 89423496  | dmr | 3 | 0.273812 | RNGTT:intron    |
| chr6 | 90047011  | 90047022  | dmr | 2 | 0.369231 | UBE2J1:intron   |
| chr6 | 90856586  | 90856754  | dmr | 2 | 0.303828 | BACH2:intron    |
| chr6 | 99848488  | 99848495  | dmr | 1 | 0.287913 | PNISR:CDS:10    |
| chr6 | 99909855  | 99910029  | dmr | 2 | 0.27673  | USP45:intron    |
| chr6 | 100987614 | 100987615 | dmr | 1 | 0.252252 | ASCC3:intron    |
| chr6 | 101060698 | 101060714 | dmr | 2 | 0.366667 | ASCC3:intron    |
| chr6 | 101152149 | 101152203 | dmr | 1 | 0.221538 | ASCC3:intron    |
| chr6 | 102177554 | 102177702 | dmr | 1 | 0.237374 | GRIK2:intron    |
| chr6 | 105182183 | 105182366 | dmr | 3 | 0.292255 | HACE1:intron    |
| chr6 | 106649644 | 106649729 | dmr | 3 | 0.350538 | ATG5:intron     |
| chr6 | 107743827 | 107743828 | dmr | 1 | 0.454545 | PDSS2:intron    |
| chr6 | 110464981 | 110465127 | dmr | 2 | 0.293153 | WASF1:intron    |
| chr6 | 110482244 | 110482350 | dmr | 1 | 0.275116 | WASF1:promoter  |
| chr6 | 111656065 | 111656114 | dmr | 2 | 0.283017 | REV3L:intron    |
| chr6 | 112402335 | 112402336 | dmr | 1 | 0.324324 | TUBE1:CDS:5     |
| chr6 | 125336606 | 125336688 | dmr | 1 | 0.331665 | RNF217:intron   |
| chr6 | 128454405 | 128454534 | dmr | 3 | 0.312112 | PTPRK:intron    |

|      |           |           |     |   |          |                          |
|------|-----------|-----------|-----|---|----------|--------------------------|
| chr6 | 128475715 | 128475716 | dmr | 1 | 0.227731 | PTPRK:intron             |
| chr6 | 128629288 | 128629595 | dmr | 2 | 0.431507 | PTPRK:intron             |
| chr6 | 129506928 | 129507153 | dmr | 3 | 0.304744 | LAMA2:intron             |
| chr6 | 129555901 | 129555971 | dmr | 3 | 0.328125 | LAMA2:intron             |
| chr6 | 131296226 | 131296227 | dmr | 1 | 0.295455 | EPB41L2:intron           |
| chr6 | 134322566 | 134322719 | dmr | 3 | 0.35081  | SLC2A12:intron           |
| chr6 | 135802780 | 135802970 | dmr | 2 | 0.258716 | AHI1:intron              |
| chr6 | 139459434 | 139459435 | dmr | 1 | 0.27561  | HECA:intron              |
| chr6 | 143954882 | 143954979 | dmr | 2 | 0.299663 | PHACTR2:intron           |
| chr6 | 146234629 | 146234630 | dmr | 1 | 0.27864  | SHPRH:CDS:23             |
| chr6 | 147119773 | 147119774 | dmr | 1 | 0.270833 | ADGB:intron              |
| chr6 | 147303703 | 147303879 | dmr | 2 | 0.326395 | LOC729178:intron         |
| chr6 | 149674683 | 149674832 | dmr | 3 | 0.261458 | TAB2:intron              |
| chr6 | 152707781 | 152707942 | dmr | 3 | 0.25281  | SYNE1:intron             |
| chr6 | 155098378 | 155098440 | dmr | 2 | 0.245283 | SCAF8:intron             |
| chr6 | 157156562 | 157156736 | dmr | 2 | 0.306366 | ARID1B:intron            |
| chr6 | 157501270 | 157501314 | dmr | 2 | 0.394737 | ARID1B:intron            |
| chr6 | 159025828 | 159025897 | dmr | 3 | 0.343817 | TMEM181:intron           |
| chr6 | 159596114 | 159596115 | dmr | 1 | 0.339161 | FNDC1:intron             |
| chr6 | 160157271 | 160157422 | dmr | 2 | 0.336985 | WTAP:promoter            |
| chr6 | 160157271 | 160157422 | dmr | 2 | 0.336985 | WTAP:promoter, WTAP:5UTR |
| chr6 | 161853966 | 161854026 | dmr | 2 | 0.277406 | PARK2:intron             |
| chr7 | 3944838   | 3944925   | dmr | 4 | 0.344444 | SDK1:intron              |
| chr7 | 7572439   | 7572462   | dmr | 3 | 0.367685 | COL28A1:promoter         |



|      |          |          |     |   |          |                                                                    |
|------|----------|----------|-----|---|----------|--------------------------------------------------------------------|
| chr7 | 11158936 | 11158937 | dmr | 1 | 0.27032  | PHF14:intron                                                       |
| chr7 | 15576442 | 15576473 | dmr | 1 | 0.298063 | AGMO:intron                                                        |
| chr7 | 18769533 | 18769709 | dmr | 2 | 0.386946 | HDAC9:intron                                                       |
| chr7 | 18936938 | 18937127 | dmr | 3 | 0.333353 | HDAC9:intron                                                       |
| chr7 | 24652147 | 24652271 | dmr | 3 | 0.399397 | MPP6:intron                                                        |
| chr7 | 24657054 | 24657055 | dmr | 1 | 0.294009 | MPP6:intron                                                        |
| chr7 | 24676496 | 24676521 | dmr | 1 | 0.265893 | MPP6:intron                                                        |
| chr7 | 32756995 | 32757042 | dmr | 3 | 0.396369 | DPY19L1P1:intron                                                   |
| chr7 | 34994074 | 34994140 | dmr | 2 | 0.326812 | DPY19L1:intron                                                     |
| chr7 | 36238126 | 36238214 | dmr | 3 | 0.337321 | EEPD1:intron                                                       |
| chr7 | 40543499 | 40543500 | dmr | 1 | 0.431034 | C7orf10:intron                                                     |
| chr7 | 45794411 | 45794594 | dmr | 3 | 0.374627 | SEPT7P2:intron                                                     |
| chr7 | 69541076 | 69541182 | dmr | 1 | 0.301341 | AUTS2:intron                                                       |
| chr7 | 73675539 | 73675540 | dmr | 1 | 0.316197 | PMS2L2:intron, GTF2IP1:intron, SPDYE8P:intron, LOC100093631:intron |
| chr7 | 77365945 | 77366067 | dmr | 3 | 0.31492  | RSBN1L:intron                                                      |
| chr7 | 78787714 | 78787715 | dmr | 1 | 0.317227 | MAGI2:intron                                                       |
| chr7 | 78846320 | 78846321 | dmr | 1 | 0.362552 | MAGI2:intron                                                       |
| chr7 | 81352243 | 81352402 | dmr | 4 | 0.397034 | HGF:intron                                                         |
| chr7 | 81603354 | 81603700 | dmr | 3 | 0.34268  | CACNA2D1:intron                                                    |
| chr7 | 81731068 | 81731079 | dmr | 2 | 0.2874   | CACNA2D1:intron                                                    |
| chr7 | 82042416 | 82042499 | dmr | 3 | 0.288495 | CACNA2D1:intron                                                    |
| chr7 | 82445079 | 82445273 | dmr | 3 | 0.312359 | PCLO:intron                                                        |
| chr7 | 82768404 | 82768405 | dmr | 1 | 0.44186  | PCLO:intron                                                        |
| chr7 | 84706674 | 84706839 | dmr | 3 | 0.386427 | SEMA3D:intron                                                      |

|      |           |           |     |   |          |                              |
|------|-----------|-----------|-----|---|----------|------------------------------|
| chr7 | 84727671  | 84727672  | dmr | 1 | 0.40119  | SEMA3D:intron                |
| chr7 | 91692437  | 91692485  | dmr | 3 | 0.315679 | AKAP9:intron                 |
| chr7 | 91715521  | 91715657  | dmr | 4 | 0.259717 | AKAP9:CDS:37                 |
| chr7 | 91782502  | 91782674  | dmr | 3 | 0.237226 | LRRD1:intron                 |
| chr7 | 91934317  | 91934318  | dmr | 1 | 0.407407 | ANKIB1:intron                |
| chr7 | 92029228  | 92029315  | dmr | 1 | 0.281355 | ANKIB1:3UTR                  |
| chr7 | 92414219  | 92414419  | dmr | 3 | 0.253999 | CDK6:intron                  |
| chr7 | 93626928  | 93627059  | dmr | 3 | 0.289386 | BET1:intron                  |
| chr7 | 94259661  | 94259720  | dmr | 3 | 0.338252 | SGCE:intron                  |
| chr7 | 102554355 | 102554456 | dmr | 1 | 0.36741  | LRRC17:intron, FBXL13:intron |
| chr7 | 107052974 | 107052975 | dmr | 1 | 0.347557 | COG5:CDS:7                   |
| chr7 | 107388794 | 107388940 | dmr | 3 | 0.328512 | CBLL1:intron                 |
| chr7 | 110972508 | 110972509 | dmr | 1 | 0.377735 | IMMP2L:intron                |
| chr7 | 111467491 | 111467492 | dmr | 1 | 0.291667 | DOCK4:intron                 |
| chr7 | 114309348 | 114309527 | dmr | 3 | 0.277517 | FOXP2:intron                 |
| chr7 | 114315464 | 114315465 | dmr | 1 | 0.308204 | FOXP2:intron                 |
| chr7 | 116764182 | 116764272 | dmr | 2 | 0.300647 | ST7-AS2:intron, ST7:intron   |
| chr7 | 120436018 | 120436078 | dmr | 2 | 0.484484 | TSPAN12:intron               |
| chr7 | 120973276 | 120973387 | dmr | 3 | 0.304077 | WNT16:intron                 |
| chr7 | 124386528 | 124386690 | dmr | 3 | 0.271118 | GPR37:CDS:2                  |
| chr7 | 124499996 | 124500118 | dmr | 2 | 0.285636 | POT1:intron                  |
| chr7 | 129840070 | 129840272 | dmr | 4 | 0.265788 | TMEM209:intron               |
| chr7 | 132996498 | 132996499 | dmr | 1 | 0.239049 | EXOC4:intron                 |
| chr7 | 133151729 | 133151869 | dmr | 2 | 0.297342 | EXOC4:intron                 |

|      |           |           |     |   |          |                                 |
|------|-----------|-----------|-----|---|----------|---------------------------------|
| chr7 | 135333145 | 135333310 | dmr | 4 | 0.306527 | NUP205:CDS:43                   |
| chr7 | 137240365 | 137240556 | dmr | 3 | 0.304753 | DGKI:intron                     |
| chr7 | 143000379 | 143000417 | dmr | 2 | 0.277926 | CASP2:intron                    |
| chr7 | 144525481 | 144525661 | dmr | 3 | 0.345705 | TPK1:intron                     |
| chr7 | 147130224 | 147130380 | dmr | 3 | 0.27105  | CNTNAP2:intron, MIR548I4:intron |
| chr7 | 148441664 | 148441716 | dmr | 3 | 0.405538 | CUL1:intron                     |
| chr7 | 148454137 | 148454209 | dmr | 1 | 0.148494 | CUL1:CDS:3                      |
| chr7 | 149179189 | 149179221 | dmr | 1 | 0.259804 | ZNF746:intron                   |
| chr7 | 151868824 | 151869015 | dmr | 3 | 0.262655 | MLL3:intron                     |
| chr8 | 4082838   | 4082918   | dmr | 2 | 0.359585 | CSMD1:intron                    |
| chr8 | 6311110   | 6311346   | dmr | 3 | 0.278579 | MCPH1:intron                    |
| chr8 | 6419856   | 6419857   | dmr | 1 | 0.454545 | ANGPT2:intron, MCPH1:intron     |
| chr8 | 13055874  | 13055875  | dmr | 1 | 0.290323 | DLC1:intron                     |
| chr8 | 13325516  | 13325553  | dmr | 2 | 0.280247 | DLC1:intron                     |
| chr8 | 15440687  | 15440898  | dmr | 3 | 0.302588 | TUSC3:intron                    |
| chr8 | 15480636  | 15480739  | dmr | 5 | 0.311448 | TUSC3:CDS:2                     |
| chr8 | 17797828  | 17797829  | dmr | 1 | 0.316176 | PCM1:intron                     |
| chr8 | 17803368  | 17803526  | dmr | 2 | 0.275715 | PCM1:intron                     |
| chr8 | 28750416  | 28750556  | dmr | 2 | 0.279735 | HMBOX1:intron                   |
| chr8 | 28866973  | 28867033  | dmr | 3 | 0.33779  | HMBOX1:intron                   |
| chr8 | 30275458  | 30275488  | dmr | 1 | 0.269859 | RBPMS:intron                    |
| chr8 | 30888578  | 30888579  | dmr | 1 | 0.3125   | PURG:ncexon:1                   |
| chr8 | 30973215  | 30973282  | dmr | 3 | 0.337366 | WRN:intron                      |
| chr8 | 31022586  | 31022587  | dmr | 1 | 0.289696 | WRN:intron                      |

|      |          |          |     |   |          |                     |
|------|----------|----------|-----|---|----------|---------------------|
| chr8 | 39080572 | 39080612 | dmr | 1 | 0.236559 | ADAM32:CDS:14       |
| chr8 | 39180255 | 39180256 | dmr | 1 | 0.444444 | ADAM5P:intron       |
| chr8 | 42915082 | 42915271 | dmr | 1 | 0.338993 | FNTA:intron         |
| chr8 | 48341206 | 48341355 | dmr | 3 | 0.420465 | KIAA0146:intron     |
| chr8 | 48776000 | 48776001 | dmr | 1 | 0.384848 | PRKDC:CDS:42        |
| chr8 | 50961706 | 50961793 | dmr | 3 | 0.363475 | SNTG1:intron        |
| chr8 | 51068834 | 51068926 | dmr | 2 | 0.322967 | SNTG1:intron        |
| chr8 | 51227620 | 51227621 | dmr | 1 | 0.206897 | SNTG1:intron        |
| chr8 | 51535303 | 51535483 | dmr | 2 | 0.338725 | SNTG1:intron        |
| chr8 | 53048360 | 53048582 | dmr | 3 | 0.282803 | ST18:intron         |
| chr8 | 53577689 | 53577876 | dmr | 3 | 0.307635 | RB1CC1:intron       |
| chr8 | 58196080 | 58196170 | dmr | 3 | 0.351222 | C8orf71:intron      |
| chr8 | 62351409 | 62351410 | dmr | 1 | 0.381944 | CLVS1:intron        |
| chr8 | 62495511 | 62495628 | dmr | 2 | 0.238511 | ASPH:intron         |
| chr8 | 62586676 | 62586743 | dmr | 3 | 0.260832 | ASPH:intron         |
| chr8 | 64085558 | 64085663 | dmr | 1 | 0.273413 | YTHDF3:intron       |
| chr8 | 66525389 | 66525479 | dmr | 1 | 0.188378 | ARMC1:CDS:3         |
| chr8 | 66638419 | 66638510 | dmr | 2 | 0.372619 | PDE7A:intron        |
| chr8 | 72272445 | 72272446 | dmr | 1 | 0.387446 | EYA1:intron         |
| chr8 | 74461507 | 74461648 | dmr | 3 | 0.301513 | STAU2:intron        |
| chr8 | 77574696 | 77574768 | dmr | 1 | 0.31348  | LOC100192378:intron |
| chr8 | 77583101 | 77583501 | dmr | 5 | 0.295665 | LOC100192378:intron |
| chr8 | 77701967 | 77702223 | dmr | 3 | 0.299047 | ZFHX4:intron        |
| chr8 | 87486359 | 87486446 | dmr | 2 | 0.32368  | FAM82B:3UTR         |

|      |           |           |     |   |          |                 |
|------|-----------|-----------|-----|---|----------|-----------------|
| chr8 | 90990717  | 90990718  | dmr | 1 | 0.28125  | NBN:intron      |
| chr8 | 95524192  | 95524347  | dmr | 2 | 0.376829 | KIAA1429:CDS:12 |
| chr8 | 99475996  | 99476046  | dmr | 2 | 0.319809 | STK3:intron     |
| chr8 | 99528896  | 99529063  | dmr | 3 | 0.257188 | STK3:intron     |
| chr8 | 99634808  | 99634941  | dmr | 3 | 0.282544 | STK3:intron     |
| chr8 | 99744391  | 99744392  | dmr | 1 | 0.311275 | STK3:intron     |
| chr8 | 100190812 | 100190813 | dmr | 1 | 0.28125  | VPS13B:intron   |
| chr8 | 101589288 | 101589289 | dmr | 1 | 0.386667 | SNX31:CDS:13    |
| chr8 | 106683539 | 106683665 | dmr | 2 | 0.433284 | ZFPM2:intron    |
| chr8 | 107734704 | 107734705 | dmr | 1 | 0.522727 | OXR1:intron     |
| chr8 | 107771758 | 107771863 | dmr | 3 | 0.316249 | ABRA:3UTR       |
| chr8 | 110302134 | 110302135 | dmr | 1 | 0.342857 | NUDCD1:CDS:5    |
| chr8 | 121320127 | 121320259 | dmr | 3 | 0.314123 | COL14A1:intron  |
| chr8 | 121430752 | 121430896 | dmr | 3 | 0.36008  | MRPL13:intron   |
| chr8 | 121794883 | 121794981 | dmr | 2 | 0.283943 | SNTB1:intron    |
| chr8 | 124137488 | 124137631 | dmr | 4 | 0.304596 | WDR67:intron    |
| chr8 | 126055899 | 126056088 | dmr | 2 | 0.266426 | KIAA0196:CDS:22 |
| chr8 | 131131146 | 131131147 | dmr | 1 | 0.381944 | ASAP1:intron    |
| chr8 | 141725063 | 141725064 | dmr | 1 | 0.397368 | PTK2:intron     |
| chr8 | 144810244 | 144810353 | dmr | 2 | 0.662338 | FAM83H:CDS:4    |
| chr9 | 2056203   | 2056232   | dmr | 2 | 0.256805 | SMARCA2:intron  |
| chr9 | 4237231   | 4237293   | dmr | 2 | 0.339269 | GLIS3:intron    |
| chr9 | 5675547   | 5675594   | dmr | 2 | 0.31565  | KIAA1432:intron |
| chr9 | 6481970   | 6482014   | dmr | 3 | 0.278516 | UHRF2:CDS:8     |

|      |           |           |     |   |          |                                    |
|------|-----------|-----------|-----|---|----------|------------------------------------|
| chr9 | 14100920  | 14100921  | dmr | 1 | 0.373377 | NFIB:intron                        |
| chr9 | 14119424  | 14119582  | dmr | 3 | 0.324324 | NFIB:intron                        |
| chr9 | 14648720  | 14648721  | dmr | 1 | 0.35     | ZDHHC21:intron                     |
| chr9 | 16638708  | 16638823  | dmr | 2 | 0.31628  | BNC2:intron                        |
| chr9 | 17221318  | 17221466  | dmr | 3 | 0.351987 | CNTLN:intron                       |
| chr9 | 17275066  | 17275169  | dmr | 2 | 0.358641 | CNTLN:intron                       |
| chr9 | 17296539  | 17296579  | dmr | 1 | 0.334783 | CNTLN:intron                       |
| chr9 | 18641686  | 18641687  | dmr | 1 | 0.304615 | ADAMTSL1:intron                    |
| chr9 | 36360280  | 36360281  | dmr | 1 | 0.323718 | RNF38:intron                       |
| chr9 | 37231444  | 37231445  | dmr | 1 | 0.425    | ZCCHC7:intron                      |
| chr9 | 66606218  | 66606246  | dmr | 1 | 0.229148 | LOC286297:intron, ANKRD20A3:intron |
| chr9 | 72878871  | 72878877  | dmr | 2 | 0.39     | SMC5:intron                        |
| chr9 | 79911788  | 79912153  | dmr | 2 | 0.325239 | VPS13A:intron                      |
| chr9 | 79964286  | 79964451  | dmr | 2 | 0.315942 | VPS13A:intron                      |
| chr9 | 80394672  | 80394677  | dmr | 1 | 0.266294 | GNAQ:intron                        |
| chr9 | 80865843  | 80866118  | dmr | 2 | 0.309154 | CEP78:intron                       |
| chr9 | 95144528  | 95144697  | dmr | 3 | 0.378015 | CENPP:intron                       |
| chr9 | 101177404 | 101177597 | dmr | 4 | 0.289565 | GABBR2:intron                      |
| chr9 | 106864345 | 106864656 | dmr | 3 | 0.307261 | SMC2:CDS:7                         |
| chr9 | 107519827 | 107520130 | dmr | 2 | 0.283333 | NIPSNAP3A:intron                   |
| chr9 | 107544506 | 107544507 | dmr | 1 | 0.297555 | ABCA1:3UTR                         |
| chr9 | 108074722 | 108074723 | dmr | 1 | 0.294958 | SLC44A1:intron                     |
| chr9 | 108138192 | 108138193 | dmr | 1 | 0.375    | SLC44A1:intron                     |
| chr9 | 111792623 | 111792624 | dmr | 1 | 0.290323 | C9orf5:intron                      |

|      |           |           |     |    |          |                                                                                                                                                                      |
|------|-----------|-----------|-----|----|----------|----------------------------------------------------------------------------------------------------------------------------------------------------------------------|
| chr9 | 112206918 | 112206919 | dmr | 1  | 0.305668 | PTPN3:intron                                                                                                                                                         |
| chr9 | 113678080 | 113678134 | dmr | 3  | 0.425018 | LPAR1:intron                                                                                                                                                         |
| chr9 | 115963948 | 115963949 | dmr | 1  | 0.285714 | FKBP15:intron                                                                                                                                                        |
| chr9 | 115963985 | 115964041 | dmr | 2  | 0.286927 | FKBP15:intron                                                                                                                                                        |
| chr9 | 117220316 | 117220345 | dmr | 2  | 0.309091 | DFNB31:intron                                                                                                                                                        |
| chr9 | 125802979 | 125802980 | dmr | 1  | 0.213489 | RABGAP1:intron                                                                                                                                                       |
| chr9 | 126577972 | 126578100 | dmr | 3  | 0.257622 | DENND1A:intron                                                                                                                                                       |
| chr9 | 127694128 | 127694129 | dmr | 1  | 0.231419 | GOLGA1:intron                                                                                                                                                        |
| chr9 | 128333180 | 128333252 | dmr | 2  | 0.366752 | MAPKAP1:intron                                                                                                                                                       |
| chr9 | 128363540 | 128363656 | dmr | 2  | 0.217544 | MAPKAP1:intron                                                                                                                                                       |
| chr9 | 128530678 | 128530762 | dmr | 3  | 0.295749 | PBX3:intron                                                                                                                                                          |
| chr9 | 128636444 | 128636445 | dmr | 1  | 0.351744 | PBX3:intron                                                                                                                                                          |
| chr9 | 129592171 | 129592246 | dmr | 2  | 0.428951 | ZBTB43:intron                                                                                                                                                        |
| chrX | 9880813   | 9880948   | dmr | 6  | 0.652047 | SHROOM2:intron                                                                                                                                                       |
| chrX | 33152956  | 33152957  | dmr | 1  | 0.583333 | DMD:intron                                                                                                                                                           |
| chrX | 114879217 | 114879367 | dmr | 3  | 0.364498 | PLS3:CDS:10                                                                                                                                                          |
| chrX | 132952123 | 132952166 | dmr | 3  | 0.195122 | GPC3:intron                                                                                                                                                          |
| chrY | 6404063   | 6404611   | dmr | 10 | 0.360326 | TTY1B:intron, TTY2B:intron, TTY1:intron, TTY8:intron, TTY23:intron, TTY7B:intron, TTY8B:intron, TTY7:intron, TTY21:intron, TTY23B:intron, TTY2:intron, TTY21B:intron |
| chrY | 6405369   | 6405754   | dmr | 4  | 0.287802 | TTY1B:intron, TTY2B:intron, TTY1:intron, TTY8:intron, TTY23:intron, TTY7B:intron, TTY8B:intron, TTY7:intron, TTY21:intron, TTY23B:intron, TTY2:intron, TTY21B:intron |
| chrY | 16865593  | 16865786  | dmr | 3  | +        | NLGN4Y:intron                                                                                                                                                        |

---

Supplementary Table 8: The genes with DMRs which located in the gene promoter by Radmeth methods analysis

---

**gene symbol**

---

COL28A1

FBXL21

FOXJ3

FPGT

FPGT-TNNI3K

HNRNPA1L2

IDH1

LRRC70

PDLIM5

RGS13

SLC38A1

SNRPN

SNURF

SREK1

SYT1

USP53

WASF1

WTAP

ZNF268

ZNF280D

---
